# Supplementary material for: Effect of social prescribing link workers on health outcomes and costs for adults in primary care and community settings: a systematic review
Source: PubMed Central journal article supplement — BMJ Open. 2022 Sep 14;12(10):e062951. doi: 10.1136/bmjopen-2022-062951 (PMC9644316; doi:10.1136/bmjopen-2022-062951), 2022-09-14
Supplement: bmjopen-2022-062951.draft_revisions.pdf [file bmjopen-2022-062951.draft_revisions.pdf]

# BMJ Open

BMJ Open is committed to open peer review. As part of this commitment we make the peer review history of every article we publish publicly available.

When an article is published we post the peer reviewers' comments and the authors' responses online. We also post the versions of the paper that were used during peer review. These are the versions that the peer review comments apply to.

The versions of the paper that follow are the versions that were submitted during the peer review process. They are not the versions of record or the final published versions. They should not be cited or distributed as the published version of this manuscript.

BMJ Open is an open access journal and the full, final, typeset and author-corrected version of record of the manuscript is available on our site with no access controls, subscription charges or pay-per-view fees (<http://bmjopen.bmj.com>).

If you have any questions on BMJ Open's open peer review process please email [info.bmjopen@bmj.com](mailto:info.bmjopen@bmj.com)

# BMJ Open

## A SYSTEMATIC REVIEW OF THE EFFECTIVENESS OF LINK WORKERS PROVIDING SOCIAL PRESCRIBING ON HEALTH OUTCOMES AND COSTS FOR ADULTS IN PRIMARY CARE AND COMMUNITY SETTINGS.

|                               |                                                                                                                                                                                                                                                                                                                                                                                                                                                                                                                                                                                                                                                                                                                                     |
|-------------------------------|-------------------------------------------------------------------------------------------------------------------------------------------------------------------------------------------------------------------------------------------------------------------------------------------------------------------------------------------------------------------------------------------------------------------------------------------------------------------------------------------------------------------------------------------------------------------------------------------------------------------------------------------------------------------------------------------------------------------------------------|
| Journal:                      | <i>BMJ Open</i>                                                                                                                                                                                                                                                                                                                                                                                                                                                                                                                                                                                                                                                                                                                     |
| Manuscript ID                 | bmjopen-2022-062951                                                                                                                                                                                                                                                                                                                                                                                                                                                                                                                                                                                                                                                                                                                 |
| Article Type:                 | Original research                                                                                                                                                                                                                                                                                                                                                                                                                                                                                                                                                                                                                                                                                                                   |
| Date Submitted by the Author: | 24-Mar-2022                                                                                                                                                                                                                                                                                                                                                                                                                                                                                                                                                                                                                                                                                                                         |
| Complete List of Authors:     | Kiely, Bridget; Royal College of Surgeons in Ireland, Department of General Practice<br>Croke, Aisling; Royal College of Surgeons in Ireland, Department of General Practice<br>O'Shea, Muireann; Royal College of Surgeons in Ireland, Department of General Practice<br>Boland, Fiona; Royal College of Surgeons in Ireland, HRB Centre For Primary Care Research, Division of Population Health Sciences (PHS)<br>O'Shea, Eamon; National University of Ireland Galway, School of Business and Economics<br>Connolly, Deirdre; Trinity College, Occupational Therapy<br>Smith, Susan; Trinity College Dublin, Discipline of Public Health and Primary Care; Royal College of Surgeons in Ireland, Department of General Practice |
| Keywords:                     | SOCIAL MEDICINE, PRIMARY CARE, Health policy < HEALTH SERVICES ADMINISTRATION & MANAGEMENT                                                                                                                                                                                                                                                                                                                                                                                                                                                                                                                                                                                                                                          |
|                               |                                                                                                                                                                                                                                                                                                                                                                                                                                                                                                                                                                                                                                                                                                                                     |

SCHOLARONE™  
Manuscripts

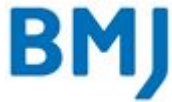

I, the Submitting Author has the right to grant and does grant on behalf of all authors of the Work (as defined in the below author licence), an exclusive licence and/or a non-exclusive licence for contributions from authors who are: i) UK Crown employees; ii) where BMJ has agreed a CC-BY licence shall apply, and/or iii) in accordance with the terms applicable for US Federal Government officers or employees acting as part of their official duties; on a worldwide, perpetual, irrevocable, royalty-free basis to BMJ Publishing Group Ltd ("BMJ") its licensees and where the relevant Journal is co-owned by BMJ to the co-owners of the Journal, to publish the Work in this journal and any other BMJ products and to exploit all rights, as set out in our [licence](#).

The Submitting Author accepts and understands that any supply made under these terms is made by BMJ to the Submitting Author unless you are acting as an employee on behalf of your employer or a postgraduate student of an affiliated institution which is paying any applicable article publishing charge ("APC") for Open Access articles. Where the Submitting Author wishes to make the Work available on an Open Access basis (and intends to pay the relevant APC), the terms of reuse of such Open Access shall be governed by a Creative Commons licence – details of these licences and which [Creative Commons](#) licence will apply to this Work are set out in our licence referred to above.

Other than as permitted in any relevant BMJ Author's Self Archiving Policies, I confirm this Work has not been accepted for publication elsewhere, is not being considered for publication elsewhere and does not duplicate material already published. I confirm all authors consent to publication of this Work and authorise the granting of this licence.

1  
2  
3 **TITLE: A SYSTEMATIC REVIEW OF THE EFFECTIVENESS OF LINK**  
4  
5 **WORKERS PROVIDING SOCIAL PRESCRIBING ON HEALTH OUTCOMES AND**  
6  
7 **COSTS FOR ADULTS IN PRIMARY CARE AND COMMUNITY SETTINGS.**  
8  
9

10  
11 **AUTHORS**  
12  
13

14 Bridget Kiely<sup>1</sup> URI: <https://orcid.org/0000-0002-5752-0432>

15  
16  
17 Aisling Croke<sup>1</sup> URI: <https://orcid.org/0000-0002-2674-7474>

18  
19  
20 Muireann O'Shea<sup>1</sup>

21  
22  
23 Fiona Boland<sup>2</sup> URI: <https://orcid.org/0000-0003-3228-0046>

24  
25  
26 Eamon O'Shea<sup>3</sup> URI: <https://orcid.org/0000-0002-5521-5987>

27  
28  
29 Deirdre Connolly<sup>4</sup> URI: <https://orcid.org/0000-0001-8539-8123>

30  
31  
32 Susan M. Smith<sup>5</sup> URI: <https://orcid.org/0000-0001-6027-2727>

33  
34  
35  
36  
37  
38 <sup>1</sup> Department of General Practice, RCSI University of Medicine and Health, Dublin, Ireland

39  
40  
41 <sup>2</sup> Data Science Centre, RCSI University of Medicine and Health Sciences, Dublin, Ireland

42  
43  
44 <sup>3</sup> Centre for Economic and Social Research on Dementia, National University of Ireland,  
45  
46 Galway, Galway, Ireland

47  
48  
49 <sup>4</sup> Discipline of Occupational Therapy, Trinity College, Dublin, Ireland

50  
51  
52 <sup>5</sup> Discipline of Public Health and Primary Care, Trinity College, Dublin, Ireland

1  
2  
3 Correspondence to: Dr Bridget Kiely, Department of General Practice, RCSI University of  
4  
5 Medicine and Health, 122 St Stephens Green, Dublin 2, Ireland  
6  
7

8  
9 [bridgetkiely@rcsi.com](mailto:bridgetkiely@rcsi.com)  
10  
11  
12  
13

14 Word count: 5,543  
15  
16  
17  
18  
19  
20  
21  
22  
23  
24  
25  
26  
27  
28  
29  
30  
31  
32  
33  
34  
35  
36  
37  
38  
39  
40  
41  
42  
43  
44  
45  
46  
47  
48  
49  
50  
51  
52  
53  
54  
55  
56  
57  
58  
59  
60

For peer review only

## ABSTRACT

**Objectives:** To establish the evidence base for the effectiveness and costs of link workers in improving health outcomes for people in primary care and community settings with a particular focus on individuals living in deprived areas and with multimorbidity.

**Methods:** A systematic review of the literature for randomised and non-randomised trials examining use of link workers, or equivalent, based in primary care or community settings for community dwelling adults compared to usual care. Primary outcomes were health related quality of life (HRQoL) and mental health. Secondary outcomes included patient reported outcomes measures, physical activity, clinical outcomes, healthcare utilisation and costs. Two authors independently screened abstracts, selected studies, extracted data, evaluated study quality and judged certainty of the evidence. Results were synthesised narratively.

**Results:** Seven studies including 3,341 participants were included. Two studies specifically targeted people with multimorbidity and three targeted people living in areas of deprivation. Four studies reported no impact on HRQoL. Four studies reported mental health outcomes with three reporting no impact. There was no evidence of impact on most secondary outcomes apart from improvement in self-rated health in two studies and two studies in a specific setting found improved ratings of high quality care and reduced hospitalisations. Two studies reported costs, but there were no cost effectiveness analyses. The certainty of the evidence was low or very low.

**Conclusion:** There is very limited evidence for social prescribing link workers generally and for people with multimorbidity in areas of deprivation. Policy makers should note the limited evidence base and support robust evaluation of current programmes before mainstreaming social prescribing link workers.

1  
2  
3 **Prospero registration:** CRD42019134737 (04/07/2019)  
4  
5

6 **STRENGTHS AND LIMITATIONS**  
7  
8

- 9
- 10 • We conducted a worldwide search for link worker social prescribing interventions,  
11 rather than focusing on a specific geographic location and included equivalent roles  
12 across all healthcare systems.  
13  
14
  - 15 • We only included randomized trials and controlled before after studies that met the  
16 Cochrane Effectiveness of Practice and Organisation of Care guidance, to avoid  
17 potentially biased results from poorer quality studies.  
18  
19
  - 20 • This is the first systematic review that specifically examined the evidence for social  
21 prescribing link workers for people with multimorbidity and in areas of deprivation.  
22  
23
  - 24 • The limited number of studies and heterogeneity in study design and intervention  
25 meant a meta-analysis was not possible. We conducted a robust narrative synthesis  
26 including an assessment of the certainty of the evidence.  
27  
28  
29  
30  
31  
32  
33  
34  
35  
36  
37  
38  
39  
40  
41  
42  
43  
44  
45  
46  
47  
48  
49  
50  
51  
52  
53  
54  
55  
56  
57  
58  
59  
60

## INTRODUCTION

Social prescribing is a way of linking people with complex needs to non-medical supports in the community. There are different models of social prescribing, ranging from online signposting services to individual support from a link worker to access community resource.

The link worker model of social prescribing is most frequently used in the UK.(1) Link workers determine the health and well-being needs of people referred to them (usually by health care professionals), co-produce a health and well-being plan and provide support to connect with community resources to meet these needs. No qualifications are specified for link workers, rather there is a focus on relevant experience and skills, such as listening and empathising, to perform the role.(2) Many health systems are developing social prescribing initiatives and NHS England is funding link workers in primary care and recommends their use for people who have one or more chronic conditions, need support with their mental health, are isolated or who have complex social problems.(3)

People experiencing multimorbidity (defined as two or more chronic health conditions) need support with managing their conditions. They experience fragmented care, poorer health outcomes and more psychological stress and as multimorbidity becomes the norm among an aging population, it poses a significant challenge to health systems.(4) People with complex multimorbidity account for a higher proportion of hospital admissions and therefore costs, and have higher consultation rates than those without.(5) In socially deprived areas, the impact is greater as people experience earlier onset of multimorbidity and are more likely to have mental health comorbidities.(6) A 2021 systematic review of interventions targeting people with multimorbidity in primary care identified 16 RCTs but found limited evidence for interventions that improve outcomes including HRQoL and mental health outcomes.(7)



1  
2  
3 The review did not identify any eligible social prescribing linkworker interventions but  
4  
5 concluded that existing evidence suggests that future research should target a range of areas  
6  
7 including patient health behaviours that can be addressed through social prescribing.  
8  
9

10  
11 Link workers providing social prescribing may have an impact on health outcomes for people  
12  
13 experiencing multimorbidity, particularly in areas of social deprivation, but despite their  
14  
15 widespread roll out in the U.K., there is limited evidence for their effectiveness.(8) If  
16  
17 effective, social prescribing should reduce health care costs, by addressing the social  
18  
19 problems that reportedly drive 20% of primary care attendances and the social determinants  
20  
21 of health that lead to poorer outcomes.(9) A recent systematic review however, concluded  
22  
23 that there was a lack of evidence for how, for whom and when social prescribing was  
24  
25 effective or how much it cost.(10) Previous reviews have only looked at U.K. based  
26  
27 interventions and included a broad range of studies including those with uncontrolled  
28  
29 designs.(11, 12) We aimed to systematically review the evidence of effectiveness and costs  
30  
31 of link worker social prescribing interventions internationally and to establish the evidence, if  
32  
33 any, for their effectiveness in people with multimorbidity and social deprivation.  
34  
35  
36  
37  
38  
39

## 40 **METHODS**

41  
42  
43 We conducted a systematic review of studies reporting effectiveness and/or costs of  
44  
45 linkworkers based in primary or community care settings for community dwelling adults. We  
46  
47 included randomized trials and non randomized trials that met the Cochrane Effectiveness of  
48  
49 Practice and Organisation of Care (EPOC) guidance on eligible study designs.(13) We  
50  
51 followed the PRISMA statement for reporting systematic reviews, (14) (Appendix 1) and  
52  
53 registered our review on Prospero CRD42019134737 (04/07/2019).  
54  
55  
56  
57  
58  
59  
60

## Eligibility criteria

### Participants/population

We included studies on community dwelling adults attending primary care. Participants did not need to have any specific index condition. We included all studies whether they focused on participants in areas of social deprivation or not, but we specifically extracted data on social deprivation and multimorbidity where it was reported. We excluded studies on children and those in residential or supported care.

### Intervention

Link workers may be known by other terms such as community health workers, patient navigators or health facilitators. While all of these work in the area of health, they are generally considered “lay workers” as they have not completed formal professional health or social care qualifications. Similarly the process of social prescribing may be known by other terms such as “community referral” or “navigation”. Inclusion was based on the function of the role, i.e. supporting people to improve their health and wellbeing through connecting them with community resources and health and social care coordination, recognising that there is a wide range of terms used to describe such roles.

We included interventions that involved

- A referral (including self-referrals) to a link worker (a non-health or social care professional) who was based either in a primary care practice or a community or voluntary organisation
- Participants meeting with a link worker face to face at least once

- Determining an individual range of health and social care supports and community resources that the person would be willing to engage with and being offered support and follow up to engage with their chosen supports and activities

We excluded interventions without a link worker that only involved signposting to services, used volunteers as link workers or were delivered by telephone. Interventions where additional support was being provided by health care professionals or personal care provided alongside health and social care coordination such as disability support workers were excluded as it was not possible to separate the effects of the different components of care. We excluded multi-faceted interventions, which mainly comprised of education and goal setting around disease control or health behavior change interventions, even if they had an element of social prescribing as it was not possible to separate the impact of the different components of the intervention.

#### Comparator(s)

We only included studies with a comparator group that did not involve any social prescribing and met the EPOC guidance on controlled before after (CBA) studies, i.e. contemporaneous data collection, controls drawn from similar sites and at least 2 intervention and 2 control sites.(13)

#### Setting

Primary care was generally defined as “care provided by clinicians that are available to treat all common conditions in all age groups and have an ongoing relationship with their patients”.(15) This definition allowed for a more flexible interpretation in countries that have different models of healthcare. We excluded studies that focused on hospital inpatients or specialist services or were emergency department based. The definition of social deprivation

1  
2  
3 is debated. It varies from country to country and is usually based on relative socioeconomic  
4 capacity.(16) For this review, we did not have a definition of deprivation, rather we described  
5  
6 how deprivation was defined in relevant studies.  
7  
8  
9

## 10 Outcomes

### 11 *Main outcome*

12  
13  
14 We included all reported outcomes, but based on our interest in assessing link workers to  
15 support patient with multimorbidity, we focused on outcomes in the core outcome set for  
16 multimorbidity that recommends primary outcomes of quality of life, mental health and  
17 mortality for interventions focused on multimorbidity.(17)  
18  
19  
20  
21  
22  
23  
24  
25  
26  
27

28 The primary outcomes for the review were:

- 29 • Health related quality of life (HRQoL), as measured by a validated instrument.
- 30 • Mental health outcomes, as measured by a validated instrument for screening for  
31 mental health conditions.  
32  
33  
34  
35  
36  
37  
38  
39

### 40 *Additional outcomes*

41  
42  
43 Secondary outcomes included also focused on the core outcome set for multimorbidity.(17)  
44  
45 While this is a wide range of outcomes it is in keeping with the MRC frameworks' guide on  
46 using multiple outcome measures for complex interventions.(18) These included:  
47  
48  
49

- 50 • Patient-reported outcomes on social-connectedness or isolation, self-rated health,  
51 patient experience of care, treatment burden, self-management behaviour and self-  
52 efficacy.  
53  
54  
55  
56  
57  
58  
59  
60

- Physical activity and function included measures of physical activity (self-reported or objectively measured), physical function, activities of daily living.
- Health service utilisation defined as number of GP visits, ED attendances or hospital admissions as measured via primary care or hospital records or self-reported.
- Any physical health data reported was included.
- Any cost data or social return on investment data.

### Search strategy

We searched 11 bibliographic and trials databases for randomised controlled trials and non-randomised controlled trials that meet the criteria outlined in the Cochrane Effective Practice and Organisation of Care (EPOC) guidance on study design(13) from inception up to July 2021 with no language limits: [Cochrane database](#), [Cochrane Central register of Controlled trials](#), [ClinicalTrials.gov](#) and [EU Clinical Trials Register](#), [Cumulative Index of Nursing and Allied Health Literature](#) (CINAHL), [Embase](#), Global Health, [PubMed/MEDLINE](#), [Psychinfo](#), [LILACS](#) (Latin American and Caribbean Health Sciences Information database) and Web of Science. To identify economic evaluations that may be of relevance we also searched the NHS EED (NHS Economic Evaluation Database), Health Technology Assessment Database (both available via the [Centre for Reviews and Dissemination \(CRD\)](#), University of York) and [CEA](#) (Cost-Effectiveness Analysis Registry) up to July 2019. We conducted a grey literature search of the following databases: [Irish Health Service Executive \(HSE\) Lenus](#), [RIAN](#), [Open Grey](#), [DART EUROPE](#), [Google](#) and [Google Scholar](#) and [WHOLIS](#) (World Health Organization Library Information System) up to July 2021. We also conducted a forward and backward citation search of included studies. Relevant websites (The Kings Fund, NHS Social Prescribing, National Institute for Clinical Excellence, Social Prescribing Network, Health Foundation, Nuffield Trust, HSE Social Prescribing, and Oxford

1  
2  
3 Social Prescribing Research Network) were searched for evaluations. The first 23 pages of a  
4  
5 Google Search for “social prescribing” and the first 21 pages of a Google scholar search were  
6  
7 reviewed for additional literature. Please see Extended data, Appendix 2 for sample search  
8  
9 strategy.  
10  
11  
12

### 13 **Data management**

14  
15  
16  
17 [Rayyan](#) was used to sort abstracts for inclusion and exclusion. References were managed with  
18  
19 [Endnote](#) 8 reference manager.  
20  
21  
22

### 23 **Review Process**

24  
25  
26 The lead author (BK) did an initial screen to remove clearly ineligible titles. BK and AC  
27  
28 independently reviewed the abstracts of all potentially eligible titles, discarded those that  
29  
30 clearly did not meet inclusion criteria and independently reviewed the full texts of the  
31  
32 remainder to assess eligibility for final inclusion. Any discrepancies were resolved through  
33  
34 discussion with a third reviewer (SMS). Data extraction was completed by the lead author  
35  
36 and checked by another author (MOS). Two authors (BK and AC) independently assessed  
37  
38 and cross-checked the risk of bias in all included studies using the Cochrane EPOC Guidance  
39  
40 for assessing risk of bias.(19) The certainty of the evidence for outcomes was independently  
41  
42 assessed by two authors (BK and MOS) using the Grading of Recommendations Assessment,  
43  
44 Development and Evaluation (GRADE) criteria including risk of bias, consistency of effect,  
45  
46 imprecision, indirectness and other potential criteria such as publication bias.(20) Any  
47  
48 discrepancies were discussed with the senior author (SMS) until consensus was reached.  
49  
50 RCTs and CBAs were assessed separately. Overall certainty was based on assessment of  
51  
52 evidence from RCTs where more than one was available.  
53  
54  
55  
56  
57  
58  
59  
60

### Strategy for data synthesis

Due to the heterogeneity in terms of study design, risk of bias, participants, interventions and outcomes, a narrative synthesis was performed and presented in tabular form to include the following headings: study design, setting, participants, nature of intervention, outcome measures used, effects and costs. We explored the possibility of completing meta-analysis, however, in the two studies that were similar in terms of study design, intervention characteristics and duration of follow up, there was insufficient data reported on the primary outcomes. As there were only two studies, authors were not contacted for additional data. We had planned to complete sub-group analyses based on multimorbidity, living in areas of social deprivation and link worker location, but this was not possible due to substantial methodological heterogeneity, including study design and definitions and reporting of multimorbidity and deprivation.

### Public Patient Involvement

This review is part of one of four PhD projects under a Health Research Board collaborative doctoral award (CDA) in multimorbidity. The original CDA project application and PhD topics had input from a PPI advisory group. A multimorbidity PPI advisory group was set up specifically to support the four PhD projects in the CDA. The lead reviewer (BK) presented the results of this review to the group who provided input on implications for policy, practice and research, included in the discussion. See Appendix 3 Guidance on Reporting Involvement of Public and Patients (GRIPP) 2 form in extended data for further details on PPI methods.

## RESULTS

The database search identified 20,656 records after duplicate removal. 19,726 were removed after title screening leaving 930 abstracts for review. 315 full texts were assessed for eligibility including 221 identified from the database search and 94 from other sources. (See Figure 1: PRISMA Flow diagram)

### Included studies and participants

Eight papers reporting seven studies, including 3,341 participants were identified. Four were randomized trials (RCTs),(21-24) three controlled before after studies (CBAs)(25-27) and one paper reported the economic evaluation of an included trial.(28) Two studies were from the US(23, 24) and five from the UK.(21, 22, 25-27)

Participants were majority female ranging from 59% to 75% with only one study reporting majority male participants (62%).(25) Mean age ranged from 43.2 to 71 years age. One study focused on adults over 75, but did not report mean age.(21) Three of the seven studies clearly reported including participants experiencing multimorbidity and deprivation. The two US trials tested an intervention that targeted people with two or more chronic conditions, living in a high poverty zip code.(23, 24) One U.K. study was based in GP practices located in postcodes with high deprivation and reported a mean of 3.1 self- reported chronic conditions.(26) Otherwise, studies recruited participants based on a combination of factors including: social isolation,(21, 25, 27) mental health problems,(25, 27) age (21, 25) and GP perception of suitability for the intervention.(22, 26, 27)



## Interventions and comparators

All interventions included referral to a link worker or equivalent, who identified a set of personalized goals and supported participants to achieve these through connecting with community resources. There was considerable variation in the duration and intensity of the link worker interventions. Intervention duration ranged from one month to two years, with most interventions ranging from three to nine months in duration. Intensity in terms of link worker caseload and number of contacts was only reported in detail in two of the seven studies. The IMPaCT intervention evaluated in the two US trials was six months duration with weekly contacts as standard. Each link worker worked with 55 clients per year for an average of 38.4 hours.(29) No other studies reported on link worker caseload. Other interventions were less intense in terms of number of contacts. Carnes et al reported that 69% of participants met the link worker once and 17% had two or more contacts.(27) Grant et al reported a mean of 1.7 contacts and Mercer et al a mean of 3.1 contacts.(22, 26) The remaining two studies did not report on numbers of contacts.(21, 25)

All link workers had professional supervision arrangements, which varied across studies. They were managed and employed by either a research team or a host voluntary community organisation. While efforts were made to standardise the IMPaCT intervention,(29) with regular supervision and reviews, the other interventions were very flexible and fidelity was not assessed. In some cases, there was considerable variation in how the intervention was implemented across sites, but this was part of a general tailored approach.(25, 26) The setting also varied. In three studies, link workers were embedded within general practice or equivalent.(24, 26, 27) In two of these studies one link worker was assigned to a practice. (24, 26) In the other, three link workers were based across 22 practices.(27) The link workers were based in community settings in the remaining four studies.

1  
2  
3 The comparator was usual care for all studies, with the inclusion of chronic disease goal  
4 setting as a co-intervention in two of the RCTs.(23, 24) The four RCTs randomized  
5 participants at the level of the individual. The three CBAs studies recruited controls from  
6 nearby GP practices with similar demographics. However, all of the CBAs reported  
7 significant differences in demographics and baseline outcome scores between intervention  
8 and control groups. See Table 1 for a summary of included studies.  
9  
10  
11  
12  
13  
14  
15  
16  
17

18 *Table 1. Summary of included study characteristics.*  
19  
20  
21  
22  
23  
24  
25  
26  
27  
28  
29  
30  
31  
32  
33  
34  
35  
36  
37  
38  
39  
40  
41  
42  
43  
44  
45  
46  
47  
48  
49  
50  
51  
52  
53  
54  
55  
56  
57  
58  
59  
60

| Study ID                                          | Participants                                                                                                                                                                                                     | Intervention                                                                                                                                                                                                                                                                                                                                                                                                                                                                                                                                                                                                                       | Outcomes                                                                                                                                                                                                                                                                                                                                                                                                                          |
|---------------------------------------------------|------------------------------------------------------------------------------------------------------------------------------------------------------------------------------------------------------------------|------------------------------------------------------------------------------------------------------------------------------------------------------------------------------------------------------------------------------------------------------------------------------------------------------------------------------------------------------------------------------------------------------------------------------------------------------------------------------------------------------------------------------------------------------------------------------------------------------------------------------------|-----------------------------------------------------------------------------------------------------------------------------------------------------------------------------------------------------------------------------------------------------------------------------------------------------------------------------------------------------------------------------------------------------------------------------------|
| <b>Randomised Trials</b>                          |                                                                                                                                                                                                                  |                                                                                                                                                                                                                                                                                                                                                                                                                                                                                                                                                                                                                                    |                                                                                                                                                                                                                                                                                                                                                                                                                                   |
| Clarke et al, 1992 (21)<br><br>Community, UK      | 523 adults over 75 living alone.<br><br>Age, gender not reported                                                                                                                                                 | <b>Referral:</b> Recruited via mail invitation<br><b>Linkworker:</b> Lay community-based health worker, training and experience not specified.<br><b>Contacts:</b> Minimum 3 home visits with tailored support<br><b>Duration:</b> 2 years<br><b>Type of support:</b> Tailored but fell into 4 categories: Social & social services, financial, housing & healthcare coordination<br><b>Comparator:</b> Usual care                                                                                                                                                                                                                 | <b>Primary outcome:</b> Survival<br><b>Secondary outcomes:</b> Activities of daily living<br>Information/orientation score<br>Loneliness<br>Morale<br>Self-rated health<br>Social contacts<br>Primary healthcare utilisation<br><b>Costs:</b> None reported<br><b>Data collection:</b> 0, 24 months. Survival assessed at 6 monthly intervals from baseline to 3.5 years                                                          |
| Grant et al, 2000 (22)<br><br>Community, UK       | 152 adults over 16 who GP felt would benefit from intervention.<br><br>Mean age 43.2, 75% female.                                                                                                                | <b>Referral:</b> Recruited via GP referral<br><b>Linkworker:</b> Lay "referral facilitator" trained and employed by a community organisation. Based in community.<br><b>Contacts:</b> 1 face-to-face assessment within a week of referral. Average of 1.7 telephone or face-to-face contacts reported.<br><b>Duration:</b> 1 month<br><b>Type of support:</b> Assessment and referral to appropriate community resources<br><b>Comparator:</b> Usual care                                                                                                                                                                          | <b>Primary Outcomes:</b> Mental health: depression and anxiety<br>Social Support<br><b>Secondary outcomes:</b> Quality of life<br>Functional health<br>Primary healthcare utilisation including medications and referrals<br><b>Costs:</b> Intervention<br>Primary healthcare utilisation<br>Referrals to other agencies<br><b>Data collection:</b> 0, 1, 4 months                                                                |
| Kangovi et al, 2018 (24)<br><br>Primary Care, USA | 592 adults attending 3 primary care clinics, who resided in a high-poverty zip code, were uninsured or publicly insured, and had a diagnosis for 2 or more chronic diseases.<br><br>Mean age 52.6. 62.5% female. | <b>Referral:</b> Recruited via primary care clinics<br><b>Linkworker:</b> Community health workers, with high school diploma. 1 month training in motivational interviewing, action planning and on the job. Based in primary care practices.<br><b>Contacts:</b> Monthly face-to-face meetings and weekly telephone check ins.<br><b>Duration:</b> 6 months<br><b>Type of support:</b> Tailored supports to achieve chronic disease goals set with PCP including: Action planning and coaching, health system navigation and advocacy, long term social supports<br><b>Comparator:</b> Chronic disease goal setting with PCP only | <b>Primary outcome:</b> Health related quality of life, physical health component (SF-12-V2 PCS)<br><b>Secondary outcomes:</b> Health related quality of life, mental health component (SF-12-V2 MCS)<br>Patient activation<br>Chronic disease control (BP, HbA1C, BMI or CPD)<br>Patient-reported quality of primary care<br>All cause hospitalisations<br><b>Costs:</b> None reported<br><b>Data Collection:</b> 0, 6, 9 months |
| Kangovi et al, 2017 (23)<br><br>Community, USA    | 302 adults attending GIM clinics, uninsured or publicly insured, living in deprived area, and were diagnosed with 2 or more chronic                                                                              | <b>Referral:</b> Recruited via primary care clinics<br><b>Linkworker:</b> Community health workers, with high school diploma. 1 month training in motivational interviewing, action planning and on the job. Based in primary care practices.<br><b>Contacts:</b> Monthly face-to-face meetings and weekly telephone check ins.<br><b>Duration:</b> 6 months<br><b>Type of support:</b> Tailored supports to achieve chronic disease goals set with PCP                                                                                                                                                                            | <b>Primary outcome:</b> Change in chronic disease control (HbA1C, BMI, BP, or CPD)<br><b>Secondary outcomes:</b> Achievement of chronic disease management goals<br>Health related quality of life (SF-12-V2 PCS and MCS)<br>Patient activation<br>Patient reported quality of primary care<br>All cause hospitalisations                                                                                                         |

|                                                 |                                                                                                                                                        |                                                                                                                                                                                                                                                                                                                                                                                                                                                                                                                                                                                                                                                                                            |                                                                                                                                                                                                                                                                                                                                                                                                                         |
|-------------------------------------------------|--------------------------------------------------------------------------------------------------------------------------------------------------------|--------------------------------------------------------------------------------------------------------------------------------------------------------------------------------------------------------------------------------------------------------------------------------------------------------------------------------------------------------------------------------------------------------------------------------------------------------------------------------------------------------------------------------------------------------------------------------------------------------------------------------------------------------------------------------------------|-------------------------------------------------------------------------------------------------------------------------------------------------------------------------------------------------------------------------------------------------------------------------------------------------------------------------------------------------------------------------------------------------------------------------|
|                                                 | diseases.<br><br>Mean age 56.<br>74% female                                                                                                            | including: Action planning and coaching, health system navigation and advocacy, long term social supports<br><b>Comparator:</b> Chronic disease goal setting with PCP only                                                                                                                                                                                                                                                                                                                                                                                                                                                                                                                 | <b>Costs:</b> Return on investment analysis reported on cost savings related to reduced hospitalisations ( <b>28</b> )<br><b>Data collection:</b> 0, 6 months for PROMs. 6 and 12 months for hospitalisations                                                                                                                                                                                                           |
| <b>Controlled Before After Studies</b>          |                                                                                                                                                        |                                                                                                                                                                                                                                                                                                                                                                                                                                                                                                                                                                                                                                                                                            |                                                                                                                                                                                                                                                                                                                                                                                                                         |
| <b>Study ID</b>                                 | <b>Participants</b>                                                                                                                                    | <b>Intervention</b>                                                                                                                                                                                                                                                                                                                                                                                                                                                                                                                                                                                                                                                                        | <b>Outcomes</b>                                                                                                                                                                                                                                                                                                                                                                                                         |
| Carnes et al, 2017 (27)<br><br>Primary Care, UK | 480 adults frequently attending primary care, who presented with social isolation or mild mental health problems.<br><br>Median age 56.<br>59% Female. | <b>Referral:</b> GP referral<br><b>Linkworker:</b> 3 lay “social prescribing coordinators” (SPC) trained in social work and managed by community organisation. Based across 22 GP practices. Additional support from volunteers available.<br><b>Contacts:</b> Initial 1 hour meeting and up to 6 sessions with the SPC, unlimited volunteer support<br><b>Duration:</b> 6 months<br><b>Type of support:</b> Assessment and well-being plan, referral and support to access community resources. Volunteers available to accompany to resources if required.<br><b>Comparator:</b> Propensity matched controls drawn from GP practices in nearby areas with no social prescribing service. | <b>Primary outcome:</b> Not specified<br><b>Secondary outcomes:</b><br>Self-rated health<br>Mental Health: depression and anxiety<br>Wellbeing<br>Positive and active engagement in life<br>Number of regular activities<br>A&E visits in past 3 months<br>Annual GP consultation rate<br>Number of medications in previous 6 months<br><b>Costs:</b> None reported<br><b>Data collection:</b> 0, 8 months              |
| Dickens et al, 2011 (25)<br><br>Community, UK   | 392 adults over 50 attending primary care at risk of social isolation.<br><br>Mean age 71.<br>62% male                                                 | <b>Referral:</b> GP referral<br><b>Linkworker:</b> Mentors often with teaching or creative skills, managed by a community organisation. Training not described. Based in community.<br><b>Contacts:</b> Face to face meetings, frequency not specified<br><b>Duration:</b> 3 months<br><b>Type of support:</b> Build confidence for personal social activities using personalised incremental goal setting<br><b>Comparator:</b> Matched controls from a sample drawn from 3 GP practices in nearby areas with no mentoring service                                                                                                                                                        | <b>Primary outcome:</b> Health related quality of life, mental health component (SF-12-V2 MCS)<br><b>Secondary outcomes:</b><br>Health related quality of life, physical health component (SF-12-V2 PCS)<br>Health related quality of life (EQ-5D-3L)<br>Mental health: depression<br>Social activities<br>Social support<br>Social participation<br><b>Costs:</b> None reported<br><b>Data collection:</b> 0, 3 months |
| Mercer et al, 2019 (26)<br><br>Primary Care, UK | 900 adults attending primary care in most deprived areas of Glasgow deemed suitable for intervention by GP.<br><br>Median age 49.<br>60% Female.       | <b>Referral:</b> GP referral<br><b>Linkworker:</b> Community links practitioners with prior experience of community work, managed by a community organisation. 1 month training on role, supporting clients, engaging practices and mapping resources. Based in GP practices.<br><b>Contacts:</b> Face to face meetings. Average of 3 meetings reported.<br><b>Duration:</b> 9 months<br><b>Type of support:</b> Assessment of needs and tailored support to connect with relevant community resources.<br><b>Comparator:</b> Sample drawn from 6 GP practices in Glasgow without a community links practitioner                                                                           | <b>Primary outcome:</b> Health related quality of life (EQ-5D-5L)<br><b>Secondary outcomes:</b><br>Wellbeing<br>Mental Health: depression and anxiety<br>Work and social adjustment scale<br>Self-reported lifestyle behaviors (smoking, alcohol, exercise)<br><br><b>Costs:</b> None reported<br><br><b>Data collection:</b> 0, 9 months                                                                               |

## Risk of Bias

We used the EPOC guidance to assess risk of bias for both RCTs and CBAs, but have reported them separately for each study design. The RCTs had low risk of bias overall, despite blinding of participants not being possible given the nature of the intervention. Randomization processes were not clearly reported in one RCT.<sup>(21)</sup> There was high risk of bias in the CBAs. This was due to differences in baseline characteristics and limitations in randomization and allocation concealment due to study design. A summary of the risk of bias is shown in Figure 2. The full risk of bias assessment for all outcomes is available in Appendix 4 in extended data.

## Certainty of Evidence

For the primary outcomes, the certainty across all study types was low for HRQoL and very low for mental health due to risk of bias, indirectness resulting from differences in interventions and populations across studies, inconsistencies in results and imprecision. The certainty was low for social supports, self-rated health and very low for physical function and activities. For health care utilization, there was low certainty evidence for hospitalisations based on the two RCTs of the IMPaCT intervention.<sup>(23, 24)</sup> There was low certainty evidence for primary care visits, due to indirectness, imprecision and risk of bias. See Table 2.

Table 2. Grade Summary of Findings

| <b>Title:</b> The effectiveness of link workers providing social prescribing on health outcomes and costs for adults in primary care and community settings<br><b>Patients or population:</b> Community dwelling adults<br><b>Settings:</b> Primary and community care<br><b>Intervention:</b> Social prescribing link workers<br><b>Comparison:</b> Usual care |                                                                                                                                            |                                     |                                                                              |
|-----------------------------------------------------------------------------------------------------------------------------------------------------------------------------------------------------------------------------------------------------------------------------------------------------------------------------------------------------------------|--------------------------------------------------------------------------------------------------------------------------------------------|-------------------------------------|------------------------------------------------------------------------------|
| Outcome                                                                                                                                                                                                                                                                                                                                                         | Review finding                                                                                                                             | Contributing studies (participants) | Overall GRADE assessment                                                     |
| Health related quality of life                                                                                                                                                                                                                                                                                                                                  | Link workers providing social prescribing may have little or no impact on HRQoL.                                                           | 2 RCTs (894).<br>2 CBAs (1292)      | ⊕⊕⊕⊖<br>Low<br>(Low for RCTs b, c, d. Low for CBAs )                         |
| Mental health                                                                                                                                                                                                                                                                                                                                                   | It is unknown if social prescribing link workers improve mental health because the certainty of the evidence is very low.                  | 1 RCT (152).<br>3 CBAs (1772)       | ⊕⊖⊖⊖<br>Very Low <sup>f</sup><br>(Low for RCT b,c and Very Low for CBAs a,b) |
| Social contacts and support                                                                                                                                                                                                                                                                                                                                     | Social prescribing link workers may lead to little or no difference in social contacts.                                                    | 2 RCTs (714).<br>1 CBA (392)        | ⊕⊕⊕⊖<br>Low<br>(Low for RCTs b,d, Low for CBAs)                              |
| Physical function and activities                                                                                                                                                                                                                                                                                                                                | It is unknown if social prescribing link workers improve physical function and activity because the certainty of the evidence is very low. | 2 RCTs (714)<br>2 CBAs (1380)       | ⊕⊖⊖⊖<br>Very low<br>(Very Low RCTs b,c,d and Very Low CBAs a,d)              |
| Self-rated health                                                                                                                                                                                                                                                                                                                                               | Social prescribing link workers may improve self-rated health.                                                                             | 2 RCTs (714)<br>1 CBA (480)         | ⊕⊕⊕⊖<br>Low<br>(Low RCTs <sup>b,c</sup> and Low CBA <sup>a</sup> )           |

|                                                    |                                                                                                                                                                                                                                                                                                                                                                                                                                                                                                                                                    |                                                                                                                                             |                             |                                                                                      |
|----------------------------------------------------|----------------------------------------------------------------------------------------------------------------------------------------------------------------------------------------------------------------------------------------------------------------------------------------------------------------------------------------------------------------------------------------------------------------------------------------------------------------------------------------------------------------------------------------------------|---------------------------------------------------------------------------------------------------------------------------------------------|-----------------------------|--------------------------------------------------------------------------------------|
| 1<br>2<br>3<br>4<br>5<br>6<br>7<br>8<br>9<br>10    | Health care utilisation: hospitalisation                                                                                                                                                                                                                                                                                                                                                                                                                                                                                                           | Link workers providing social prescribing via a structured intervention and within a specific health context may decrease hospitalisations. | 2 RCTs (894)                | ⊕⊕⊕⊕ <sup>b,c,e</sup><br>Low                                                         |
| 11<br>12<br>13<br>14<br>15<br>16<br>17<br>18       | Health care utilisation: primary care visits                                                                                                                                                                                                                                                                                                                                                                                                                                                                                                       | Social prescribing link workers may have little or no impact on primary care visits.                                                        | 2 RCTs (714)<br>1 CBA (480) | ⊕⊕⊕⊕<br>Low<br><br>(Low RCTs <sup>b,d</sup> ,<br>Very Low for<br>CBAs <sup>a</sup> ) |
| 19<br>20<br>21<br>22<br>23<br>24<br>25<br>26<br>27 | <p>RCTs and CBAs were assessed separately for each outcome. If there was limited RCT evidence then an overall judgement was applied. In this case if there were inconsistencies in results between the two bodies of evidence this was downgraded by one level.</p> <p><sup>a</sup> Downgraded for risk of bias . <sup>b</sup> Downgraded for indirectness. <sup>c</sup> Downgraded for Inconsistency. <sup>d</sup> Downgraded for imprecision. <sup>e</sup> Downgraded for publication bias <sup>f</sup> Downgraded for overall inconsistency</p> |                                                                                                                                             |                             |                                                                                      |

See Appendix 5 in extended data for the full GRADE summary sheet.

### Effectiveness of link worker interventions

#### Primary outcomes

Four of the seven studies (two RCTs and two CBAs) reported on HRQoL (23-26) . Two studies used the EQ-5D measure with one study reporting no difference, (26) while the other study reported a small significant difference between the intervention and control group, in favour of the control group. (25) Three studies used the SF-12 measure, with one of the three reporting a significant difference in favour of the intervention for the mental health component score, (23) whereas, none of the three studies reported any difference in physical component scores (23-25). Four studies reported on mental health (22, 25-27) using HADS-D, HADS-A or GDS-10. Only one of these studies reported evidence of a significant improvement in HADS-A, (aMD -1.9 (95% CI: -3.0 to -0.7).(22) The remaining three studies

found no evidence of a difference between groups for any mental health outcomes. See Table 3 for a summary of the primary outcome effects.

Table 3 Summary of review primary outcome effects

| <b>Health Related Quality of Life</b> |                                          |                                                      |
|---------------------------------------|------------------------------------------|------------------------------------------------------|
| <b>Study ID</b>                       | <b>Outcome measure</b>                   | <b>Adjusted mean differences (95% CI)</b>            |
| <b>Kangovi et al, 2018 RCT (24)</b>   | Physical Health Component (SF-12-V2 PCS) | -0.7 (-2.2 to 0.7) <sup>a</sup><br>P=0.3             |
|                                       | Mental Health Component (SF-12-V2 MCS)   | 0.8 (-1.1 to 2.6) <sup>a</sup><br>P=0.41             |
| <b>Kangovi et al, 2017 RCT (23)</b>   | Physical Health Component (SF-12-V2 PCS) | Int 0.9, Control 0.5*<br>P=0.66                      |
|                                       | Mental Health Component (SF-12-V2 MCS)   | Int 2.3, Control 0.2*<br>P=0.008                     |
| <b>Dickens et al 2011 CBA (25)</b>    | Physical Health Component (SF-12 PCS)    | 0.8 (-1.5, 3.2) <sup>b</sup><br>P=0.48               |
|                                       | Mental Health Component (SF-12 MCS)      | 0.1 (-1.9, 2.1) <sup>b</sup><br>P=0.9                |
|                                       | EQ-5D-3L                                 | -0.09 (-0.14, -0.03) <sup>b</sup><br>P=<0.001        |
| <b>Mercer et al, 2019 CBA (26)</b>    | EQ-5D-5L                                 | 0.008 (-0.028 to 0.045) <sup>c</sup><br>P=0.648      |
| <b>Mental Health</b>                  |                                          |                                                      |
| <b>Study ID</b>                       | <b>Outcome measure</b>                   | <b>Adjusted mean differences (95% CI)</b>            |
| <b>Grant et al, 2000 RCT (22)</b>     | Depression (HADS-D)                      | -0.9 (-1.9 to 0.2) <sup>d</sup><br>P=0.116           |
| <b>Carnes et al, 2017 CBA (27)</b>    | Depression (HADS-D)                      | 0.857 (-0.737, 2.451) <sup>e</sup><br>P=not reported |



|                                                                                                                                                                                                                                                                                                                                                                                                                                                                                                                                                                                                                                                                                                                                                                                                                                                                                                                                                                                                                                                                                                                                                                                                                                                                                                                                                                                                                                                                                                                                                                                             |                                                         |                                                       |
|---------------------------------------------------------------------------------------------------------------------------------------------------------------------------------------------------------------------------------------------------------------------------------------------------------------------------------------------------------------------------------------------------------------------------------------------------------------------------------------------------------------------------------------------------------------------------------------------------------------------------------------------------------------------------------------------------------------------------------------------------------------------------------------------------------------------------------------------------------------------------------------------------------------------------------------------------------------------------------------------------------------------------------------------------------------------------------------------------------------------------------------------------------------------------------------------------------------------------------------------------------------------------------------------------------------------------------------------------------------------------------------------------------------------------------------------------------------------------------------------------------------------------------------------------------------------------------------------|---------------------------------------------------------|-------------------------------------------------------|
| <b>Dickens et al, 2015 CBA (25)</b>                                                                                                                                                                                                                                                                                                                                                                                                                                                                                                                                                                                                                                                                                                                                                                                                                                                                                                                                                                                                                                                                                                                                                                                                                                                                                                                                                                                                                                                                                                                                                         | Depression (GDS-10)                                     | 0.2 (-0.2, 0.7) <sup>b</sup><br>P=0.29                |
| <b>Mercer et al, 2019 CBA (26)</b>                                                                                                                                                                                                                                                                                                                                                                                                                                                                                                                                                                                                                                                                                                                                                                                                                                                                                                                                                                                                                                                                                                                                                                                                                                                                                                                                                                                                                                                                                                                                                          | Depression (HADS-D)                                     | 0.09 (-0.49 to 0.68) <sup>c</sup><br>P=0.753          |
| <b>Grant et al, 2000 RCT (22)</b>                                                                                                                                                                                                                                                                                                                                                                                                                                                                                                                                                                                                                                                                                                                                                                                                                                                                                                                                                                                                                                                                                                                                                                                                                                                                                                                                                                                                                                                                                                                                                           | Anxiety (HADS-A)                                        | -1.9 (-3.0 to -0.7) <sup>a</sup><br>P=0.002           |
| <b>Carnes et al, 2017 CBA(27)</b>                                                                                                                                                                                                                                                                                                                                                                                                                                                                                                                                                                                                                                                                                                                                                                                                                                                                                                                                                                                                                                                                                                                                                                                                                                                                                                                                                                                                                                                                                                                                                           | Anxiety (HADS-A)                                        | -0.119 (-0.847, 1.609) <sup>e</sup><br>P=not reported |
| <b>Mercer et al, 2019 CBA (26)</b>                                                                                                                                                                                                                                                                                                                                                                                                                                                                                                                                                                                                                                                                                                                                                                                                                                                                                                                                                                                                                                                                                                                                                                                                                                                                                                                                                                                                                                                                                                                                                          | Anxiety (HADS-A)                                        | -0.41 (-0.99 to 0.18) <sup>c</sup><br>P=0.172         |
| <b>Clarke et al, 1992 RCT (21)</b>                                                                                                                                                                                                                                                                                                                                                                                                                                                                                                                                                                                                                                                                                                                                                                                                                                                                                                                                                                                                                                                                                                                                                                                                                                                                                                                                                                                                                                                                                                                                                          | HRQoL or Mental Health were not outcomes for this trial |                                                       |
| <p>SF-12v2= Short Form Health Survey, is often used as a health related quality of life measure, with Physical (PCS) and Mental (MCS) health components reported separately on a scale of 0-100 with 100 representing maximal health. EQ-5D-5L=a standardized measure of self-reported health-related quality of life that assesses 5 dimensions at 5 levels of severity where 1 is the preferred state of health. EQ-5D-3L=an earlier version of EQ-5D-5L with 3 levels. GDS =Geriatric Depression Scale, a screening tool for depression in older people with a score of 4 or more indicating possible depression. HADS = Hospital Anxiety and Depression Scale measured on a scale of 0-42 where a higher score indicates worse mental health. HADS-A=Hospital Anxiety and Depression Scale, Anxiety, where a score above 10 indicates possible caseness; HADS-D=Hospital Anxiety and Depression Scale, Depression, where a score above 10 indicates possible caseness.</p> <p>. * Unadjusted mean difference- adjusted mean differences not reported <sup>a</sup> Longitudinal estimated difference in difference from 6 to 9 months adjusted for site and chronic disease. <sup>b</sup> Adjusted for employment status, accommodation type and living circumstances. <sup>c</sup> Adjusted for age, sex, SIMD, comorbidity, and significant baseline outcome measures as covariates and includes practice identifier as a random effects term. <sup>d</sup> Adjusted for baseline results <sup>e</sup> Adjusted for age, sex, ethnicity, employment status and living arrangement.</p> |                                                         |                                                       |

## Secondary outcomes

A wide range of other outcomes was reported, with the studies reporting a mean of six outcomes each, including a range of patient reported outcomes (PROMS). Three reported on a measure of social contact or support and found no evidence of a difference between groups (21, 22, 25). One study reported that intervention participants were more likely to rate getting along with others as “worse” than controls, indicating a possible negative effect (25). In terms of other PROMs, two studies found a positive impact on self-rated health (21, 22), one study found a positive effect for general quality of life, assessed by the Delighted Terrible Faces

1  
2  
3 scale (22) and two studies reported a positive finding on patient rating of high quality care  
4 (23, 24). There were no reported differences for patient activation (23, 24), wellbeing (26,  
5 27), loneliness (21), morale (21), work and social adjustment (26) or active participation in  
6 life (27). Of the four studies that reported a measure of physical activity and function, one  
7 study found an improvement in functional health (22), while two others found no evidence of  
8 a difference in ADLs (21), or physical activity (26) and the final study found a reduction in  
9 usual activities (27). Three studies reported clinical outcomes, one reported on survival over a  
10 three year period (21) and two looked at chronic disease control for smoking, diabetes,  
11 obesity and hypertension (23, 24). None reported a statistically significant difference between  
12 groups.  
13  
14  
15  
16  
17  
18  
19  
20  
21  
22  
23  
24  
25  
26  
27  
28  
29  
30  
31  
32  
33  
34  
35  
36  
37  
38  
39  
40  
41  
42  
43  
44  
45  
46  
47  
48

49  
50  
51  
52  
53  
54  
55  
56  
57  
58  
59  
60

Five studies reported on health care utilization, with three reporting on primary care utilization (21, 22, 27) and two on hospitalisations (23, 24). One study reported a reduction in primary care attendances in the intervention group, but the control group were significantly different and the authors concluded that their findings more likely represented regression to the mean (27); the remaining two studies found no evidence of an effect on primary health care attendances. One of the two US studies found a 24 % risk reduction in repeat hospital admissions during the 12 month follow up period (24); the other US study reported a similar reduction, but it did not reach statistical significance (23). See Appendix 6 in extended data for a full list of outcomes and effects for each study.

### **Costs and cost effectiveness**

No cost utility or cost effectiveness analyses were identified in our search. Two RCTs reported on costs (22, 28); one as a cost analysis and the other as a separately published return on investment analysis of an included RCT (23). The cost analysis looked at primary care visits, medications, referrals and interventions costs. While the study found a reduction

1  
2  
3 in healthcare costs due to a reduction in referrals, these savings did not offset the costs of the  
4  
5 intervention. Therefore, the authors concluded that the intervention was more costly than  
6  
7 usual care. The analysis did not consider any measure of health benefits to participants such  
8  
9 as quality of life years gained.(22) The return on investment study examined cost savings  
10  
11 related to hospitalisations and outpatient attendances from routine data and included detailed  
12  
13 costing of the intervention, which was calculated at \$1721.06 per participant. While the  
14  
15 number of reduced hospital days was statistically non-significant, they estimated a return of  
16  
17 \$2.47 for every \$1 spent on the intervention.(28)  
18  
19  
20  
21  
22  
23  
24

### 25 **Subgroup synthesis- Multimorbidity and social deprivation**

26  
27  
28  
29 Three of the seven studies reported number of chronic conditions. Two of these were RCTs  
30  
31 of the IMPaCT intervention in the US and recruited participants with two or more chronic  
32  
33 conditions including hypertension, diabetes, obesity and tobacco dependence.(23, 24) The  
34  
35 other was a CBA of the Glasgow Deep End link worker intervention and reported a mean of  
36  
37 3.1 chronic conditions in the intervention group, but this was not an inclusion criterion.(26)  
38  
39 All three of these studies targeted participants in areas of deprivation. Within these  
40  
41 multimorbidity studies, there was no conclusive effect on HRQoL, with two of the studies  
42  
43 finding no effect and one of the US trials finding an effect on the Mental Health Component  
44  
45 of the SF-12-V2 only,(23) which was not replicated in the second trial of this  
46  
47 intervention.(24) Only the Deep End link worker CBA reported on mental health and found  
48  
49 no evidence of a difference between groups. There were no reported significant effects on  
50  
51 other patient reported outcome measures or chronic disease control. The RCTs of the  
52  
53 IMPaCT intervention found a consistent improvement in the proportion of participants  
54  
55 reporting high quality primary care. Both also examined hospitalisations, reporting fewer  
56  
57  
58  
59  
60

1  
2  
3 total days in hospital, although this only reached statistical significance in one of the two  
4  
5 studies.  
6  
7

## 8 9 **DISCUSSION**

10  
11 We identified seven studies and one economic evaluation of an included study, but found no  
12  
13 consistent evidence to support the effectiveness of link worker interventions for improving  
14  
15 health related quality of life or mental health. There was no evidence for effectiveness in  
16  
17 improving social support, physical function and activities, or primary healthcare utilization,  
18  
19 though there was a suggestion from two studies that interventions led to improved self-rated  
20  
21 health and two others reported higher patient ratings for quality care. Three of the studies  
22  
23 specifically included participants experiencing multimorbidity and social deprivation with  
24  
25 similar findings for health related quality of life, though two U.S. RCTs reported a reduction  
26  
27 in total days in hospital for people with multimorbidity with low certainty evidence. The  
28  
29 certainty of the evidence is low or very low overall due to risk of bias, heterogeneity  
30  
31 amongst studies, inconsistency and imprecision.  
32  
33  
34  
35  
36  
37

38 Our systematic review has not identified any evidence on the cost effectiveness of social  
39  
40 prescribing. There is some evidence of cost savings based on reduced hospitalisations, but  
41  
42 this was a US based study of an intense structured six-month intervention and may not  
43  
44 translate to other healthcare systems.(28) Only one UK based study reported costs, showing a  
45  
46 reduction in referral costs, but no cost benefit analysis or cost utility analysis was  
47  
48 undertaken.(22) The economic evaluation of social prescribing in the literature is weak.  
49  
50  
51

52 There remains a lack of studies with a randomized design since the 2017 review (10) that  
53  
54 called for “less rhetoric and more reality”. There have been many uncontrolled before after  
55  
56 studies identified in subsequent reviews, (11, 12, 30) but the last RCT in a UK setting was  
57  
58 over 20 years ago. (22) Widening our search beyond the UK setting resulted in the  
59  
60

1  
2  
3 identification of two relevant RCTs and a return on investment analysis in a US setting. (23,  
4  
5 24, 28) Ours is the first review to look specifically at populations experiencing  
6  
7 multimorbidity or deprivation. We identified some evidence to support reduced hospital  
8  
9 admissions for people experiencing multimorbidity and deprivation in the US. Two of these  
10  
11 studies also found an improvement in patients rating of the quality of their primary care,  
12  
13 which has been reported in previous multimorbidity studies. (31). The 2021 systematic  
14  
15 review of multimorbidity highlighted the potential for interventions to improve patients  
16  
17 experience of care, (7) which some have argued should be an end in itself. (32). We reported  
18  
19 on the intensity of the intervention, often omitted from previous reviews and indeed in many  
20  
21 of the articles in this review. While intensity varied, a more intense intervention with a  
22  
23 healthcare coordination component was the only one with a positive impact on healthcare  
24  
25 utilisation.(28) Setting also varied, with some link workers embedded in general practice,  
26  
27 which may facilitate healthcare coordination.  
28  
29  
30  
31  
32  
33

34 The main outcomes for the current review were HRQoL and mental health based on the core  
35  
36 outcome set in multimorbidity (17), but only two of the seven studies reported on both of  
37  
38 these (25, 26). With one exception (21) the rest reported on at least one. Most studies did  
39  
40 cover some of the NHS draft outcome framework for social prescribing recommended  
41  
42 outcomes: wellbeing, social connectedness, ability to manage day-to-day and physical  
43  
44 activity. (3) However, as per previous reviews (10, 11, 33) there was a lot of variation in  
45  
46 outcomes included and how they were measured, making it difficult to synthesise studies and  
47  
48 further weakening the evidence.  
49  
50  
51  
52

### 53 **Strengths and Limitations**

54  
55

56 This review involved a rigorous search of the international literature including all languages  
57  
58 and the Grey Literature. We used a wide range of terms to describe the link worker role,  
59  
60

1  
2  
3 providing additional evidence on link worker social prescribing interventions. We had robust  
4 study design inclusion criteria and only included studies that met the Cochrane EPOC  
5 guidance for inclusion in a systematic review.(19) Additional potentially eligible studies did  
6 not meet the inclusion criteria for this review due to non-contemporaneous comparisons, too  
7 few sites or offering some sort of social prescribing intervention to control groups.(34-36)  
8 Previous reviews have included uncontrolled studies with the argument that they are used by  
9 policy makers as evidence of effectiveness,(12) however, including these studies with weaker  
10 designs can lead to inflated effect sizes and distort the current evidence base. Unlike previous  
11 reviews, (10-12, 30, 37) we appraised the overall certainty of the evidence for our selected  
12 outcomes, which was low or very low for most outcomes. This review provides the most up  
13 to date review of evidence internationally for link worker social prescribing interventions.  
14

15  
16 Due to the complex nature of link worker interventions, there may have been a degree of  
17 subjectivity in determining which ones to include. To minimize this all full texts were  
18 independently reviewed and where there was a question over intervention inclusion, it was  
19 discussed with a third author. Our protocol made it clear that it was important that social  
20 prescribing was the main element of the intervention, but interpretation of this is also  
21 dependent on reporting in potentially eligible studies (38). The field is rapidly expanding and  
22 we may have missed studies published since July 2021. Our forward citation search carried  
23 out in September 2021 will go some way to mitigate this. We are also aware of protocols that  
24 have not published results or were suspended due to COVID-19, including an RCT that we  
25 have conducted with analysis ongoing.(39)  
26  
27

### 28 **Implications for policy and practice**

29  
30 It could be argued that only four of the studies tested interventions that reflect the format of  
31 current social prescribing activities in the UK, which are relatively short and tailored to the  
32  
33  
34  
35  
36  
37  
38  
39  
40  
41  
42  
43  
44  
45  
46  
47  
48  
49  
50  
51  
52  
53  
54  
55  
56  
57  
58  
59  
60

1  
2  
3 individual and locality, with a high degree of flexibility (22, 25-27). Even among these, there  
4  
5 is variation in terms of the intensity of support and link worker location, with both  
6  
7 community and primary care settings. Embedding link workers in a general practice setting  
8  
9 can facilitate more intense support and a focus on healthcare coordination, such as in the US  
10  
11 IMPaCT intervention.(29) One of the UK studies reported that a sub-group of participants  
12  
13 who met a link worker three or more times had improvements in HRQoL, mental health and  
14  
15 exercise, suggesting intervention duration and intensity is important to consider.(26) Current  
16  
17 plans for social prescribing in Ireland and the UK suggest at least double the linkworker  
18  
19 caseload of the IMPaCT intervention, (40, 41) and a shorter intervention, that may limit link  
20  
21 worker capacity to provide the level of support required to provide benefit, particularly for  
22  
23 people with multimorbidity living in deprived areas. There is a need to consider greater  
24  
25 flexibility in how new link worker social prescribing interventions are implemented until  
26  
27 more evidence is available on how much and what type of support is required.  
28  
29  
30  
31  
32  
33

34 Policy makers need to be aware that there is insufficient evidence to assess the effectiveness  
35  
36 of social prescribing and none on the cost effectiveness so the opportunity cost is unknown.  
37  
38 While it is anticipated that social prescribing will reduce healthcare utilization at the primary  
39  
40 care level (9), many evaluation of social prescribing services struggle to get access to  
41  
42 healthcare utilisation data.(42) Going forward robust evaluations with both patient reported  
43  
44 outcome data and access to healthcare utilisation data to assist economic evaluations need to  
45  
46 be embedded into social prescribing programmes.  
47  
48  
49

50  
51 The PPI group felt a flexible approach was necessary as some people may need longer  
52  
53 support, but it would not be fair to exclude those who have less complex needs who could  
54  
55 benefit from shorter interventions. They agreed with the author team's conclusions that social  
56  
57 prescribing should not be rolled out more widely without evaluations built in and also felt  
58  
59 that outcomes and the way they were measured should be decided with patient input.  
60

### Implications for future research

For future research and evaluations to address the evidence gap a number of challenges need to be overcome. Social prescribing interventions are meant to be flexible and tailored, not just to the individual, but also the context. This however results in a lot of heterogeneity and difficulty in assessing an overall body of evidence. Future studies could address this by reporting on reasons for referral, caseload, duration of intervention, number of contacts and link worker caseload. Further research is also needed to better understand the components of social prescribing and indeed is underway.(43)

There are no agreed outcomes or measures for social prescribing. The NHS does not recommend any specific measures, although for personalized care it does recommend using the patient activation measure (PAM), (44) which was not used in any UK studies in this review, although it is relatively new. The Health Service Executive in Ireland also recommends assessing wellbeing and social connectedness, but not mental health or HRQoL (42). Without the inclusion of a measure that can be used for cost utility analysis, building the evidence base around cost effectiveness will be challenging. The EuroQoL HRQoL measure, EQ-5D-5L (45), is one such measure, but it can be difficult to show changes in a relatively short timeframe (46) and is quite health focused whereas social prescribing has potentially wider social benefits. The ICECAP-A (The ICEpop CAPability measure for Adults) is an alternative. (47) It measures capability well-being, can be used in economic evaluations and is recommended by NICE for use in evaluations of interventions with potential health and social benefits. (48) Future studies should consider its inclusion as an outcome. The Medical Research Council Framework for the Evaluation of Complex Intervention to Improve Health Outcomes recommends multiple outcome measures. In the case of social prescribing a more refined outcomes framework with specified measures developed with input from service users, providers and academics is needed.



1  
2  
3 The widespread policy of rolling out social prescribing projects regardless of the lack of  
4 certainty around cost effectiveness makes it challenging for researchers to address the  
5 evidence gap, especially in identifying suitable controls. While some CBAs in this review  
6 attempted to match controls, there were often significant differences in baseline  
7 characteristics as controls were drawn from different populations. (25, 27) Where social  
8 prescribing has already been adopted by policy makers stepped wedge cluster RCTs and  
9 interrupted time series offer an alternative approach to CBAs and can control better for  
10 confounding. (49) Other jurisdictions considering implementing social prescribing should  
11 carefully consider how they evaluate it from inception. RCTs are feasible as shown by the  
12 trials in the review. It is clear, however, that further uncontrolled before after studies will not  
13 advance the evidence base.  
14  
15  
16  
17  
18  
19  
20  
21  
22  
23  
24  
25  
26  
27  
28  
29  
30  
31  
32  
33  
34

## 35 CONCLUSIONS

36  
37  
38 Our systematic review suggests that link workers providing social prescribing may have little  
39 or no impact on HRQoL, mental health or a range of patient reported outcomes though may  
40 improve self-rated health. For patients with multimorbidity in areas of deprivation an  
41 intensive link worker intervention probably improves patients' ratings of high quality primary  
42 care and reduces hospitalisations, but these findings are based on two studies in the US and  
43 require evaluation in other health systems. The opportunity costs of investing in social  
44 prescribing may be considerable and it is essential that high quality trials determining cost  
45 effectiveness are conducted so that the evidence can catch up with the policy and we avoid  
46 wasting valuable time and resources.  
47  
48  
49  
50  
51  
52  
53  
54  
55  
56  
57  
58  
59  
60

## COMPETING INTERESTS

The authors declare that they have no competing interests.

## ETHICS STATEMENT

This study did not involve human or animal subjects and did not require ethical approval.

## FUNDING

This research was funded by the Health Research Board Ireland (Grant reference HRB CDA 2018 Reference CDA-2018-003). The funders did not have any role in the design of this study.

## DATA AVAILABILITY

Extended and supplementary data are available on the Open Science Framework:

Effectiveness of link workers providing social prescribing on health outcomes and costs for adult patients in primary care and community settings. A protocol for a systematic review of the literature. Extended Data.

<https://osf.io/p5nv2/#:~:text=DOI%2010.17605/OSF.IO/P5NV2>

This project contains the following extended data:

- Appendix 1: PRISMA checklist for “A systematic review of the effectiveness of link workers providing social prescribing on health outcomes and costs for adults in primary care and community settings.”
- Appendix 2: Pubmed Search Strategy for Effectiveness of link workers systematic review.docx (PubMed search strategy)
- Appendix 3: GRIPP 2 Form for PPI

- Appendix 4: Risk of Bias tables
- Appendix 5: GRADE Assessment Sheets
- Appendix 6: All outcomes table
- <https://doi.org/10.17605/OSF.IO/X6V2K>

Data are available under the terms of the [Creative Commons Zero “No rights reserved” data waiver](#) (CC0 1.0 Public domain dedication).

## CONTRIBUTORSHIP STATEMENT

BK was the primary reviewer and designed and conducted the search, reviewed identified texts, extracted data, performed the narrative synthesis and wrote the main draft. AC was a second reviewer of identified texts and for the quality assessment. MOS performed citation searches, verified data extraction and was second reviewer for certainty of evidence assessment. FB provided statistical support, wrote the protocol for meta-analysis and advised on feasibility of same. EOS provided health economics expertise and advised on identification and summary of cost analysis studies. DC provided input into the search protocol, in particular descriptions and definitions of the link worker role. SMS conceptualised the original review questions, was involved in designing methods of the review and acted as a third reviewer. All authors contributed to critique and revisions of draft manuscripts and have approved the final version.

## ACKNOWLEDGMENTS

Paul J Murphy MLIS, Information Specialist, Royal College of Surgeons Ireland Library, 26 York Street, D02 YN77. Advised on search strategies.

## FIGURE LEGENDS

Figure 1. PRISMA Flow Diagram

1  
2  
3 Figure 2. Risk of Bias Summary  
4  
5  
6

7 **REFERENCES**  
8  
9  
10

- 11 1. Polley MJ, Fleming, J., Anfilogoff, T. and Carpenter, A. Making sense of Social Prescribing. London: Univeristy of Westminster; 2017 18/08/2017.
- 12 2. NHS. NHS Careers: Social Prescribing Link worker NHS Careers: NHS;
- 13 2021 [Available from: [https://www.healthcareers.nhs.uk/explore-roles/wider-healthcare-](https://www.healthcareers.nhs.uk/explore-roles/wider-healthcare-team/roles-wider-healthcare-team/clinical-support-staff/social-prescribing-link-worker/social-prescribing-link-worker)
- 14 [team/roles-wider-healthcare-team/clinical-support-staff/social-prescribing-link-worker/social-](https://www.healthcareers.nhs.uk/explore-roles/wider-healthcare-team/roles-wider-healthcare-team/clinical-support-staff/social-prescribing-link-worker/social-prescribing-link-worker)
- 15 [prescribing-link-worker](https://www.healthcareers.nhs.uk/explore-roles/wider-healthcare-team/roles-wider-healthcare-team/clinical-support-staff/social-prescribing-link-worker/social-prescribing-link-worker).
- 16 3. NHS. Social Prescribing England: NHS; 2020 [Available from:
- 17 <https://www.england.nhs.uk/personalisedcare/social-prescribing/>.
- 18 4. Wallace E, Salisbury C, Guthrie B, Lewis C, Fahey T, Smith SM. Managing patients with
- 19 multimorbidity in primary care. *BMJ*. 2015;350.
- 20 5. Payne RA, Abel GA, Guthrie B, Mercer SW. The effect of physical multimorbidity, mental
- 21 health conditions and socioeconomic deprivation on unplanned admissions to hospital: a
- 22 retrospective cohort study. *CMAJ : Canadian Medical Association journal = journal de l'Association*
- 23 *medicale canadienne*. 2013;185(5):E221-8.
- 24 6. Barnett K, Mercer SW, Norbury M, Watt G, Wyke S, Guthrie B. Epidemiology of
- 25 multimorbidity and implications for health care, research, and medical education: a cross-sectional
- 26 study. *Lancet*. 2012;380(9836):37-43.
- 27 7. Smith SM, Wallace E, Clyne B, Boland F, Fortin M. Interventions for improving outcomes in
- 28 patients with multimorbidity in primary care and community setting: a systematic review. *Systematic*
- 29 *Reviews*. 2021;10(1):271.
- 30 8. Husk K, Elston J, Gradinger F, Callaghan L, Asthana S. Social prescribing: where is the
- 31 evidence? *The British journal of general practice : the journal of the Royal College of General*
- 32 *Practitioners*. 2019;69(678):6-7.
- 33 9. Drinkwater C, Wildman J, Moffatt S. Social prescribing. *BMJ*. 2019;364:l1285.
- 34 10. Bickerdike L, Booth A, Wilson PM, Farley K, Wright K. Social prescribing: less rhetoric and
- 35 more reality. A systematic review of the evidence. *BMJ Open*. 2017;7(4).
- 36 11. Pescheny JV, Randhawa G, Pappas Y. The impact of social prescribing services on service
- 37 users: a systematic review of the evidence. *Eur J Public Health*. 2020;30(4):664-73.
- 38 12. Vidovic D, Reinhardt GY, Hammerton C. Can Social Prescribing Foster Individual and
- 39 Community Well-Being? A Systematic Review of the Evidence. *International journal of*
- 40 *environmental research and public health*. 2021;18(10):5276.
- 41 13. Cochrane. Cochrane Effective Practice and Organisation of Care (EPOC): Cochrane; 2017
- 42 [Available from: [https://epoc.cochrane.org/sites/epoc.cochrane.org/files/public/uploads/Resources-](https://epoc.cochrane.org/sites/epoc.cochrane.org/files/public/uploads/Resources-for-authors2017/what_study_designs_should_be_included_in_an_epoc_review.pdf)
- 43 [for-authors2017/what\\_study\\_designs\\_should\\_be\\_included\\_in\\_an\\_epoc\\_review.pdf](https://epoc.cochrane.org/sites/epoc.cochrane.org/files/public/uploads/Resources-for-authors2017/what_study_designs_should_be_included_in_an_epoc_review.pdf).
- 44 14. Moher D, Liberatia A, Tetzlaff J, Altman D. Preferred Reporting Items for Systematic Reviews
- 45 and Meta-Analyses: The PRISMA Statement. *PLoS Med*. 2009;6(7).
- 46 15. Smith S. Interventions for improving outcomes in patients with multimorbidity in primary
- 47 care and community settings - Smith, SM - 2016 | Cochrane Library. Cochrane Library of Systematic
- 48 *Reviews*. 2016.
- 49 16. Butler DC, Petterson S, Phillips RL, Bazemore AW. Measures of social deprivation that predict
- 50 health care access and need within a rational area of primary care service delivery. *Health services*
- 51 *research*. 2013;48(2 Pt 1):539-59.
- 52 17. Smith SM, Wallace E, Salisbury C, Sasseville M, Bayliss E, Fortin M. A Core Outcome Set for
- 53 Multimorbidity Research (COSmm). *Ann Fam Med*. 2018;16(2):132-8.
- 54  
55  
56  
57  
58  
59  
60

18. Craig P, Dieppe P, Macintyre S, Michie S, Nazareth I, Petticrew M. Developing and evaluating complex interventions: the new Medical Research Council guidance. *BMJ*. 2008;337.
19. Cochrane. Cochrane Effective Practice and Organisation of Care (EPoC) Resources for review authors 2017 [Available from: [epoc.cochrane.org/resources/epoc-resources-review-authors](http://epoc.cochrane.org/resources/epoc-resources-review-authors)].
20. GRADE. Grade Working Group 2019 [Available from: <http://www.gradeworkinggroup.org/>].
21. Clarke M, Clarke SJ, Jagger C. Social Intervention and the Elderly: A Randomized Controlled Trial. *American Journal of Epidemiology*. 1992;136(12):1517-23.
22. Grant C, Goodenough T, Harvey I, Hine C. A randomised controlled trial and economic evaluation of a referrals facilitator between primary care and the voluntary sector. *BMJ*. 2000;320.
23. Kangovi S, Mitra N, Grande D, Huo H, Smith RA, Long JA. Community Health Worker Support for Disadvantaged Patients With Multiple Chronic Diseases: A Randomized Clinical Trial. *Am J Public Health*. 2017;107(10):1660-7.
24. Kangovi S, Mitra N, Norton L, Harte R, Zhao X, Carter T, et al. Effect of Community Health Worker Support on Clinical Outcomes of Low-Income Patients Across Primary Care Facilities: a Randomized Clinical Trial. *JAMA internal medicine*. 2018;178(12):1635-43.
25. Dickens AP, Richards SH, Hawton A, Taylor RS, Greaves CJ, Green C, et al. An evaluation of the effectiveness of a community mentoring service for socially isolated older people: a controlled trial. *BMC public health*. 2011;11:218-.
26. Mercer SW, Fitzpatrick B, Grant L, Chng NR, McConnachie A, Bakhshi A, et al. Effectiveness of Community-Links Practitioners in Areas of High Socioeconomic Deprivation. *Ann Fam Med*. 2019;17(6):518-25.
27. Carnes D, Sohanpal R, Frostick C, Hull S, Mathur R, Netuveli G, et al. The impact of a social prescribing service on patients in primary care: a mixed methods evaluation. *BMC Health Services Research*. 2017;17:1-9.
28. Kangovi S, Mitra N, Grande D, Long JA, Asch DA. Evidence-Based Community Health Worker Program Addresses Unmet Social Needs And Generates Positive Return On Investment. *Health Affairs*. 2020;39(2):207-13.
29. Kangovi S, Carter T, Charles D, Smith RA, Glanz K, Long JA, et al. Toward A Scalable, Patient-Centered Community Health Worker Model: Adapting the IMPaCT Intervention for Use in the Outpatient Setting. *Popul Health Manag*. 2016;19(6):380-8.
30. Reinhardt GY, Vidovic D, Hammerton C. Understanding Loneliness: a systematic review of the impact of social prescribing initiatives on loneliness. *Perspectives in Public Health*. 2021;141(4):204-13.
31. Salisbury C, Man MS, Bower P, Guthrie B, Chaplin K, Gaunt DM, et al. Management of multimorbidity using a patient-centred care model: a pragmatic cluster-randomised trial of the 3D approach. *Lancet*. 2018;392(10141):41-50.
32. Dowrick C. Patient-centred care for multimorbidity: an end in itself? *Lancet*. 2018;392(10141):4-5.
33. Thomas G, Lynch M, Spencer LH. A Systematic Review to Examine the Evidence in Developing Social Prescribing Interventions That Apply a Co-Productive, Co-Designed Approach to Improve Well-Being Outcomes in a Community Setting. *International journal of environmental research and public health*. 2021;18(8):3896.
34. Maughan DL, Patel A, Parveen T, Braithwaite I, Cook J, Lillywhite R, et al. Primary-care-based social prescribing for mental health: an analysis of financial and environmental sustainability. *Prim Health Care Res Dev*. 2016;17(2):114-21.
35. Foster A, Thompson J, Holding E, Ariss S, Mukuria C, Jacques R, et al. Impact of social prescribing to address loneliness: A mixed methods evaluation of a national social prescribing programme. *Health & Social Care in the Community*. 2021;29(5):1439-49.
36. Embick ER, Maeng DD, Juskiewicz I, Cerulli C, Crean HF, Wittink M, et al. Demonstrated health care cost savings for women: findings from a community health worker intervention designed to address depression and unmet social needs. *Archives of women's mental health*. 2020.

- 1  
2  
3 37. Costa A, Sousa C, Seabra PRC, Virgolino A, Santos O, Lopes J, et al. Effectiveness of Social  
4 Prescribing Programs in the Primary Health-Care Context: A Systematic Literature Review. .  
5 Sustainability 2021;13(2731).  
6  
7 38. Kiely B CA, O'Shea E et al. . Effectiveness of link workers providing social prescribing on  
8 health outcomes and costs for adult patients in primary care and community settings. A protocol for  
9 a systematic review of the literature. [version 2; peer review: 2 approved]. . HRB Open Res  
10 2020;2(21).  
11 39. Kiely B, Clyne B, Boland F, Donnell P, Connolly D, Shea E, et al. Link workers providing social  
12 prescribing and health and social care coordination for people with multimorbidity in socially  
13 deprived areas (the LinkMM trial): protocol for a pragmatic randomised controlled trial. BMJ Open.  
14 2021;11(2):e041809.  
15 40. NHS. NHS Long Term Plan: NHS; 2019 [Available from: <https://www.longtermplan.nhs.uk>.  
16 41. HSE. HSE Social Prescribing Framework 2021 [Available from:  
17 <https://www.hse.ie/eng/about/who/healthwellbeing/our-priority-programmes/mental-health-and-wellbeing/hse-social-prescribing-framework.pdf>.  
18 42. HSE. Building the capacity for the evaluation of social prescribing. Evaluability assessment. :  
19 HSE; 2020 [Available from: <https://www.hse.ie/eng/about/who/healthwellbeing/our-priority-programmes/mental-health-and-wellbeing/building-capacity-for-the-evaluation-of-social-prescribing-evaluability-assessment.pdf>.  
20 43. Tierney S, Mahtani KR. Understanding the implementation of link workers in primary care: A  
21 realist evaluation to inform current and future policy: NIHR; 2021 [Available from:  
22 <https://fundingawards.nihr.ac.uk/award/NIHR130247>.  
23 44. Hibbard JH, Stockard J, Mahoney ER, Tusler M. Development of the Patient Activation  
24 Measure (PAM): conceptualizing and measuring activation in patients and consumers. Health  
25 services research. 2004;39(4 Pt 1):1005-26.  
26 45. Gusi N, Olivares PR, Rajendram R. The EQ-5D Health-Related Quality of Life Questionnaire.  
27 In: Preedy VR, Watson RR, editors. Handbook of Disease Burdens and Quality of Life Measures. New  
28 York, NY: Springer New York; 2010. p. 87-99.  
29 46. Fortin M, Stewart M, Ngangue P, Almirall J, Bélanger M, Brown JB, et al. Scaling Up Patient-  
30 Centered Interdisciplinary Care for Multimorbidity: A Pragmatic Mixed-Methods Randomized  
31 Controlled Trial. Ann Fam Med. 2021;19(2):126-34.  
32 47. Al-Janabi H, N Flynn T, Coast J. Development of a self-report measure of capability wellbeing  
33 for adults: the ICECAP-A. Quality of Life Research. 2012;21(1):167-76.  
34 48. NICE. Developing NICE Guidelines: the manual London: National Institute for Health and  
35 Care Excellence; 2014 [updated 15/10/2020. Available from:  
36 <https://www.nice.org.uk/process/pmg20/chapter/incorporating-economic-evaluation>.  
37 49. Schünemann HJ, Cuello C, Akl EA, Mustafa RA, Meerpohl JJ, Thayer K, et al. GRADE  
38 guidelines: 18. How ROBINS-I and other tools to assess risk of bias in nonrandomized studies should  
39 be used to rate the certainty of a body of evidence. Journal of clinical epidemiology. 2019;111:105-  
40 14.  
41  
42  
43  
44  
45  
46  
47  
48  
49  
50  
51  
52  
53  
54  
55  
56  
57  
58  
59  
60

PRISMA 2020 flow diagram for new systematic reviews which included searches of databases, registers and other sources

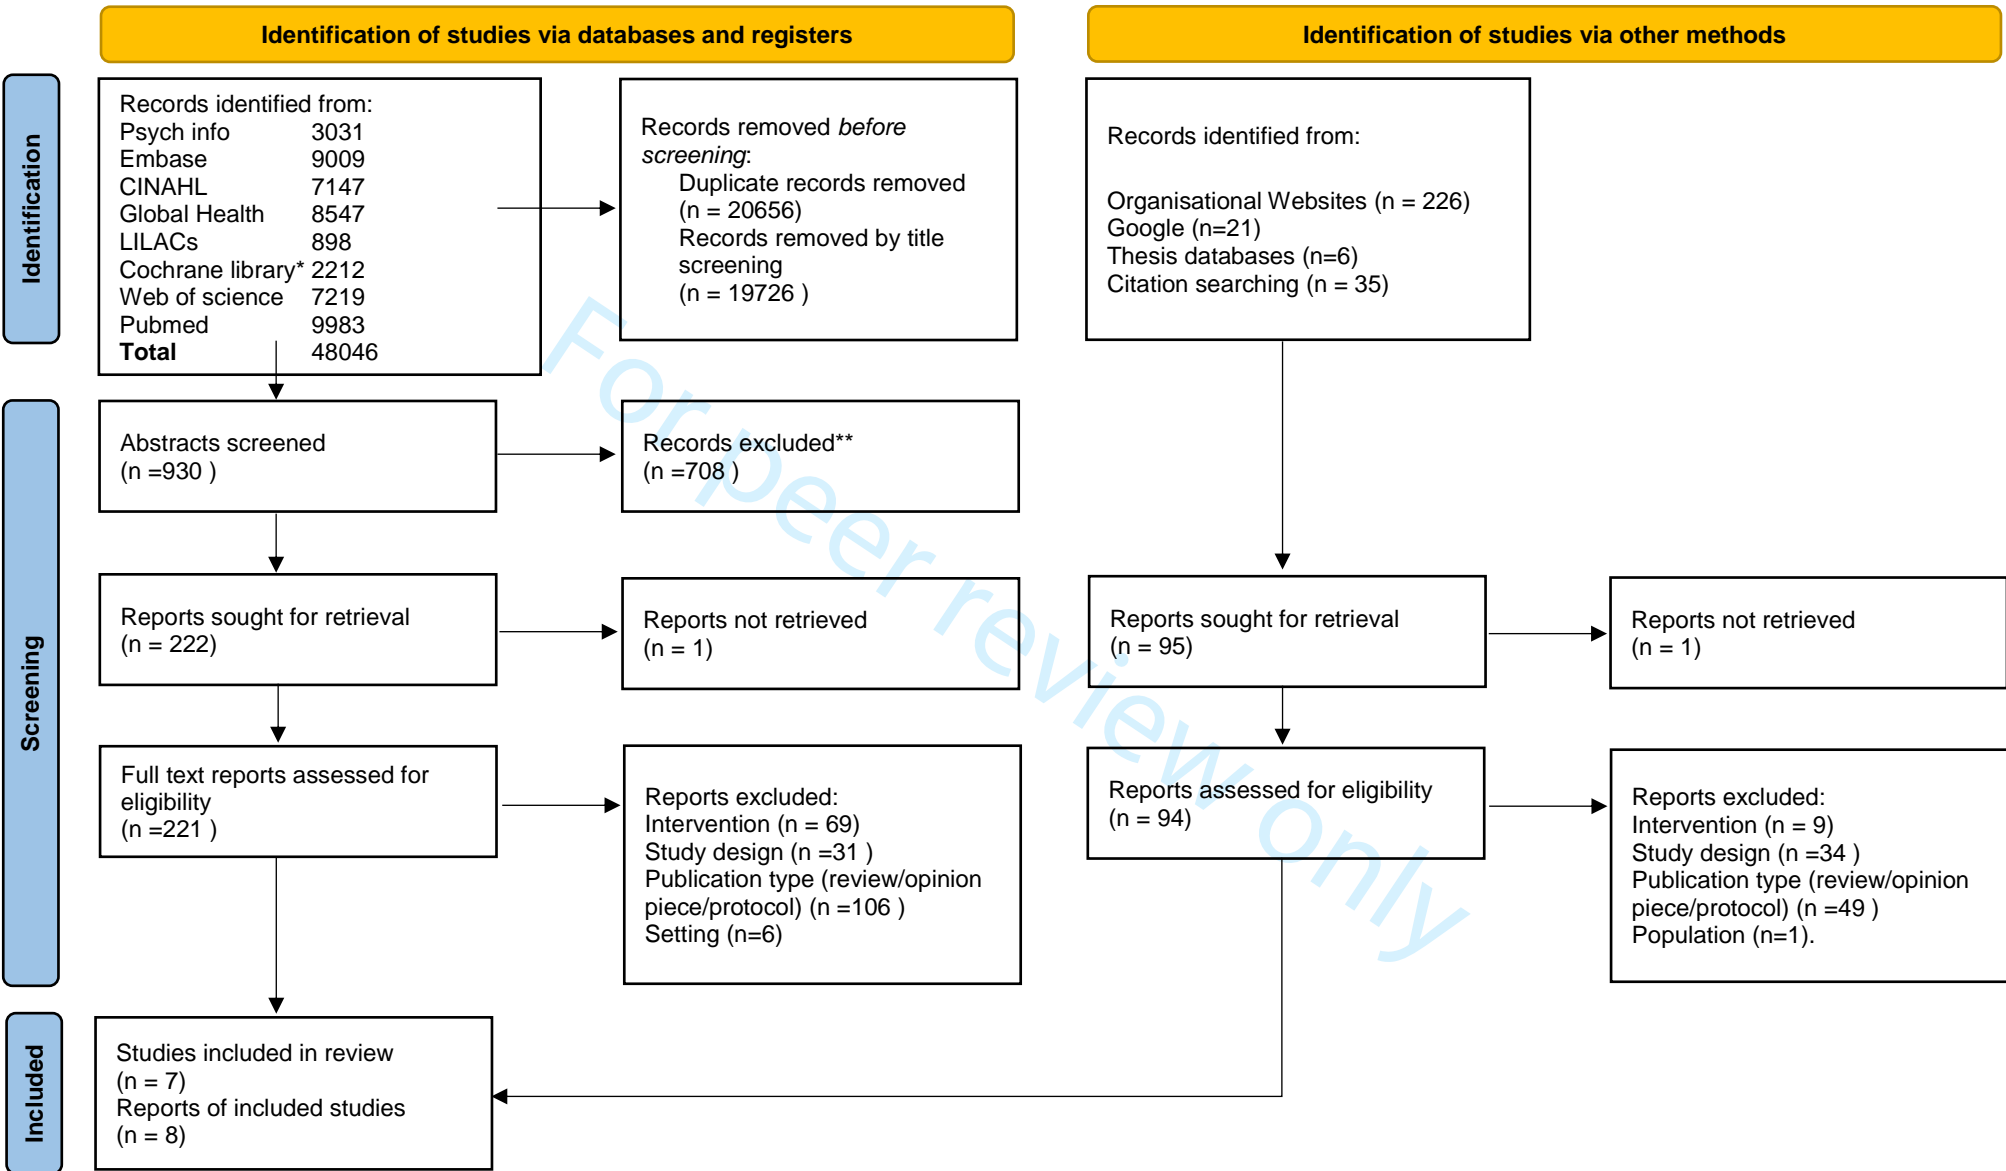

\* Including Central Registry of Clinical Trials, Clinical Trials.gov and WHO International Clinical Trials Registry Platform ICTRP. EU Clinical Trials registry search returned no results

1  
2  
3  
4  
5  
6  
7  
8  
9  
10  
11  
12  
13  
14  
15  
16  
17  
18  
19  
20  
21  
22  
23  
24  
25  
26  
27  
28  
29  
30  
31  
32  
33  
34  
35  
36  
37  
38  
39  
40  
41  
42  
43  
44  
45  
46  
47  
48  
49  
50  
51  
52  
53  
54  
55  
56  
57  
58  
59  
60

|                                                               |
|---------------------------------------------------------------|
| Random sequence generation                                    |
| Allocation concealment                                        |
| Baseline outcome measurements similar                         |
| Baseline characteristics similar                              |
| Incomplete outcome data                                       |
| Knowledge of the allocated interventions adequately prevented |
| Protection against contamination                              |
| Selective outcome reporting                                   |
| Other risks of bias                                           |

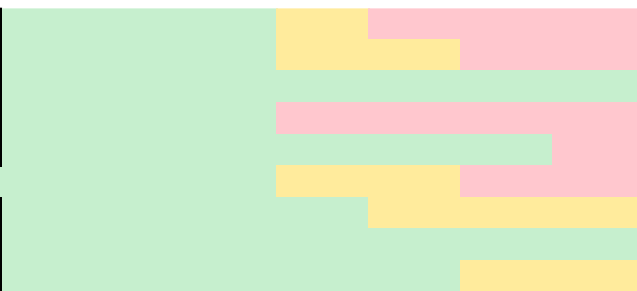

For peer review only



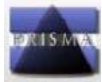

## PRISMA 2020 Checklist

| Section and Topic             | Item # | Checklist item                                                                                                                                                                                                                                                                                       | Location where item is reported |
|-------------------------------|--------|------------------------------------------------------------------------------------------------------------------------------------------------------------------------------------------------------------------------------------------------------------------------------------------------------|---------------------------------|
| <b>TITLE</b>                  |        |                                                                                                                                                                                                                                                                                                      |                                 |
| Title                         | 1      | Identify the report as a systematic review.                                                                                                                                                                                                                                                          | Page 1                          |
| <b>ABSTRACT</b>               |        |                                                                                                                                                                                                                                                                                                      |                                 |
| Abstract                      | 2      | See the PRISMA 2020 for Abstracts checklist.                                                                                                                                                                                                                                                         | Page 3                          |
| <b>INTRODUCTION</b>           |        |                                                                                                                                                                                                                                                                                                      |                                 |
| Rationale                     | 3      | Describe the rationale for the review in the context of existing knowledge.                                                                                                                                                                                                                          | Page 5                          |
| Objectives                    | 4      | Provide an explicit statement of the objective(s) or question(s) the review addresses.                                                                                                                                                                                                               | Page 6                          |
| <b>METHODS</b>                |        |                                                                                                                                                                                                                                                                                                      |                                 |
| Eligibility criteria          | 5      | Specify the inclusion and exclusion criteria for the review and how studies were grouped for the syntheses.                                                                                                                                                                                          | Page 6                          |
| Information sources           | 6      | Specify all databases, registers, websites, organisations, reference lists and other sources searched or consulted to identify studies. Specify the date when each source was last searched or consulted.                                                                                            | Page 9                          |
| Search strategy               | 7      | Present the full search strategies for all databases, registers and websites, including any filters and limits used.                                                                                                                                                                                 | Page 9                          |
| Selection process             | 8      | Specify the methods used to decide whether a study met the inclusion criteria of the review, including how many reviewers screened each record and each report retrieved, whether they worked independently, and if applicable, details of automation tools used in the process.                     | Page 10                         |
| Data collection process       | 9      | Specify the methods used to collect data from reports, including how many reviewers collected data from each report, whether they worked independently, any processes for obtaining or confirming data from study investigators, and if applicable, details of automation tools used in the process. | Page 10                         |
| Data items                    | 10a    | List and define all outcomes for which data were sought. Specify whether all results that were compatible with each outcome domain in each study were sought (e.g. for all measures, time points, analyses), and if not, the methods used to decide which results to collect.                        | Page 8                          |
|                               | 10b    | List and define all other variables for which data were sought (e.g. participant and intervention characteristics, funding sources). Describe any assumptions made about any missing or unclear information.                                                                                         | Page 10                         |
| Study risk of bias assessment | 11     | Specify the methods used to assess risk of bias in the included studies, including details of the tool(s) used, how many reviewers assessed each study and whether they worked independently, and if applicable, details of automation tools used in the process.                                    | Page 10                         |
| Effect measures               | 12     | Specify for each outcome the effect measure(s) (e.g. risk ratio, mean difference) used in the synthesis or presentation of results.                                                                                                                                                                  | Page 20                         |
| Synthesis methods             | 13a    | Describe the processes used to decide which studies were eligible for each synthesis (e.g. tabulating the study intervention characteristics and comparing against the planned groups for each synthesis (item #5)).                                                                                 | Page 10                         |
|                               | 13b    | Describe any methods required to prepare the data for presentation or synthesis, such as handling of missing summary statistics, or data conversions.                                                                                                                                                | N/A                             |
|                               | 13c    | Describe any methods used to tabulate or visually display results of individual studies and syntheses.                                                                                                                                                                                               | Page 10                         |
|                               | 13d    | Describe any methods used to synthesize results and provide a rationale for the choice(s). If meta-analysis was performed, describe the model(s), method(s) to identify the presence and extent of statistical heterogeneity, and software package(s) used.                                          | Page 10                         |
|                               | 13e    | Describe any methods used to explore possible causes of heterogeneity among study results (e.g. subgroup analysis, meta-regression).                                                                                                                                                                 | N/A                             |
|                               | 13f    | Describe any sensitivity analyses conducted to assess robustness of the synthesized results.                                                                                                                                                                                                         | N/A                             |
| Reporting bias                | 14     | Describe any methods used to assess risk of bias due to missing results in a synthesis (arising from reporting biases).                                                                                                                                                                              | Page 10                         |

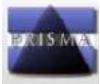

## PRISMA 2020 Checklist

| Section and Topic             | Item # | Checklist item                                                                                                                                                                                                                                                                       | Location where item is reported                          |
|-------------------------------|--------|--------------------------------------------------------------------------------------------------------------------------------------------------------------------------------------------------------------------------------------------------------------------------------------|----------------------------------------------------------|
| assessment                    |        |                                                                                                                                                                                                                                                                                      |                                                          |
| Certainty assessment          | 15     | Describe any methods used to assess certainty (or confidence) in the body of evidence for an outcome.                                                                                                                                                                                | Page 10                                                  |
| <b>RESULTS</b>                |        |                                                                                                                                                                                                                                                                                      |                                                          |
| Study selection               | 16a    | Describe the results of the search and selection process, from the number of records identified in the search to the number of studies included in the review, ideally using a flow diagram.                                                                                         | Page 11                                                  |
|                               | 16b    | Cite studies that might appear to meet the inclusion criteria, but which were excluded, and explain why they were excluded.                                                                                                                                                          | Page 25                                                  |
| Study characteristics         | 17     | Cite each included study and present its characteristics.                                                                                                                                                                                                                            | Page 15                                                  |
| Risk of bias in studies       | 18     | Present assessments of risk of bias for each included study.                                                                                                                                                                                                                         | Page 17 and extended data                                |
| Results of individual studies | 19     | For all outcomes, present, for each study: (a) summary statistics for each group (where appropriate) and (b) an effect estimate and its precision (e.g. confidence/credible interval), ideally using structured tables or plots.                                                     | Table 3, Page 20 and see extended data                   |
| Results of syntheses          | 20a    | For each synthesis, briefly summarise the characteristics and risk of bias among contributing studies.                                                                                                                                                                               | Page 18, Summary of findings table                       |
|                               | 20b    | Present results of all statistical syntheses conducted. If meta-analysis was done, present for each the summary estimate and its precision (e.g. confidence/credible interval) and measures of statistical heterogeneity. If comparing groups, describe the direction of the effect. | N/A                                                      |
|                               | 20c    | Present results of all investigations of possible causes of heterogeneity among study results.                                                                                                                                                                                       | N/A                                                      |
|                               | 20d    | Present results of all sensitivity analyses conducted to assess the robustness of the synthesized results.                                                                                                                                                                           | N/A                                                      |
| Reporting biases              | 21     | Present assessments of risk of bias due to missing results (arising from reporting biases) for each synthesis assessed.                                                                                                                                                              | Page 18                                                  |
| Certainty of evidence         | 22     | Present assessments of certainty (or confidence) in the body of evidence for each outcome assessed.                                                                                                                                                                                  | Page 18 and see extended data<br>GRADE assessment tables |
| <b>DISCUSSION</b>             |        |                                                                                                                                                                                                                                                                                      |                                                          |
| Discussion                    | 23a    | Provide a general interpretation of the results in the context of other evidence.                                                                                                                                                                                                    | Page 23                                                  |
|                               | 23b    | Discuss any limitations of the evidence included in the review.                                                                                                                                                                                                                      | Page 25                                                  |

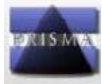

## PRISMA 2020 Checklist

| Section and Topic                              | Item # | Checklist item                                                                                                                                                                                                                             | Location where item is reported |
|------------------------------------------------|--------|--------------------------------------------------------------------------------------------------------------------------------------------------------------------------------------------------------------------------------------------|---------------------------------|
|                                                | 23c    | Discuss any limitations of the review processes used.                                                                                                                                                                                      | Page 25                         |
|                                                | 23d    | Discuss implications of the results for practice, policy, and future research.                                                                                                                                                             | Page 26                         |
| <b>OTHER INFORMATION</b>                       |        |                                                                                                                                                                                                                                            |                                 |
| Registration and protocol                      | 24a    | Provide registration information for the review, including register name and registration number, or state that the review was not registered.                                                                                             | Page 3                          |
|                                                | 24b    | Indicate where the review protocol can be accessed, or state that a protocol was not prepared.                                                                                                                                             | Page 25                         |
|                                                | 24c    | Describe and explain any amendments to information provided at registration or in the protocol.                                                                                                                                            | N/A                             |
| Support                                        | 25     | Describe sources of financial or non-financial support for the review, and the role of the funders or sponsors in the review.                                                                                                              |                                 |
| Competing interests                            | 26     | Declare any competing interests of review authors.                                                                                                                                                                                         |                                 |
| Availability of data, code and other materials | 27     | Report which of the following are publicly available and where they can be found: template data collection forms; data extracted from included studies; data used for all analyses; analytic code; any other materials used in the review. |                                 |

From: Page MJ, McKenzie JE, Bossuyt PM, Boutron I, Hoffmann TC, Mulrow CD, et al. The PRISMA 2020 statement: an updated guideline for reporting systematic reviews. *BMJ* 2021;372:n71. doi: 10.1136/bmj.n71

For more information, visit: <http://www.prisma-statement.org/>

1  
2  
3  
4  
5  
6  
7  
8  
9  
10  
11  
12  
13  
14  
15  
16  
17  
18  
19  
20  
21  
22  
23  
24  
25  
26  
27  
28  
29  
30  
31  
32  
33  
34  
35  
36  
37  
38  
39  
40  
41  
42  
43  
44  
45  
46  
47  
48  
49  
50  
51  
52  
53  
54  
55  
56  
57  
58  
59  
60

PubMed Search Strategy for “Effectiveness of link workers providing social prescribing on health outcomes and costs for adult patients in primary care and community settings. A protocol for a systematic review of the literature”

| Query                                                                                                                                                                                                                                                                                                                                                                                                                                                                           | Items found |
|---------------------------------------------------------------------------------------------------------------------------------------------------------------------------------------------------------------------------------------------------------------------------------------------------------------------------------------------------------------------------------------------------------------------------------------------------------------------------------|-------------|
| Search (((((((("wellbeing program*[Title/Abstract]) OR "community health advisor"[Title/Abstract]) OR "lay health worker*[Title/Abstract]) OR "community facilitator"[Title/Abstract]) OR community navigator) OR "patient navigator"[Title/Abstract]) OR "link-worker"[Title/Abstract]) OR ("linkworker" OR "link worker" OR "link-worker")) OR "social prescrib*") OR "community health worker"[Title/Abstract]) OR "community referral"[Title/Abstract] Sort by: [pubsolr12] | 6934        |
| Search "wellbeing program*[Title/Abstract] Sort by: [pubsolr12]                                                                                                                                                                                                                                                                                                                                                                                                                 | 25          |
| Search "community health advisor"[Title/Abstract] Sort by: [pubsolr12]                                                                                                                                                                                                                                                                                                                                                                                                          | 23          |
| Search "lay health worker*[Title/Abstract] Sort by: [pubsolr12]                                                                                                                                                                                                                                                                                                                                                                                                                 | 332         |
| Search "social referral"[Title/Abstract] Schema: all Sort by: [pubsolr12]                                                                                                                                                                                                                                                                                                                                                                                                       | 0           |
| Search ("non medical referral"[Title/Abstract] OR "non-medical referral"[Title/Abstract]) Sort by: [pubsolr12]                                                                                                                                                                                                                                                                                                                                                                  | 0           |
| Search "community facilitator"[Title/Abstract] Sort by: [pubsolr12]                                                                                                                                                                                                                                                                                                                                                                                                             | 7           |
| Search community navigator Sort by: [pubsolr12]                                                                                                                                                                                                                                                                                                                                                                                                                                 | 5275        |
| Search "community navigator"[Title/Abstract] Sort by: [pubsolr12]                                                                                                                                                                                                                                                                                                                                                                                                               | 0           |
| Search "patient navigator"[Title/Abstract] Sort by: [pubsolr12]                                                                                                                                                                                                                                                                                                                                                                                                                 | 247         |
| Search ("well-being coordinator"[Title/Abstract] OR "wellbeing coordinator"[Title/Abstract]) Sort by: [pubsolr12]                                                                                                                                                                                                                                                                                                                                                               | 0           |
| Search "link-worker"[Title/Abstract] Sort by: [pubsolr12]                                                                                                                                                                                                                                                                                                                                                                                                                       | 29          |
| Search "link worker"[Title/Abstract] Sort by: [pubsolr12]                                                                                                                                                                                                                                                                                                                                                                                                                       | 29          |
| Search ("linkworker" OR "link worker" OR "link-worker") Sort by: [pubsolr12]                                                                                                                                                                                                                                                                                                                                                                                                    | 39          |
| Search "social prescrib*" Sort by: [pubsolr12]                                                                                                                                                                                                                                                                                                                                                                                                                                  | 79          |
| Search "social prescrib*[Title/Abstract] Sort by: [pubsolr12]                                                                                                                                                                                                                                                                                                                                                                                                                   | 79          |
| Search "community health worker"[Title/Abstract] Sort by: [pubsolr12]                                                                                                                                                                                                                                                                                                                                                                                                           | 1052        |
| Search "focused care worker"[Title/Abstract] Sort by: [pubsolr12]                                                                                                                                                                                                                                                                                                                                                                                                               | 0           |
| Search "community referral"[Title/Abstract] Sort by: [pubsolr12]                                                                                                                                                                                                                                                                                                                                                                                                                | 89          |

Table 2 Public Patient Involvement reported according to Guidance for Reporting Involvement of Patients and the Public (GRIPP) 2 Short Form

**1: Aim**

The aim of the PPI was to provide the perspective of people living with multimorbidity on the implications of the results of a systematic review on the effectiveness of social prescribing link workers.

**2: Methods**

An advisory panel of six people living with multimorbidity was recruited via existing networks of students on a PhD program in multimorbidity. The panel meets quarterly to provide input on issues brought to them by the PhD students. The members are voluntary but receive a voucher to acknowledge their time and associated costs attending. The panel had been meeting for three years prior to providing input on this study. The meeting at which this study was discussed took place online, lasted two hours in total including a break and was facilitated by BK and 2 other PhD students on the multimorbidity PhD program. There was one hour dedicated to discuss the systematic review with them.

The group received a 500 word plain language summary of the findings of the systematic review one week in advance of the meeting. BK also summarised the methods and findings in a powerpoint presentation during the meeting. The group divided into small groups and discussed the implications for practice, policy and future research and fed back to a plenary discussion afterwards.

**3: Study results**

The group were surprised about the limited evidence and wondered if the outcomes had been appropriate or asked in the right way. They agreed that quality of life was a good overall outcome and felt hospitalisations would matter from the taxpayer perspective. Determining a set of outcomes was felt to be beyond the time available and we agreed it would involve a separate piece of research work. As individuals they did not feel that social prescribing needed to be presented as an experimental intervention, as many interventions or medications may not work for an individual and they felt their healthcare provider would recommend what they thought might work for them, but acknowledged this wasn't guaranteed in the case of social prescribing. They felt policy makers should roll social prescribing out on a pilot basis over a number of years and evaluate it along the way. In terms of targeting specific groups the PPI group felt that social prescribing should be available to whoever might need it, but that it would have to be flexible to allow longer support for those with more complex needs.

Table 2 Public Patient Involvement reported according to Guidance for Reporting Involvement of Patients and the Public (GRIPP) 2 Short Form

#### 4: Discussion and conclusions

The group clearly came to the meeting with a positive perception of social prescribing and felt it was a great idea that should be tested. Despite this possible lack of objectivity, the group broadly agreed with the conclusions that the research team had made. Their input highlighted the need for a set of core outcomes for social prescribing with input from potential beneficiaries. They took a more flexible approach on recommendations around specific target groups and intervention intensity, preferring an individually tailored intervention rather than limit access to those with the highest need.

#### 5: Reflections/critical perspective

While the lack of cost effectiveness evidence was highlighted the idea of opportunity cost was not discussed. Presenting an intervention with no cost evidence base against one with cost evidence base however would be an impossible comparison. It is hard in a group format to check understanding of what has been presented, but given that conclusions were aligned with those of the research team it is reasonable to assume the group understood what was presented and asked of them.

review only

1  
2  
3  
4  
5  
6  
7  
8  
9  
10  
11  
12  
13  
14  
15  
16  
17  
18  
19  
20  
21  
22  
23  
24  
25  
26  
27  
28  
29  
30  
31  
32  
33  
34  
35  
36  
37  
38  
39  
40  
41  
42  
43  
44  
45  
46

| HRQOL Allocation concealment                                                                                                                                                                                                                                                 | Baseline outcome measurements similar                                                                                                                                                                                                                                  | Baseline characteristics similar                                                                          | Incomplete outcome data                                                                                                                                                                                      | Knowledge of the allocated interventions adequately prevented during the study                                                                                                                                                                                                                | Protection against contamination                                                                                                              | Selective outcome reporting                                                                                                                                               | Other risks of bias | Overall Judgement per study                               | Overall judgement for outcome                             |
|------------------------------------------------------------------------------------------------------------------------------------------------------------------------------------------------------------------------------------------------------------------------------|------------------------------------------------------------------------------------------------------------------------------------------------------------------------------------------------------------------------------------------------------------------------|-----------------------------------------------------------------------------------------------------------|--------------------------------------------------------------------------------------------------------------------------------------------------------------------------------------------------------------|-----------------------------------------------------------------------------------------------------------------------------------------------------------------------------------------------------------------------------------------------------------------------------------------------|-----------------------------------------------------------------------------------------------------------------------------------------------|---------------------------------------------------------------------------------------------------------------------------------------------------------------------------|---------------------|-----------------------------------------------------------|-----------------------------------------------------------|
| Score “Low risk” if the unit of allocation was by institution, team or professional and allocation was performed on all units at the start of the study; or if the unit of allocation was by patient or episode of care and there was some form of centralised randomisation | Score “Low risk” if performance or patient outcomes were measured prior to the intervention, and no important differences were present across study groups. In randomised trials, score “Low risk” if imbalanced but appropriate adjusted analysis was performed (e.g. | Score “Low risk” if baseline characteristics of the study and control providers are reported and similar. | Score “Low risk” if missing outcome measures were unlikely to bias the results (e.g. the proportion of missing data was similar in the intervention and control groups or the proportion of missing data was | Score “Low risk” if the authors state explicitly that the primary outcome variables were assessed blindly, or the outcomes are objective, e.g. length of hospital stay. Primary outcomes are those variables that correspond to the primary hypothesis or question as defined by the authors. | Score “Low risk” if allocation was by community, institution or practice and it is unlikely that the control group received the intervention. | Score “Low risk” if there is no evidence that outcomes were selectively reported (e.g. all relevant outcomes in the methods section are reported in the results section). |                     | See Table 8.7.a of EPOC summary risk of bias for guidance | See Table 8.7.a of EPOC summary risk of bias for guidance |

1  
2  
3  
4  
5  
6  
7  
8  
9  
10  
11  
12  
13  
14  
15  
16  
17  
18  
19  
20  
21  
22  
23  
24  
25  
26  
27  
28  
29  
30  
31  
32  
33  
34  
35  
36  
37  
38  
39  
40  
41  
42  
43  
44  
45  
46

|                                                                                                                     |                                                                                                                                  |                                                                                                                                                                                                                                                                                                                           |                                                                                                                 |                                                                             |  |                                                                                                                                                                                                         |                                                                                                                                         |
|---------------------------------------------------------------------------------------------------------------------|----------------------------------------------------------------------------------------------------------------------------------|---------------------------------------------------------------------------------------------------------------------------------------------------------------------------------------------------------------------------------------------------------------------------------------------------------------------------|-----------------------------------------------------------------------------------------------------------------|-----------------------------------------------------------------------------|--|---------------------------------------------------------------------------------------------------------------------------------------------------------------------------------------------------------|-----------------------------------------------------------------------------------------------------------------------------------------|
| <p>ion<br/>scheme, an<br/>on-site<br/>computer<br/>system or<br/>sealed<br/>opaque<br/>envelopes<br/>were used.</p> | <p>Analysis of<br/>covariance).</p>                                                                                              |                                                                                                                                                                                                                                                                                                                           | <p>less than<br/>the effect<br/>size i.e.<br/>unlikely<br/>to<br/>overturn<br/>the study<br/>result)</p>        |                                                                             |  |                                                                                                                                                                                                         |                                                                                                                                         |
| <p>Controlled<br/>before-<br/>after<br/>studies<br/>should be<br/>scored<br/>"High risk"</p>                        | <p>Score "High<br/>risk" if<br/>important<br/>differences<br/>were<br/>present and<br/>not<br/>adjusted for<br/>in analysis.</p> | <p>Score "High<br/>risk" if<br/>there is no<br/>report of<br/>characterist<br/>ics in text<br/>or tables or<br/>if there are<br/>differences<br/>between<br/>control and<br/>interventio<br/>n providers.<br/>Note that<br/>in some<br/>cases<br/>imbalance<br/>in patient<br/>characterist<br/>ics may be<br/>due to</p> | <p>Score<br/>"High<br/>risk" if<br/>missing<br/>outcome<br/>data was<br/>likely to<br/>bias the<br/>results</p> | <p>Score "High risk" if the<br/>outcomes were not assessed<br/>blindly.</p> |  | <p>Score "High<br/>risk" if it is<br/>likely that<br/>the control<br/>group<br/>received the<br/>intervention<br/>(e.g. if<br/>patients<br/>rather than<br/>professionals<br/>were<br/>randomised).</p> | <p>Score<br/>"High risk"<br/>if some<br/>important<br/>outcomes<br/>are<br/>subsequen<br/>tly<br/>omitted<br/>from the<br/>results.</p> |



1  
2  
3  
4  
5  
6  
7  
8  
9  
10  
11  
12  
13  
14  
15  
16  
17  
18  
19  
20  
21  
22  
23  
24  
25  
26  
27  
28  
29  
30  
31  
32  
33  
34  
35  
36  
37  
38  
39  
40  
41  
42  
43  
44  
45  
46

recruitment  
bias  
whereby  
the  
provider  
was  
responsible  
for  
recruiting  
patients  
into the  
trial.

|                                                                 |                                                                                                         |                                                                                                                                                                    |                                                                                                                                                   |                                                       |                                                                                                                                                                                                                                                                                          |                                                                                                                                                                                                                                           |
|-----------------------------------------------------------------|---------------------------------------------------------------------------------------------------------|--------------------------------------------------------------------------------------------------------------------------------------------------------------------|---------------------------------------------------------------------------------------------------------------------------------------------------|-------------------------------------------------------|------------------------------------------------------------------------------------------------------------------------------------------------------------------------------------------------------------------------------------------------------------------------------------------|-------------------------------------------------------------------------------------------------------------------------------------------------------------------------------------------------------------------------------------------|
|                                                                 |                                                                                                         |                                                                                                                                                                    |                                                                                                                                                   |                                                       | Score<br>"Unclear<br>risk" if<br>professionals<br>were<br>allocated<br>within a clinic<br>or practice<br>and it is<br>possible that<br>communicati<br>on between<br>intervention<br>and control<br>professionals<br>could have<br>occurred<br>(e.g.<br>physicians<br>within<br>practices | Score<br>"Unclear<br>risk" if not<br>specified<br>in the<br>paper. For<br>further<br>informatio<br>n see<br>Chapter<br>13 of the<br>Cochrane<br>handbook:<br>Assessing<br>risk of bias<br>due to<br>missing<br>results in a<br>synthesis. |
| Score<br>"Unclear<br>risk" if not<br>specified in<br>the paper. | If<br>randomised<br>trials have<br>no baseline<br>measure of<br>outcome,<br>score<br>"Unclear<br>risk". | Score<br>"Unclear<br>risk" if it is<br>not clear in<br>the paper<br>(e.g.<br>characterist<br>ics are<br>mentioned<br>in text but<br>no data<br>were<br>presented). | Score<br>"Unclear<br>risk" if<br>not<br>specified<br>in the<br>paper (Do<br>not<br>assume<br>100%<br>follow up<br>unless<br>stated<br>explicitly) | Score "Unclear risk" if not<br>specified in the paper |                                                                                                                                                                                                                                                                                          |                                                                                                                                                                                                                                           |

1  
2  
3  
4  
5  
6  
7  
8  
9  
10  
11  
12  
13  
14  
15  
16  
17  
18  
19  
20  
21  
22  
23  
24  
25  
26  
27  
28  
29  
30  
31  
32  
33  
34  
35  
36  
37  
38  
39  
40  
41  
42  
43  
44  
45  
46

|                                                   |                                                         |                                                                                                   |                                                                                                               |                                                                                                                                        |                                                                                                                                                                                                          |                                            |                                                                                                                                            |                                                                                                                                                                                                      |
|---------------------------------------------------|---------------------------------------------------------|---------------------------------------------------------------------------------------------------|---------------------------------------------------------------------------------------------------------------|----------------------------------------------------------------------------------------------------------------------------------------|----------------------------------------------------------------------------------------------------------------------------------------------------------------------------------------------------------|--------------------------------------------|--------------------------------------------------------------------------------------------------------------------------------------------|------------------------------------------------------------------------------------------------------------------------------------------------------------------------------------------------------|
|                                                   |                                                         |                                                                                                   |                                                                                                               |                                                                                                                                        |                                                                                                                                                                                                          |                                            | <p>were allocated to intervention or control)</p>                                                                                          |                                                                                                                                                                                                      |
| <p>Low risk: centralised randomisation scheme</p> | <p>Low risk: Baseline outcome measures were similar</p> | <p>Low risk: there were slightly more participants of hispanic ethnicity in one arm-0 vs 3.7%</p> | <p>Low risk: 79% ad 81% f/up in int and control and multiple imputation technique s used for missing data</p> | <p>Unclear risk: not possible to blind to intervention and outcome was patient reported, although RAs collecting data were blinded</p> | <p>Unclear risk: randomisation was at the patient level, however unlikely controls received the intervention, but not explicitly stated whether intervention was available outside the trial setting</p> | <p>Low risk: all outcomes are reported</p> | <p>Unclear: The authors offer commercial consulting services on setting up similar CHW interventions since 2018 after this publication</p> | <p>Low risk: low risk of bias in 6/9 areas, and other areas unlikely to have significant impact on ROB. While the paper is at risk of overpresenting positive findings all outcomes are reported</p> |

1  
2  
3  
4  
5  
6  
7  
8  
9  
10  
11  
12  
13  
14  
15  
16  
17  
18  
19  
20  
21  
22  
23  
24  
25  
26  
27  
28  
29  
30  
31  
32  
33  
34  
35  
36  
37  
38  
39  
40  
41  
42  
43  
44  
45  
46

|                                            |                                                  |                                                                        |                                                          |                                                                                                                                 |                                                                                                                                                                |                                     |                                                                                                   |                                                                                                                                                                                                                         |                                          |
|--------------------------------------------|--------------------------------------------------|------------------------------------------------------------------------|----------------------------------------------------------|---------------------------------------------------------------------------------------------------------------------------------|----------------------------------------------------------------------------------------------------------------------------------------------------------------|-------------------------------------|---------------------------------------------------------------------------------------------------|-------------------------------------------------------------------------------------------------------------------------------------------------------------------------------------------------------------------------|------------------------------------------|
|                                            |                                                  |                                                                        |                                                          |                                                                                                                                 |                                                                                                                                                                |                                     |                                                                                                   | along with statistical significance.                                                                                                                                                                                    |                                          |
| Low risk: centralised randomisation scheme | Low risk: Baseline outcome measures were similar | Low risk: Intervention group were more likely to be employed 20% vs 8% | Low risk: 88% and 87% complete data, multiple imputation | Unclear risk: not possible to blind to intervention and outcome was patient reported, although RAs collecting data were blinded | Unclear risk: randomisation was at the patient level, however unlikely they received controls received the intervention, so not a major factor for overall ROB | Low risk: all outcomes are reported | Unclear- The authors offer commercial consulting services on setting up similar CHW interventions | Low risk: low risk of bias in 6/9 areas, and other areas unlikely to have significant impact on ROB. While the paper is at risk of overly presenting positive findings all outcomes are reported along with statistical | Summary Judgement RCTs: Low risk of bias |

|                                                                                                                 |                                                                                                                                            |                                                                                                 |                                                                                                                               |                                                                                   |                                                                          |                                      |                                                                                            |                                                      |
|-----------------------------------------------------------------------------------------------------------------|--------------------------------------------------------------------------------------------------------------------------------------------|-------------------------------------------------------------------------------------------------|-------------------------------------------------------------------------------------------------------------------------------|-----------------------------------------------------------------------------------|--------------------------------------------------------------------------|--------------------------------------|--------------------------------------------------------------------------------------------|------------------------------------------------------|
|                                                                                                                 |                                                                                                                                            |                                                                                                 |                                                                                                                               |                                                                                   |                                                                          |                                      |                                                                                            | significance.                                        |
| High risk: CBA and evidence of selection bias with those from more deprived backgrounds not being offered entry | Low risk: significant differences in baseline scores, although linear regression model used which would have corrected for baseline scores | High risk: differences in baseline characteristics although these were adjusted for in analysis | Low risk: low rates of missing data, 84% follow up intervention and 93% control and did separate paired and unpaired analysis | Unclear risk- unclear how follow up assessments were done, by whom and if blinded | Low risk: the service was not available in areas where the control lived | Low risk: all outcomes were reported | Low risk: No other risks identified. Funded by NHS Devon, no competing interests declared. | High risk: high risk or unclear risk in 4 of 9 areas |
| High risk: CBA and evidence of selection bias with those from more deprived backgrounds not being offered entry | Low risk: significant differences in baseline scores, although linear regression model used which would have corrected for baseline scores | High risk: differences in baseline characteristics although these were adjusted for in analysis | Low risk: low rates of missing data, 84% follow up intervention and 96% control                                               | Unclear risk- unclear how follow up assessments were done, by whom and if blinded | Low risk: the service was not available in areas where the control lived | Low risk: all outcomes were reported | Low risk: No other risks identified. Funded by NHS Devon, no competing interests declared. | High risk: high risk or unclear risk in 4 of 9 areas |

1  
2  
3  
4  
5  
6  
7  
8  
9  
10  
11  
12  
13  
14  
15  
16  
17  
18  
19  
20  
21  
22  
23  
24  
25  
26  
27  
28  
29  
30  
31  
32  
33  
34  
35  
36  
37  
38  
39  
40  
41  
42  
43  
44  
45  
46

|                                                              |                                                                                     |                                                                                                 |                                                        |                                                                                          |                                                                          |                                      |                                                                                               |                                              |                                                                                                                     |
|--------------------------------------------------------------|-------------------------------------------------------------------------------------|-------------------------------------------------------------------------------------------------|--------------------------------------------------------|------------------------------------------------------------------------------------------|--------------------------------------------------------------------------|--------------------------------------|-----------------------------------------------------------------------------------------------|----------------------------------------------|---------------------------------------------------------------------------------------------------------------------|
| offered entry                                                | would have corrected for baseline scores                                            |                                                                                                 |                                                        |                                                                                          |                                                                          |                                      |                                                                                               |                                              |                                                                                                                     |
| Unclear risk: practices randomly assigned but how not stated | Low risk: significant differences in baseline- explicitly corrected for in analysis | High risk: differences in baseline characteristics although these were adjusted for in analysis | Low risk: 76% follow up int, 92% control, ITT analysis | High risk: due to the nature of the intervention not possible to assess outcomes blindly | Low risk: the service was not available in areas where the control lived | Low risk: all outcomes were reported | Low risk: No other risks identified. Funded by NHS Scotland, no competing interests declared. | Unclear or High risk of bias in 4 of 9 areas | Summary Judgement NRCTS: High risk of Bias due to non randomised design and challenge of finding suitable controls. |

Mental Health

| Allocation concealment | Baseline outcome measurements similar | Baseline characteristics similar | Incomplete outcome data | Knowledge of the allocated interventions adequately prevented during the study | Protection against contamination | Selective outcome reporting | Other risks of bias | Overall Judgement per study | Overall judgement for outcome |
|------------------------|---------------------------------------|----------------------------------|-------------------------|--------------------------------------------------------------------------------|----------------------------------|-----------------------------|---------------------|-----------------------------|-------------------------------|
|------------------------|---------------------------------------|----------------------------------|-------------------------|--------------------------------------------------------------------------------|----------------------------------|-----------------------------|---------------------|-----------------------------|-------------------------------|

|    |              |               |              |             |                |                         |           |           |
|----|--------------|---------------|--------------|-------------|----------------|-------------------------|-----------|-----------|
| 1  | Score “Low   |               |              |             |                |                         |           |           |
| 2  | risk” if the |               |              |             |                |                         |           |           |
| 3  | unit of      |               |              |             |                |                         |           |           |
| 4  | allocation   | Score “Low    |              | Score “Low  |                |                         |           |           |
| 5  | was by       | risk” if      |              | risk” if    |                |                         |           |           |
| 6  | institution, | performanc    |              | missing     |                |                         |           |           |
| 7  | team or      | e or patient  |              | outcome     |                |                         |           |           |
| 8  | professiona  | outcomes      |              | measures    |                |                         |           |           |
| 9  | l and        | were          |              | were        |                |                         |           |           |
| 10 | allocation   | measured      |              | unlikely to |                |                         |           |           |
| 11 | was          | prior to the  |              | bias the    |                |                         |           |           |
| 12 | performed    | interventio   |              | results     |                |                         |           |           |
| 13 | on all units | n, and no     |              | (e.g. the   |                |                         |           |           |
| 14 | at the start | important     |              | proportion  |                |                         |           |           |
| 15 | of the       | differences   |              | of missing  |                |                         |           |           |
| 16 | study; or if | were          |              | data was    |                |                         |           |           |
| 17 | the unit of  | present       |              | similar in  |                |                         |           |           |
| 18 | allocation   | across        |              | the         |                |                         |           |           |
| 19 | was by       | study         |              | interventio |                |                         |           |           |
| 20 | patient or   | groups. In    |              | n and       |                |                         |           |           |
| 21 | episode of   | randomised    |              | control     |                |                         |           |           |
| 22 | care and     | trials, score |              | groups or   | Score “Low     | Score “Low              |           |           |
| 23 | there was    | “Low risk” if | Score “Low   | the         | risk” if the   | risk” if                |           |           |
| 24 | some form    | imbalanced    | risk” if     | proportion  | allocation     | was by                  |           |           |
| 25 | of           | but           | baseline     | of missing  | community,     | Score “Low risk” if     |           |           |
| 26 | centralised  | appropriate   | characteris  | data was    | institution or | there is no evidence    |           |           |
| 27 | randomisat   | adjusted      | tics of the  | less than   | practice and   | that outcomes were      | See Table | See Table |
| 28 | ion          | analysis      | study and    | the effect  | it is unlikely | selectively reported    | 8.7.a of  | 8.7.a of  |
| 29 | scheme, an   | was           | control      | size i.e.   | that the       | (e.g. all relevant      | EPOC      | EPOC      |
| 30 | on-site      | performed     | providers    | unlikely to | control        | outcomes in the         | summary   | summary   |
| 31 | computer     | (e.g.         | are          | overturn    | group          | methods section are     | risk of   | risk of   |
| 32 | system or    | Analysis of   | reported     | the study   | received the   | reported in the results | bias for  | bias for  |
| 33 | sealed       | covariance).  | and similar. | result)     | intervention.  | section).               | guidance  | guidance  |
| 34 |              |               |              |             |                |                         |           |           |
| 35 |              |               |              |             |                |                         |           |           |
| 36 |              |               |              |             |                |                         |           |           |
| 37 |              |               |              |             |                |                         |           |           |
| 38 |              |               |              |             |                |                         |           |           |
| 39 |              |               |              |             |                |                         |           |           |
| 40 |              |               |              |             |                |                         |           |           |
| 41 |              |               |              |             |                |                         |           |           |
| 42 |              |               |              |             |                |                         |           |           |
| 43 |              |               |              |             |                |                         |           |           |
| 44 |              |               |              |             |                |                         |           |           |
| 45 |              |               |              |             |                |                         |           |           |
| 46 |              |               |              |             |                |                         |           |           |

1  
2  
3  
4  
5  
6  
7  
8  
9  
10  
11  
12  
13  
14  
15  
16  
17  
18  
19  
20  
21  
22  
23  
24  
25  
26  
27  
28  
29  
30  
31  
32  
33  
34  
35  
36  
37  
38  
39  
40  
41  
42  
43  
44  
45  
46

opaque envelopes were used.

Score "High risk" if there is no report of characteristics in text or tables or if there are differences between control and intervention providers.

Note that "High risk" if missing outcome data was likely to bias the results

Score "High risk" if the outcomes were not assessed blindly.

Score "High risk" if it is likely that the control group received the intervention (e.g. if patients rather than professionals were randomised).

Score "High risk" if some important outcomes are subsequently omitted from the results.

Controlled before-after studies should be scored "High risk"

Score "High risk" if important differences were present and not adjusted for in analysis.

Note that in some cases imbalance in patient characteristics may be

For peer review only

1  
2  
3  
4  
5  
6  
7  
8  
9  
10  
11  
12  
13  
14  
15  
16  
17  
18  
19  
20  
21  
22  
23  
24  
25  
26  
27  
28  
29  
30  
31  
32  
33  
34  
35  
36  
37  
38  
39  
40  
41  
42  
43  
44  
45  
46

due to  
recruitment  
bias  
whereby  
the  
provider  
was  
responsible  
for  
recruiting  
patients  
into the  
trial.

|                                                                 |                                                                                                         |                                                                                                                                                                |                                                                                                                                              |                                                          |                                                                                                                                                                                                                                                                  |                                                                                                                                                                                                                                          |
|-----------------------------------------------------------------|---------------------------------------------------------------------------------------------------------|----------------------------------------------------------------------------------------------------------------------------------------------------------------|----------------------------------------------------------------------------------------------------------------------------------------------|----------------------------------------------------------|------------------------------------------------------------------------------------------------------------------------------------------------------------------------------------------------------------------------------------------------------------------|------------------------------------------------------------------------------------------------------------------------------------------------------------------------------------------------------------------------------------------|
|                                                                 |                                                                                                         |                                                                                                                                                                |                                                                                                                                              |                                                          | Score<br>"Unclear<br>risk" if<br>professionals<br>were<br>allocated<br>within a<br>clinic or<br>practice and<br>it is possible<br>that<br>communication between<br>intervention<br>and control<br>professionals<br>could have<br>occurred<br>(e.g.<br>physicians | Score<br>"Unclear<br>risk" if not<br>specified<br>in the<br>paper. For<br>further<br>information see<br>Chapter<br>13 of the<br>Cochrane<br>handbook:<br>Assessing<br>risk of bias<br>due to<br>missing<br>results in<br>a<br>synthesis. |
| Score<br>"Unclear<br>risk" if not<br>specified in<br>the paper. | If<br>randomised<br>trials have<br>no baseline<br>measure of<br>outcome,<br>score<br>"Unclear<br>risk". | Score<br>"Unclear<br>risk" if it is<br>not clear in<br>the paper<br>(e.g.<br>characteristics are<br>mentioned<br>in text but<br>no data<br>were<br>presented). | Score<br>"Unclear<br>risk" if not<br>specified in<br>the paper<br>(Do not<br>assume<br>100%<br>follow up<br>unless<br>stated<br>explicitly). | Score<br>"Unclear risk" if not<br>specified in the paper |                                                                                                                                                                                                                                                                  |                                                                                                                                                                                                                                          |



1  
2  
3  
4  
5  
6  
7  
8  
9  
10  
11  
12  
13  
14  
15  
16  
17  
18  
19  
20  
21  
22  
23  
24  
25  
26  
27  
28  
29  
30  
31  
32  
33  
34  
35  
36  
37  
38  
39  
40  
41  
42  
43  
44  
45  
46

|                                                                                                                        |                                                                                      |                                                                                                                                                          |                                                                                                                                                   |                                                                                                               |                                                                                                                                                                                                                                 |                                                                                                        |                                                                                                            |                                          |
|------------------------------------------------------------------------------------------------------------------------|--------------------------------------------------------------------------------------|----------------------------------------------------------------------------------------------------------------------------------------------------------|---------------------------------------------------------------------------------------------------------------------------------------------------|---------------------------------------------------------------------------------------------------------------|---------------------------------------------------------------------------------------------------------------------------------------------------------------------------------------------------------------------------------|--------------------------------------------------------------------------------------------------------|------------------------------------------------------------------------------------------------------------|------------------------------------------|
|                                                                                                                        |                                                                                      |                                                                                                                                                          |                                                                                                                                                   | within practices were allocated to intervention or control)                                                   |                                                                                                                                                                                                                                 |                                                                                                        |                                                                                                            |                                          |
| Low risk: sealed opaque envelopes, while there was an early error- this was identified and those participants excluded | Low risk: no important differences and baseline scores were adjusted for in analysis | low risk: control were slightly more likely to be male and younger but otherwise comparable, this had no impact on results when adjusted for in analysis | Low risk: similar amounts of missing data in both arms, at 67%, however this reduced power to detect a difference as required sample size was 161 | High risk: due to the nature of the intervention not possible to blind participants and self reported outcome | Unclear risk: randomisation was at the patient level within practices, unclear if the intervention was available outside the trial- suggestion it was already running, so people may have received it before entering the trial | Low risk: No other risks identified. Funded by Avon health authority, no competing interests declared. | Low risk: in 7 of 9 areas, blinding very challenging given nature of intervention and were validated PROMs | Summary Judgement RCTs: low risk of bias |

|                                                                                                                        |                                                                                                                                                   |                                                                                                                                                                                         |                                                                                                                                          |                                                                                                                                   |                                                                                 |                                             |                                                                                                                         |                                                             |
|------------------------------------------------------------------------------------------------------------------------|---------------------------------------------------------------------------------------------------------------------------------------------------|-----------------------------------------------------------------------------------------------------------------------------------------------------------------------------------------|------------------------------------------------------------------------------------------------------------------------------------------|-----------------------------------------------------------------------------------------------------------------------------------|---------------------------------------------------------------------------------|---------------------------------------------|-------------------------------------------------------------------------------------------------------------------------|-------------------------------------------------------------|
| <p>High risk: CBA</p>                                                                                                  | <p>Low risk: significant differences in baseline scores, although linear regression model used which would have corrected for baseline scores</p> | <p>High risk: significant differences in living arrangements, education, work status, adjustments for same did not significantly alter results, suggesting other unknown imbalances</p> | <p>High risk: control follow up 43%, interventions for same did not significantly alter results, suggesting other unknown imbalances</p> | <p>High risk: due to the nature of the intervention not possible to assess outcomes blindly and patients self reported</p>        | <p>Low risk: the service was not available in areas where the control lived</p> | <p>Low risk: all outcomes were reported</p> | <p>Low risk: No other risks identified. Funded by DoH, independent research group, no competing interests declared.</p> | <p>High risk: high risk in 5 of 9 areas</p>                 |
| <p>High risk: CBA and evidence of selection bias with those from more deprived backgrounds not being offered entry</p> | <p>Low risk: significant differences in baseline scores, although linear regression model used which would have corrected for baseline scores</p> | <p>High risk: differences in baseline characteristics although these were adjusted for in analysis</p>                                                                                  | <p>Low risk: low rates of missing data, 84% follow up intervention and 96% control</p>                                                   | <p>Unclear risk: due to the nature of the intervention not possible to blind participants and unclear how follow up collected</p> | <p>Low risk: the service was not available in areas where the control lived</p> | <p>Low risk: all outcomes were reported</p> | <p>Low risk: No other risks identified. Funded by NHS Hackney CCG, no competing interests declared.</p>                 | <p>High risk: high risk or unclear risk in 4 of 9 areas</p> |

1  
2  
3  
4  
5  
6  
7  
8  
9  
10  
11  
12  
13  
14  
15  
16  
17  
18  
19  
20  
21  
22  
23  
24  
25  
26  
27  
28  
29  
30  
31  
32  
33  
34  
35  
36  
37  
38  
39  
40  
41  
42  
43  
44  
45  
46

|                                                              |                                                                                     |                                                                                                 |                                          |                                                                                                                                                 |                                                                          |                                      |                                                                                               |                                              |                                                                                                                                                      |
|--------------------------------------------------------------|-------------------------------------------------------------------------------------|-------------------------------------------------------------------------------------------------|------------------------------------------|-------------------------------------------------------------------------------------------------------------------------------------------------|--------------------------------------------------------------------------|--------------------------------------|-----------------------------------------------------------------------------------------------|----------------------------------------------|------------------------------------------------------------------------------------------------------------------------------------------------------|
| Unclear risk: practices randomly assigned but how not stated | Low risk: significant differences in baseline- explicitly corrected for in analysis | High risk: differences in baseline characteristics although these were adjusted for in analysis | Low risk: 76% follow up int, 92% control | High risk: due to the nature of the intervention not possible to assess outcomes blindly and patients self reported, statisticians were blinded | Low risk: the service was not available in areas where the control lived | Low risk: all outcomes were reported | Low risk: No other risks identified. Funded by NHS Scotland, no competing interests declared. | High or unclear risk of bias in 4 of 9 areas | Summary Judgement nRCTS: high risk of bias due to difficulty in concealing allocation, baseline differences in control groups, non randomised design |
|--------------------------------------------------------------|-------------------------------------------------------------------------------------|-------------------------------------------------------------------------------------------------|------------------------------------------|-------------------------------------------------------------------------------------------------------------------------------------------------|--------------------------------------------------------------------------|--------------------------------------|-----------------------------------------------------------------------------------------------|----------------------------------------------|------------------------------------------------------------------------------------------------------------------------------------------------------|

Social Contacts

Peer review only

1  
2  
3  
4  
5  
6  
7  
8  
9  
10  
11  
12  
13  
14  
15  
16  
17  
18  
19  
20  
21  
22  
23  
24  
25  
26  
27  
28  
29  
30  
31  
32  
33  
34  
35  
36  
37  
38  
39  
40  
41  
42  
43  
44  
45  
46

|                                                                                                                                          |                                                                                                                                                                                                                                                                                                                                         |                                                                                                                                                                                                                                                                                      |                                                                                                                  |                                                                                                 |                                                                                                                                                                                                                                                                                                      |                                                                                                                                                      |                                                                                                                                                                                  |                                                                  |                                                                  |
|------------------------------------------------------------------------------------------------------------------------------------------|-----------------------------------------------------------------------------------------------------------------------------------------------------------------------------------------------------------------------------------------------------------------------------------------------------------------------------------------|--------------------------------------------------------------------------------------------------------------------------------------------------------------------------------------------------------------------------------------------------------------------------------------|------------------------------------------------------------------------------------------------------------------|-------------------------------------------------------------------------------------------------|------------------------------------------------------------------------------------------------------------------------------------------------------------------------------------------------------------------------------------------------------------------------------------------------------|------------------------------------------------------------------------------------------------------------------------------------------------------|----------------------------------------------------------------------------------------------------------------------------------------------------------------------------------|------------------------------------------------------------------|------------------------------------------------------------------|
| <p>Score “Low risk” if a random component in the sequence generation process is described (e.g. Referring to a random number table).</p> | <p>Score “Low risk” if the unit of allocation was by institution, team or professional and allocation was performed on all units at the start of the study; or if the unit of allocation was by patient or episode of care and there was some form of centralised randomisation scheme, an on-site computer system or sealed opaque</p> | <p>Score “Low risk” if performance or patient outcomes were measured prior to the intervention, and no important differences were present across study groups. In randomised trials, score “Low risk” if imbalance did not but appropriate adjusted analysis was performed (e.g.</p> | <p>Score “Low risk” if baseline characteristics of the study and control providers are reported and similar.</p> | <p>Score “Low risk” if missing data was less than the effect size i.e. unlikely to overturn</p> | <p>Score “Low risk” if the authors state explicitly that the primary outcome variables were assessed blindly, or the outcomes are objective, e.g. length of hospital stay. Primary outcomes are those variables that correspond to the primary hypothesis or question as defined by the authors.</p> | <p>Score “Low risk” if allocation was by community, institution or practice and it is unlikely that the control group received the intervention.</p> | <p>Score “Low risk” if there is no evidence that outcomes were selectively reported (e.g. all relevant outcomes in the methods section are reported in the results section).</p> | <p>See Table 8.7.a of EPOC summary risk of bias for guidance</p> | <p>See Table 8.7.a of EPOC summary risk of bias for guidance</p> |
|------------------------------------------------------------------------------------------------------------------------------------------|-----------------------------------------------------------------------------------------------------------------------------------------------------------------------------------------------------------------------------------------------------------------------------------------------------------------------------------------|--------------------------------------------------------------------------------------------------------------------------------------------------------------------------------------------------------------------------------------------------------------------------------------|------------------------------------------------------------------------------------------------------------------|-------------------------------------------------------------------------------------------------|------------------------------------------------------------------------------------------------------------------------------------------------------------------------------------------------------------------------------------------------------------------------------------------------------|------------------------------------------------------------------------------------------------------------------------------------------------------|----------------------------------------------------------------------------------------------------------------------------------------------------------------------------------|------------------------------------------------------------------|------------------------------------------------------------------|

1  
2  
3  
4  
5  
6  
7  
8  
9  
10  
11  
12  
13  
14  
15  
16  
17  
18  
19  
20  
21  
22  
23  
24  
25  
26  
27  
28  
29  
30  
31  
32  
33  
34  
35  
36  
37  
38  
39  
40  
41  
42  
43  
44  
45  
46

|                                                                                                                                                                                  |                                                              |                                                                                           |                                                                                                                                                                                                                                             |                                                                          |                                                                                                                                                 |                                                                                         |
|----------------------------------------------------------------------------------------------------------------------------------------------------------------------------------|--------------------------------------------------------------|-------------------------------------------------------------------------------------------|---------------------------------------------------------------------------------------------------------------------------------------------------------------------------------------------------------------------------------------------|--------------------------------------------------------------------------|-------------------------------------------------------------------------------------------------------------------------------------------------|-----------------------------------------------------------------------------------------|
|                                                                                                                                                                                  | envelopes were used.                                         | Analysis of covariance ).                                                                 |                                                                                                                                                                                                                                             | the study result)                                                        |                                                                                                                                                 |                                                                                         |
| Score "High risk" when a nonrandom method is used (e.g. performed by date of admission). Non-randomised trials and controlled before-after studies should be scored "High risk". | Controlled before-after studies should be scored "High risk" | Score "High risk" if important differences were present and not adjusted for in analysis. | Score "High risk" if there is no report of characteristics in text or tables or if there are differences between control and intervention providers. Note that in some cases imbalance in patient characteristics may be due to recruitment | Score "High risk" if missing outcome data was likely to bias the results | Score "High risk" if it is likely that the control group received the intervention (e.g. if patients rather than professionals were randomised) | Score "High risk" if some important outcomes are subsequently omitted from the results. |

For peer review only



1  
2  
3  
4  
5  
6  
7  
8  
9  
10  
11  
12  
13  
14  
15  
16  
17  
18  
19  
20  
21  
22  
23  
24  
25  
26  
27  
28  
29  
30  
31  
32  
33  
34  
35  
36  
37  
38  
39  
40  
41  
42  
43  
44  
45  
46

were allocated to intervention or control)

|                                                                                                                                                                                                    |                                                     |                                                                        |                                                                                                                                           |                                                                |                                                                                                          |                                                                                                                                                                        |                                                                     |                                                            |                                                                                                                   |
|----------------------------------------------------------------------------------------------------------------------------------------------------------------------------------------------------|-----------------------------------------------------|------------------------------------------------------------------------|-------------------------------------------------------------------------------------------------------------------------------------------|----------------------------------------------------------------|----------------------------------------------------------------------------------------------------------|------------------------------------------------------------------------------------------------------------------------------------------------------------------------|---------------------------------------------------------------------|------------------------------------------------------------|-------------------------------------------------------------------------------------------------------------------|
| Unclear risk- register of all >75s living alone compiled and arranged into deciles by social contact score and randomly allocated into control and experimental arms- how randomised not specified | Unclear risk- Method of randomisation not specified | Low risk- reported and no significant differences in baseline outcomes | High risk- characteristics such as age, gender, education etc not reported, only baseline outcome measures referred to as characteristics | Low risk- similar loss to follow up in both arms, with reasons | Unclear risk- participants would be aware of their allocation, although interview assessors were blinded | Low risk- while randomised at patient level it seems very unlikely control group would have received intervention as it was not available other than through the trial | Low risk- all outcomes reported baseline were reported at follow up | Low risk- publicly funded, no competing interests declared | Low risk- while some areas unclear due to lack of reporting, unlikely to affect outcome, low risk in 5 of 9 areas |
|----------------------------------------------------------------------------------------------------------------------------------------------------------------------------------------------------|-----------------------------------------------------|------------------------------------------------------------------------|-------------------------------------------------------------------------------------------------------------------------------------------|----------------------------------------------------------------|----------------------------------------------------------------------------------------------------------|------------------------------------------------------------------------------------------------------------------------------------------------------------------------|---------------------------------------------------------------------|------------------------------------------------------------|-------------------------------------------------------------------------------------------------------------------|

|    |  |  |  |  |  |  |  |  |  |  |  |  |
|----|--|--|--|--|--|--|--|--|--|--|--|--|
| 1  |  |  |  |  |  |  |  |  |  |  |  |  |
| 2  |  |  |  |  |  |  |  |  |  |  |  |  |
| 3  |  |  |  |  |  |  |  |  |  |  |  |  |
| 4  |  |  |  |  |  |  |  |  |  |  |  |  |
| 5  |  |  |  |  |  |  |  |  |  |  |  |  |
| 6  |  |  |  |  |  |  |  |  |  |  |  |  |
| 7  |  |  |  |  |  |  |  |  |  |  |  |  |
| 8  |  |  |  |  |  |  |  |  |  |  |  |  |
| 9  |  |  |  |  |  |  |  |  |  |  |  |  |
| 10 |  |  |  |  |  |  |  |  |  |  |  |  |
| 11 |  |  |  |  |  |  |  |  |  |  |  |  |
| 12 |  |  |  |  |  |  |  |  |  |  |  |  |
| 13 |  |  |  |  |  |  |  |  |  |  |  |  |
| 14 |  |  |  |  |  |  |  |  |  |  |  |  |
| 15 |  |  |  |  |  |  |  |  |  |  |  |  |
| 16 |  |  |  |  |  |  |  |  |  |  |  |  |
| 17 |  |  |  |  |  |  |  |  |  |  |  |  |
| 18 |  |  |  |  |  |  |  |  |  |  |  |  |
| 19 |  |  |  |  |  |  |  |  |  |  |  |  |
| 20 |  |  |  |  |  |  |  |  |  |  |  |  |
| 21 |  |  |  |  |  |  |  |  |  |  |  |  |
| 22 |  |  |  |  |  |  |  |  |  |  |  |  |
| 23 |  |  |  |  |  |  |  |  |  |  |  |  |
| 24 |  |  |  |  |  |  |  |  |  |  |  |  |
| 25 |  |  |  |  |  |  |  |  |  |  |  |  |
| 26 |  |  |  |  |  |  |  |  |  |  |  |  |
| 27 |  |  |  |  |  |  |  |  |  |  |  |  |
| 28 |  |  |  |  |  |  |  |  |  |  |  |  |
| 29 |  |  |  |  |  |  |  |  |  |  |  |  |
| 30 |  |  |  |  |  |  |  |  |  |  |  |  |
| 31 |  |  |  |  |  |  |  |  |  |  |  |  |
| 32 |  |  |  |  |  |  |  |  |  |  |  |  |
| 33 |  |  |  |  |  |  |  |  |  |  |  |  |
| 34 |  |  |  |  |  |  |  |  |  |  |  |  |
| 35 |  |  |  |  |  |  |  |  |  |  |  |  |
| 36 |  |  |  |  |  |  |  |  |  |  |  |  |
| 37 |  |  |  |  |  |  |  |  |  |  |  |  |
| 38 |  |  |  |  |  |  |  |  |  |  |  |  |
| 39 |  |  |  |  |  |  |  |  |  |  |  |  |
| 40 |  |  |  |  |  |  |  |  |  |  |  |  |
| 41 |  |  |  |  |  |  |  |  |  |  |  |  |
| 42 |  |  |  |  |  |  |  |  |  |  |  |  |
| 43 |  |  |  |  |  |  |  |  |  |  |  |  |
| 44 |  |  |  |  |  |  |  |  |  |  |  |  |
| 45 |  |  |  |  |  |  |  |  |  |  |  |  |
| 46 |  |  |  |  |  |  |  |  |  |  |  |  |



|  |                               |  |  |  |          |  |  |                                  |
|--|-------------------------------|--|--|--|----------|--|--|----------------------------------|
|  | corrected for baseline scores |  |  |  | declared |  |  |                                  |
|  |                               |  |  |  |          |  |  | Low risk: Evidence from two RCTs |
|  |                               |  |  |  |          |  |  | Overall:                         |

Physical Activity

|                                                                                                                                   |                                                                                                                                                                                                                    |                                                                                                                                                                |                                                                                                           |                                                                                                                                                                                          |                                                                                                                                                                                                                                                                                               |                                                                                                                                              |                                                                                                                                                                           |                                                           |                                                           |
|-----------------------------------------------------------------------------------------------------------------------------------|--------------------------------------------------------------------------------------------------------------------------------------------------------------------------------------------------------------------|----------------------------------------------------------------------------------------------------------------------------------------------------------------|-----------------------------------------------------------------------------------------------------------|------------------------------------------------------------------------------------------------------------------------------------------------------------------------------------------|-----------------------------------------------------------------------------------------------------------------------------------------------------------------------------------------------------------------------------------------------------------------------------------------------|----------------------------------------------------------------------------------------------------------------------------------------------|---------------------------------------------------------------------------------------------------------------------------------------------------------------------------|-----------------------------------------------------------|-----------------------------------------------------------|
| Score “Low risk” if a random component in the sequence generation process is described (e.g. Referring to a random number table). | Score “Low risk” if the unit of allocation was by institution, team or professional and allocation was performed on all units at the start of the study; or if the unit of allocation was by patient or episode of | Score “Low risk” if performance or patient outcomes were measured prior to the intervention, and no important differences were present across study groups. In | Score “Low risk” if baseline characteristics of the study and control providers are reported and similar. | Score “Low risk” if missing outcome measures were unlikely to bias the results (e.g. the proportion of missing data was similar in the intervention and control groups or the proportion | Score “Low risk” if the authors state explicitly that the primary outcome variables were assessed blindly, or the outcomes are objective, e.g. length of hospital stay. Primary outcomes are those variables that correspond to the primary hypothesis or question as defined by the authors. | Score “Low risk” if allocation was by community, institution or practice and it is unlikely that the control group received the intervention | Score “Low risk” if there is no evidence that outcomes were selectively reported (e.g. all relevant outcomes in the methods section are reported in the results section). | See Table 8.7.a of EPOC summary risk of bias for guidance | See Table 8.7.a of EPOC summary risk of bias for guidance |
|-----------------------------------------------------------------------------------------------------------------------------------|--------------------------------------------------------------------------------------------------------------------------------------------------------------------------------------------------------------------|----------------------------------------------------------------------------------------------------------------------------------------------------------------|-----------------------------------------------------------------------------------------------------------|------------------------------------------------------------------------------------------------------------------------------------------------------------------------------------------|-----------------------------------------------------------------------------------------------------------------------------------------------------------------------------------------------------------------------------------------------------------------------------------------------|----------------------------------------------------------------------------------------------------------------------------------------------|---------------------------------------------------------------------------------------------------------------------------------------------------------------------------|-----------------------------------------------------------|-----------------------------------------------------------|

1  
2  
3  
4  
5  
6  
7  
8  
9  
10  
11  
12  
13  
14  
15  
16  
17  
18  
19  
20  
21  
22  
23  
24  
25  
26  
27  
28  
29  
30  
31  
32  
33  
34  
35  
36  
37  
38  
39  
40  
41  
42  
43  
44  
45  
46

|                                                                                                                                                   |                                                                                                                                           |                                                                                                                                        |                                                                                                                                                                                     |                                                                                 |  |                                                                     |                                                                                                                                                           |                                                                                                |  |  |  |
|---------------------------------------------------------------------------------------------------------------------------------------------------|-------------------------------------------------------------------------------------------------------------------------------------------|----------------------------------------------------------------------------------------------------------------------------------------|-------------------------------------------------------------------------------------------------------------------------------------------------------------------------------------|---------------------------------------------------------------------------------|--|---------------------------------------------------------------------|-----------------------------------------------------------------------------------------------------------------------------------------------------------|------------------------------------------------------------------------------------------------|--|--|--|
|                                                                                                                                                   | <p>care and there was some form of centralised randomisation scheme, an on-site computer system or sealed opaque envelopes were used.</p> | <p>randomised trials, score “Low risk” if imbalance adjusted but appropriate analysis was performed (e.g. Analysis of covariance).</p> | <p>of missing data was less than the effect size i.e. unlikely to overturn the study result)</p>                                                                                    |                                                                                 |  |                                                                     |                                                                                                                                                           |                                                                                                |  |  |  |
| <p>Score “High risk” when a nonrandom method is used (e.g. performed by date of admission). Non-randomised trials and controlled before-after</p> | <p>Controlled before-after studies should be scored “High risk”</p>                                                                       | <p>Score “High risk” if important differences were present and not adjusted for in analysis.</p>                                       | <p>Score “High risk” if there is no report of characteristics in text or tables or if there are differences between control and intervention providers. Note that in some cases</p> | <p>Score “High risk” if missing outcome data was likely to bias the results</p> |  | <p>Score “High risk” if the outcomes were not assessed blindly.</p> | <p>Score “High risk” if it is likely that the control group received the intervention (e.g. if patients rather than professional s were randomised ).</p> | <p>Score “High risk” if some important outcomes are subsequently omitted from the results.</p> |  |  |  |

1  
2  
3  
4  
5  
6  
7  
8  
9  
10  
11  
12  
13  
14  
15  
16  
17  
18  
19  
20  
21  
22  
23  
24  
25  
26  
27  
28  
29  
30  
31  
32  
33  
34  
35  
36  
37  
38  
39  
40  
41  
42  
43  
44  
45  
46

|                                                            |                                                                                                                                                         |                                                                                                                                |                                                           |
|------------------------------------------------------------|---------------------------------------------------------------------------------------------------------------------------------------------------------|--------------------------------------------------------------------------------------------------------------------------------|-----------------------------------------------------------|
| <p>studies should be scored "High risk".</p>               | <p>imbalance in patient characteristics may be due to recruitment bias whereby the provider was responsible for recruiting patients into the trial.</p> |                                                                                                                                |                                                           |
| <p>Score "Unclear risk" if not specified in the paper.</p> | <p>If randomised trials have no baseline measure of outcome, "Unclear risk".</p>                                                                        | <p>Score "Unclear risk" if not clear in the paper (e.g. characteristics are mentioned in text but no data were presented).</p> | <p>Score "Unclear risk" if not specified in the paper</p> |

1  
2  
3  
4  
5  
6  
7  
8  
9  
10  
11  
12  
13  
14  
15  
16  
17  
18  
19  
20  
21  
22  
23  
24  
25  
26  
27  
28  
29  
30  
31  
32  
33  
34  
35  
36  
37  
38  
39  
40  
41  
42  
43  
44  
45  
46

|                                                                                                                                                                                                  |                                                    |                                                                       |                                                                                                                                  |                                                               |                                                                                                         |                                                                                                                                                                       |                                                  |                                                           |                                                                                                                  |
|--------------------------------------------------------------------------------------------------------------------------------------------------------------------------------------------------|----------------------------------------------------|-----------------------------------------------------------------------|----------------------------------------------------------------------------------------------------------------------------------|---------------------------------------------------------------|---------------------------------------------------------------------------------------------------------|-----------------------------------------------------------------------------------------------------------------------------------------------------------------------|--------------------------------------------------|-----------------------------------------------------------|------------------------------------------------------------------------------------------------------------------|
|                                                                                                                                                                                                  |                                                    |                                                                       |                                                                                                                                  |                                                               | s could have occurred (e.g. physicians within practices were allocated to intervention or control)      | missing results in a synthesis.                                                                                                                                       |                                                  |                                                           |                                                                                                                  |
| Unclear risk-register of all >75s living alone compiled and arranged into deciles by cosial contact score and randomly allocated into control and experimental arms-how randomised not specified | Unclear risk-Method of randomisation not sepcified | Low risk-reported and no significant differences in baseline outcomes | High risk-characteristics such as age, education etc not reported, only baseline outcome measures referred to as characteristics | Low risk-similar loss to follow up in both arms, with reasons | Unclear risk-participants would be aware of their allocation, although interview assessors were blinded | Low risk-while randomised at patient level it seems very unlikely control group would have recieved intervention as it was not available other than through the trial | Low risk-all outcomes reported were at follow up | Low risk-pulicly funded, no competin g interests declared | Low risk-while some areas unclear due to lack of reporting, unlikely to affect outcome, low risk in 5 of 9 areas |

1  
2  
3  
4  
5  
6  
7  
8  
9  
10  
11  
12  
13  
14  
15  
16  
17  
18  
19  
20  
21  
22  
23  
24  
25  
26  
27  
28  
29  
30  
31  
32  
33  
34  
35  
36  
37  
38  
39  
40  
41  
42  
43  
44  
45  
46

|                                                                                              |                                          |                                                                                                                                   |                                                                                                                                                                 |                                                                                                                                                          |                                                                                                                            |                                                                                                                                                                 |                                             |                                                                                                                         |                                             |                                                                                  |
|----------------------------------------------------------------------------------------------|------------------------------------------|-----------------------------------------------------------------------------------------------------------------------------------|-----------------------------------------------------------------------------------------------------------------------------------------------------------------|----------------------------------------------------------------------------------------------------------------------------------------------------------|----------------------------------------------------------------------------------------------------------------------------|-----------------------------------------------------------------------------------------------------------------------------------------------------------------|---------------------------------------------|-------------------------------------------------------------------------------------------------------------------------|---------------------------------------------|----------------------------------------------------------------------------------|
| <p>Low risk: Sequenced numbered envelopes prepared by research team, block randomisation</p> | <p>Low risk: sealed opaque envelopes</p> | <p>Low risk: no important differences and baseline scores were adjusted for in analysis</p>                                       | <p>low risk: control were slightly more likely to be male and younger but otherwise comparable, this had no impact on results when adjusted for in analysis</p> | <p>Low risk: similar amounts of missing data in both arms, at 67%, however this reduced power to detect a difference as required sample size was 161</p> | <p>Unclear risk: due to the nature of the intervention not possible to blind participants but assessors blinded</p>        | <p>Unclear risk: randomisation was at the patient level within practices, unclear if it could self refer to the project which was running in the local area</p> | <p>Low risk: all outcomes were reported</p> | <p>Low risk: No other risks identified. Funded by Avon health authority, no competing interests declared.</p>           | <p>Low risk: in 7 of 9 areas</p>            | <p>Overall RCTs: Low risk, most evidence comes from RCTs at low risk of bias</p> |
| <p>High risk: controlled before after study</p>                                              | <p>High risk: CBA</p>                    | <p>low risk: significant differences in baseline scores, although linear regression model used which would have corrected for</p> | <p>High risk: significant differences in living arrangement, education, work status, adjustments for same did not significantly alter results, suggesting</p>   | <p>High risk: control follow up 43%, intervention 35%, no data on whether those LTFup had different characteristics</p>                                  | <p>High risk: due to the nature of the intervention not possible to assess outcomes blindly and patients self reported</p> | <p>Low risk: the service was not available in areas where the control lived</p>                                                                                 | <p>Low risk: all outcomes were reported</p> | <p>Low risk: No other risks identified. Funded by DoH, independent research group, no competing interests declared.</p> | <p>High risk: high risk in 5 of 9 areas</p> |                                                                                  |

|                                          |                                                              |                                                                                     |                                                                                                 |                                          |                                                                                                                     |                                                                          |                                      |                                                                                                  |                                                 |                                                                                                                                                                                                                                             |
|------------------------------------------|--------------------------------------------------------------|-------------------------------------------------------------------------------------|-------------------------------------------------------------------------------------------------|------------------------------------------|---------------------------------------------------------------------------------------------------------------------|--------------------------------------------------------------------------|--------------------------------------|--------------------------------------------------------------------------------------------------|-------------------------------------------------|---------------------------------------------------------------------------------------------------------------------------------------------------------------------------------------------------------------------------------------------|
|                                          |                                                              | baseline scores                                                                     | other unknown imbalances                                                                        |                                          |                                                                                                                     |                                                                          |                                      |                                                                                                  |                                                 |                                                                                                                                                                                                                                             |
| High risk: controlled before after study | Unclear risk: practices randomly assigned but how not stated | Low risk: significant differences in baseline- explicitly corrected for in analysis | High risk: differences in baseline characteristics although these were adjusted for in analysis | Low risk: 76% follow up int, 92% control | High risk: due to the nature of the intervention not possible to assess outcomes blindly and patients self reported | Low risk: the service was not available in areas where the control lived | Low risk: all outcomes were reported | Low risk: No other risks identified. Funded by NHS Hackney CCG, no competing interests declared. | High risk: High or unclear risk in 4 of 9 areas | Overall nRCTs: High Risk: One study at very high risk of bias and one at high risk of bias<br><br>Overall: High risk due to inclusion of CBAs, without these low risk, although some concerns about allocation concealment that is inherent |

to the  
interventi  
on

Health Care Utilisation

|                                                                                                                                          |                                                                                                                                                                                                                                                        |                                                                                                                                                                                                |                                                                                                                  |                                                                                                                                                                                                 |                                                                                                                                                                                                                                                                                                      |                                                                                                                                                     |                                                                                                                                                                                  |                                                             |                                                             |
|------------------------------------------------------------------------------------------------------------------------------------------|--------------------------------------------------------------------------------------------------------------------------------------------------------------------------------------------------------------------------------------------------------|------------------------------------------------------------------------------------------------------------------------------------------------------------------------------------------------|------------------------------------------------------------------------------------------------------------------|-------------------------------------------------------------------------------------------------------------------------------------------------------------------------------------------------|------------------------------------------------------------------------------------------------------------------------------------------------------------------------------------------------------------------------------------------------------------------------------------------------------|-----------------------------------------------------------------------------------------------------------------------------------------------------|----------------------------------------------------------------------------------------------------------------------------------------------------------------------------------|-------------------------------------------------------------|-------------------------------------------------------------|
| <p>Score “Low risk” if a random component in the sequence generation process is described (e.g. Referring to a random number table).</p> | <p>Score “Low risk” if the unit of allocation was by institution, team or professional and allocation was performed on all units at the start of the study; or if the unit of allocation was by patient or episode of care and there was some form</p> | <p>Score “Low risk” if performance or patient outcomes were measured prior to the intervention, and no important differences were present across study groups. In randomised trials, score</p> | <p>Score “Low risk” if baseline characteristics of the study and control providers are reported and similar.</p> | <p>Score “Low risk” if missing outcome measures were unlikely to bias the results (e.g. the proportion of missing data was similar in the intervention and control groups or the proportion</p> | <p>Score “Low risk” if the authors state explicitly that the primary outcome variables were assessed blindly, or the outcomes are objective, e.g. length of hospital stay. Primary outcomes are those variables that correspond to the primary hypothesis or question as defined by the authors.</p> | <p>Score “Low risk” if allocation was by community, institution or practice and it is unlikely that the control group received the intervention</p> | <p>Score “Low risk” if there is no evidence that outcomes were selectively reported (e.g. all relevant outcomes in the methods section are reported in the results section).</p> | <p>See Table 8.7.a of EPOC summary of bias for guidance</p> | <p>See Table 8.7.a of EPOC summary of bias for guidance</p> |
|------------------------------------------------------------------------------------------------------------------------------------------|--------------------------------------------------------------------------------------------------------------------------------------------------------------------------------------------------------------------------------------------------------|------------------------------------------------------------------------------------------------------------------------------------------------------------------------------------------------|------------------------------------------------------------------------------------------------------------------|-------------------------------------------------------------------------------------------------------------------------------------------------------------------------------------------------|------------------------------------------------------------------------------------------------------------------------------------------------------------------------------------------------------------------------------------------------------------------------------------------------------|-----------------------------------------------------------------------------------------------------------------------------------------------------|----------------------------------------------------------------------------------------------------------------------------------------------------------------------------------|-------------------------------------------------------------|-------------------------------------------------------------|

1  
2  
3  
4  
5  
6  
7  
8  
9  
10  
11  
12  
13  
14  
15  
16  
17  
18  
19  
20  
21  
22  
23  
24  
25  
26  
27  
28  
29  
30  
31  
32  
33  
34  
35  
36  
37  
38  
39  
40  
41  
42  
43  
44  
45  
46

|                                                                                                                                                                                 |                                                                                                                                             |                                                                                                                                                                                                                          |                                                                                                                                                                                                                                                          |
|---------------------------------------------------------------------------------------------------------------------------------------------------------------------------------|---------------------------------------------------------------------------------------------------------------------------------------------|--------------------------------------------------------------------------------------------------------------------------------------------------------------------------------------------------------------------------|----------------------------------------------------------------------------------------------------------------------------------------------------------------------------------------------------------------------------------------------------------|
| <p>of centralised randomisation scheme, an on-site computer system or sealed opaque envelopes were used.</p>                                                                    | <p>“Low risk” if imbalance did but appropriate adjusted analysis was performed (e.g. Analysis of covariance).</p>                           | <p>n of missing data was less than the effect size i.e. unlikely to overturn the study result)</p>                                                                                                                       |                                                                                                                                                                                                                                                          |
| <p>Score “High risk” when a nonrandom method is used (e.g. performed by date of admission). Non-randomised trials and controlled before-after studies should be “High risk”</p> | <p>Controlled before-after studies should be scored “High risk” if important differences were present and not adjusted for in analysis.</p> | <p>Score “High risk” if there is no report of characteristics in text or tables or if there are differences between control and intervention providers. Note that in some cases imbalance in patient characteristics</p> | <p>Score “High risk” if it is likely that the control group received the intervention (e.g. if patients rather than professionals were randomised).<br/><br/>Score “High risk” if some important outcomes are subsequently omitted from the results.</p> |



1  
2  
3  
4  
5  
6  
7  
8  
9  
10  
11  
12  
13  
14  
15  
16  
17  
18  
19  
20  
21  
22  
23  
24  
25  
26  
27  
28  
29  
30  
31  
32  
33  
34  
35  
36  
37  
38  
39  
40  
41  
42  
43  
44  
45  
46

|                                                                            |                                                                                                                                                                                                         |                                                                                                                                                                                                                                                                                                                                                                                                                                                                                                         |
|----------------------------------------------------------------------------|---------------------------------------------------------------------------------------------------------------------------------------------------------------------------------------------------------|---------------------------------------------------------------------------------------------------------------------------------------------------------------------------------------------------------------------------------------------------------------------------------------------------------------------------------------------------------------------------------------------------------------------------------------------------------------------------------------------------------|
| <p>scored<br/>"High risk".</p>                                             | <p>ics may be<br/>due to<br/>recruitment<br/>bias<br/>whereby<br/>the<br/>provider<br/>was<br/>responsible<br/>for<br/>recruiting<br/>patients<br/>into the<br/>trial.</p>                              |                                                                                                                                                                                                                                                                                                                                                                                                                                                                                                         |
| <p>Score<br/>"Unclear<br/>risk" if not<br/>specified in<br/>the paper.</p> | <p>Score<br/>"Unclear<br/>risk" if not<br/>specified in<br/>the paper.<br/>If<br/>randomis<br/>ed trials<br/>have no<br/>baseline<br/>measure<br/>of<br/>outcome,<br/>score<br/>"Unclear<br/>risk".</p> | <p>Score<br/>"Unclear<br/>risk" if<br/>not<br/>specified<br/>in the<br/>paper (Do<br/>not<br/>assume<br/>100%<br/>follow up<br/>unless<br/>stated<br/>explicitly)<br/>.</p> <p>Score<br/>"Unclear<br/>risk" if not<br/>specified in the<br/>paper</p> <p>Score<br/>"Unclear<br/>risk" if not<br/>specified<br/>in the<br/>paper. For<br/>further<br/>informatio<br/>n see<br/>Chapter<br/>13 of the<br/>Cochrane<br/>handbook:<br/>Assessing<br/>risk of bias<br/>due to<br/>missing<br/>results in</p> |

physicians within practices were allocated to intervention or control) a synthesis.

|                                                                                                                                                                                                            |                                                           |                                                                              |                                                                                                                                 |                                                                      |                                                                                                                                                |                                                                                                                                                                   |                                                                           |                                                                  |                                                                                                                         |
|------------------------------------------------------------------------------------------------------------------------------------------------------------------------------------------------------------|-----------------------------------------------------------|------------------------------------------------------------------------------|---------------------------------------------------------------------------------------------------------------------------------|----------------------------------------------------------------------|------------------------------------------------------------------------------------------------------------------------------------------------|-------------------------------------------------------------------------------------------------------------------------------------------------------------------|---------------------------------------------------------------------------|------------------------------------------------------------------|-------------------------------------------------------------------------------------------------------------------------|
| <p>Unclear risk-register of all &gt;75s living alone compiled and arranged into deciles by social contact score and randomly allocated into control and experimental arms-how randomised not specified</p> | <p>Unclear risk-Method of randomisation not specified</p> | <p>Low risk-reported and no significant differences in baseline outcomes</p> | <p>High risk-characteristics such as age, education etc not reported, only baseline measures referred to as characteristics</p> | <p>Low risk-similar loss to follow up in both arms, with reasons</p> | <p>Low risk-participants would be aware of their allocation, although interview assessors were blinded. HCU was self reported to assessors</p> | <p>Low risk-while randomised at patient level it seems very unlikely control group would have received intervention as it was not available through the trial</p> | <p>Low risk-all outcomes reported baseline were reported at follow up</p> | <p>Low risk-publicly funded, no competing interests declared</p> | <p>Low risk-while some areas unclear due to lack of reporting, unlikely to affect outcome, low risk in 5 of 9 areas</p> |
|------------------------------------------------------------------------------------------------------------------------------------------------------------------------------------------------------------|-----------------------------------------------------------|------------------------------------------------------------------------------|---------------------------------------------------------------------------------------------------------------------------------|----------------------------------------------------------------------|------------------------------------------------------------------------------------------------------------------------------------------------|-------------------------------------------------------------------------------------------------------------------------------------------------------------------|---------------------------------------------------------------------------|------------------------------------------------------------------|-------------------------------------------------------------------------------------------------------------------------|

|    |             |            |               |             |  |  |  |  |  |
|----|-------------|------------|---------------|-------------|--|--|--|--|--|
| 1  |             |            |               |             |  |  |  |  |  |
| 2  |             |            |               |             |  |  |  |  |  |
| 3  |             |            |               |             |  |  |  |  |  |
| 4  |             |            | low risk:     |             |  |  |  |  |  |
| 5  |             |            | control       |             |  |  |  |  |  |
| 6  |             |            | were          |             |  |  |  |  |  |
| 7  |             |            | slightly      |             |  |  |  |  |  |
| 8  |             |            | more likely   |             |  |  |  |  |  |
| 9  |             |            | to be male    | Low risk:   |  |  |  |  |  |
| 10 |             | Low risk:  | and           | similar     |  |  |  |  |  |
| 11 |             | no         | younger       | amounts     |  |  |  |  |  |
| 12 |             | important  | but           | of          |  |  |  |  |  |
| 13 | Low risk:   | difference | otherwise     | missing     |  |  |  |  |  |
| 14 | Sequenced   | s and      | comparable    | data in     |  |  |  |  |  |
| 15 | numbered    | baseline   | , this had    | both        |  |  |  |  |  |
| 16 | envelopes   | scores     | no impact     | arms,       |  |  |  |  |  |
| 17 | prepared    | were       | on results    | data on     |  |  |  |  |  |
| 18 | by research | adjusted   | when          | HCU         |  |  |  |  |  |
| 19 | team, block | for in     | adjusted for  | available   |  |  |  |  |  |
| 20 | randomisat  | analysis   | in analysis   | for 157     |  |  |  |  |  |
| 21 | ion         |            |               |             |  |  |  |  |  |
| 22 |             |            |               |             |  |  |  |  |  |
| 23 | Low risk:   |            |               |             |  |  |  |  |  |
| 24 | computeris  |            |               |             |  |  |  |  |  |
| 25 | ed          |            |               |             |  |  |  |  |  |
| 26 | generated   |            |               |             |  |  |  |  |  |
| 27 | algorithm   |            |               |             |  |  |  |  |  |
| 28 | with        |            |               |             |  |  |  |  |  |
| 29 | blocks,     |            |               |             |  |  |  |  |  |
| 30 | performed   |            |               |             |  |  |  |  |  |
| 31 | by study    |            |               |             |  |  |  |  |  |
| 32 | team        |            | Low risk:     |             |  |  |  |  |  |
| 33 | member      |            | there were    | Low risk:   |  |  |  |  |  |
| 34 | not         | Low risk:  | slightly more | 100%        |  |  |  |  |  |
| 35 | associated  | Baseline   | participants  | data        |  |  |  |  |  |
| 36 | with        | outcome    | of hispanic   | available   |  |  |  |  |  |
| 37 | outcomes    | measures   | ethnicity in  | for health  |  |  |  |  |  |
| 38 | assessment  | were       | one arm-0     | care        |  |  |  |  |  |
| 39 |             | similar    | vs 3.7%       | utilisation |  |  |  |  |  |
| 40 |             |            |               |             |  |  |  |  |  |
| 41 |             |            |               |             |  |  |  |  |  |
| 42 |             |            |               |             |  |  |  |  |  |
| 43 |             |            |               |             |  |  |  |  |  |
| 44 |             |            |               |             |  |  |  |  |  |
| 45 |             |            |               |             |  |  |  |  |  |
| 46 |             |            |               |             |  |  |  |  |  |

|                                                                                                                                |                                            |                                                                     |                                                                            |                                                           |                                                                                               |                                                                                                                                                             |                                      |                                                                                          |                                                                                                                                                         |                                                          |
|--------------------------------------------------------------------------------------------------------------------------------|--------------------------------------------|---------------------------------------------------------------------|----------------------------------------------------------------------------|-----------------------------------------------------------|-----------------------------------------------------------------------------------------------|-------------------------------------------------------------------------------------------------------------------------------------------------------------|--------------------------------------|------------------------------------------------------------------------------------------|---------------------------------------------------------------------------------------------------------------------------------------------------------|----------------------------------------------------------|
|                                                                                                                                |                                            |                                                                     |                                                                            |                                                           |                                                                                               |                                                                                                                                                             |                                      | outcomes are reported along with statistical significance.                               |                                                                                                                                                         |                                                          |
| Low risk: computerised generated algorithm with blocks, performed by study team member not associated with outcomes assessment | Low risk: centralised randomisation scheme | Low risk: Baseline outcome measures were similar                    | Low risk: Intervention group were more likely to be employed 20% vs 8%     | Low risk: 100% data available for health care utilisation | Low risk- Hospitalisation data from routine sources and assessors/statisticians were blinded. | High risk: randomisation was at the patient level, however unlikely they received controls received the intervention, so not a major factor for overall ROB | Low risk: all outcomes are reported  | The authors offer commercial consulting services on setting up similar CHW interventions | Low risk-low risk 7/9 areas and other domains such as allocation inherent to nature of intervention or contamination due to patient level randomisation | Overall RCTs: Low risk of bias                           |
| High risk: controlled before after study                                                                                       | High risk: CBA                             | High risk: significant differences in baseline scores, and controls | High risk: significant differences in living arrangements, education, work | Low risk: use of anonymised GP data meant no missing data | Low risk- anonymised data from GP records                                                     | Low risk: the service was not available in areas where the control lived                                                                                    | Low risk: all outcomes were reported | Low risk: No other risks identified. Funded by DoH, independent                          | High risk: high risk in 4 of 9 areas                                                                                                                    | Overall nRCTs: High risk of bias due to control mismatch |

1  
2  
3  
4  
5  
6  
7  
8  
9  
10  
11  
12  
13  
14  
15  
16  
17  
18  
19  
20  
21  
22  
23  
24  
25  
26  
27  
28  
29  
30  
31  
32  
33  
34  
35  
36  
37  
38  
39  
40  
41  
42  
43  
44  
45  
46

|  |                                                                                                                                  |                                                                                                              |  |                                                         |  |                                                                        |
|--|----------------------------------------------------------------------------------------------------------------------------------|--------------------------------------------------------------------------------------------------------------|--|---------------------------------------------------------|--|------------------------------------------------------------------------|
|  | <p>were drawn from same practice population, but not deemed suitable for referral (different to controls for other outcomes)</p> | <p>status, adjustments for same did not significantly alter results, suggesting other unknown imbalances</p> |  | <p>research group, no competing interests declared.</p> |  | <p>ch in particular</p>                                                |
|  |                                                                                                                                  |                                                                                                              |  |                                                         |  | <p>Overall:<br/>Low risk of bias for RCTs, only 1 CBA at high risk</p> |

view only

## Summary of findings:

**Social prescribing link workers compared to usual care for people with multimorbidity**

Patient or population: people with multimorbidity

Setting: Primary Care

Intervention: social prescribing link workers

Comparison: usual care

| Outcomes                                                                                                                                   | Impact                                                                                                                                                                                                                                                                                                                                   | № of participants (studies)    | Certainty of the evidence (GRADE) |
|--------------------------------------------------------------------------------------------------------------------------------------------|------------------------------------------------------------------------------------------------------------------------------------------------------------------------------------------------------------------------------------------------------------------------------------------------------------------------------------------|--------------------------------|-----------------------------------|
| Health related quality of life (RCTs) assessed with: SF-12 HRQoL measure follow-up: range 6 months to 9 months                             | Two RCTs reported no difference in the physical health component of the SF-12. One of these trials showed a positive impact on the mental health component of the SF-12 ( 2.3 vs -0.2 p= 0.008. ), but the other showed no difference.                                                                                                   | 894 (2 RCTs)                   | ⊕⊕○○<br>Low <sup>a,b</sup>        |
| Health related quality of life (CBAs) assessed with: EQ-5D and SF-12 HRQoL measures follow-up: range 3 months to 9 months                  | One CBA reported no difference in the MCS or PCS of the SF-12. The same trial reported a small change in the EQ-5D-3L in favour of the control group ( -0.09 (-0.14 to -0.03) p<0.001). The second CBA found no difference in the EQ-5D-5L.                                                                                              | 1292 (2 observational studies) | ⊕○○○<br>Very low <sup>c</sup>     |
| Mental Health (RCTs) assessed with: Mental Health as assessed by the hospital anxiety depression scale follow-up: mean 4 months            | One RCT found an improvement in the anxiety component of the HADS ( -1.9 (-3.0 to -0.7) a p=0.002 ) , but not the depression component (-0.9 (-1.9 to 0.2) p=0.116)                                                                                                                                                                      | 152 (1 RCT)                    | ⊕⊕○○<br>Low <sup>d,e</sup>        |
| Mental Health (CBAs) assessed with: Mental health as assessed by a screening tool for mental illness follow-up: range 3 months to 9 months | One CBA reported no difference in the geriatric depression scale. Two CBAs found no difference in the HADS anxiety or depression scales.                                                                                                                                                                                                 | 1772 (3 observational studies) | ⊕○○○<br>Very low <sup>f,g</sup>   |
| Social support and contacts (RCTs) follow-up: range 4 months to 24 months                                                                  | One RCT of a two year intervention for people aged over 75 found no difference in Tunstalls social contact score. One RCT of a one month intervention found no difference in Dukes Social Support Scale.                                                                                                                                 | 714 (2 RCTs)                   | ⊕⊕○○<br>Low <sup>h,i</sup>        |
| Social contacts and supports (CBAs) follow-up: mean 8 months                                                                               | One CBA looked at social support as measured by the Medical outcomes survey: social support scale and found no difference.                                                                                                                                                                                                               | 392 (1 observational study)    | ⊕○○○<br>Very low <sup>i</sup>     |
| Self rated health (RCTs) follow-up: range 4 months to 24 months                                                                            | Two RCTs examined self rated health. One using a simple scale reported a greater % improved in the intervention (20%) than control group (11%). The other used the WONCA-COOP functional health scale that includes a measure of overall health and found an improvement favouring the intervention group (-0.4 (-0.7 to -0.1) p=0.003). | 734 (2 RCTs)                   | ⊕⊕○○<br>Low <sup>k,l</sup>        |

Summary of findings:

Social prescribing link workers compared to usual care for people with multimorbidity

Patient or population: people with multimorbidity

Setting: Primary Care

Intervention: social prescribing link workers

Comparison: usual care

| Outcomes                                                                                                                                    | Impact                                                                                                                                                                                                                                                                                                                                                                                                                                     | № of participants (studies)    | Certainty of the evidence (GRADE) |
|---------------------------------------------------------------------------------------------------------------------------------------------|--------------------------------------------------------------------------------------------------------------------------------------------------------------------------------------------------------------------------------------------------------------------------------------------------------------------------------------------------------------------------------------------------------------------------------------------|--------------------------------|-----------------------------------|
| Self rated health (CBAs) assessed with: Likert scale from 1 (poorest health) to 5 (best health) follow-up: mean 8 months                    | One CBA examined self rated health and found no difference between groups. ( 0.127 (-0.221, 0.9475) p=not reported )                                                                                                                                                                                                                                                                                                                       | 480 (1 observational study)    | ⊕○○○<br>Very low <sup>m</sup>     |
| Physical Activities (RCTs) assessed with: Any measurement of daily activities or exercise follow-up: range 4 months to 24 months            | One RCT of 152 adults found an improvement in daily activities (Daily Activities -0.5 (-0.6 to -0.2) p=0.001) but no effect on physical fitness ( -0.3 (-0.6 to 0.05) p=0.98). The other of a 2 year intervention in adults over 75 found no difference in activities of daily living.                                                                                                                                                     | 712 (2 RCTs)                   | ⊕○○○<br>Very low <sup>n,o,p</sup> |
| Physical activities (CBAs) assessed with: Any measure of daily activities or exercise follow-up: mean 8.5 months                            | One CBA found no difference in self reported exercise. The other found a decrease in daily activities in the intervention group (-0.897 (-1.729 to -0.065) p=0.035).                                                                                                                                                                                                                                                                       | 1380 (2 observational studies) | ⊕○○○<br>Very low <sup>q,r,s</sup> |
| Hospitalisations (RCTs) assessed with: Number of hospital admissions and number of days hospitalised follow-up: range 9 months to 12 months | Two RCTs reported a decrease in hospitalisations in the intervention group. One found a reduction in days in hospital (300 days vs 471 days; absolute event rate reduction,65%) at nine months. The other reported a reduction in hospitalisations and hospital days in the intervention group-68 total hospitalizations (278 hospital days) versus 98 (414 hospital days) in the control group. Neither reached statistical significance. | 894 (2 RCTs)                   | ⊕⊕○○<br>Low <sup>t,u</sup>        |
| Primary Care Utilisation (RCTs) follow-up: range 4 months to 24 months                                                                      | Neither RCT found a difference between groups for contacts with the primary care team.                                                                                                                                                                                                                                                                                                                                                     | 714 (2 RCTs)                   | ⊕⊕○○<br>Low <sup>v,w</sup>        |
| Primary Care Utilisation (CBAs) follow-up: mean 8 months                                                                                    | The authors reported a reduction in the number of primary care visits in the intervention group and an increase in the control group, but because of baseline imbalances in the groups it was difficult to attribute this change to the intervention.                                                                                                                                                                                      | 480 (1 observational study)    | ⊕○○○<br>Very low <sup>x,y</sup>   |

\*The risk in the intervention group (and its 95% confidence interval) is based on the assumed risk in the comparison group and the relative effect of the intervention (and its 95% CI).

CI: confidence interval

## Summary of findings:

**Social prescribing link workers compared to usual care for people with multimorbidity**

**Patient or population:** people with multimorbidity

**Setting:** Primary Care

**Intervention:** social prescribing link workers

**Comparison:** usual care

| Outcomes | Impact | № of participants (studies) | Certainty of the evidence (GRADE) |
|----------|--------|-----------------------------|-----------------------------------|
|----------|--------|-----------------------------|-----------------------------------|

**GRADE Working Group grades of evidence**

**High certainty:** we are very confident that the true effect lies close to that of the estimate of the effect.

**Moderate certainty:** we are moderately confident in the effect estimate: the true effect is likely to be close to the estimate of the effect, but there is a possibility that it is substantially different.

**Low certainty:** our confidence in the effect estimate is limited: the true effect may be substantially different from the estimate of the effect.

**Very low certainty:** we have very little confidence in the effect estimate: the true effect is likely to be substantially different from the estimate of effect.

**Explanations**

- a. The two RCTs examined a similar intervention but found different results for the MCS of the SF-12
- b. The two RCTs were conducted in a single health care setting and may not transfer to other healthcare settings
- c. One RCT looked at a deprived population over nine months, the other looked at an older, less deprived population over three months
- d. The population was less deprived than in other studies and the usual target populations for link worker interventions and the intervention was only one month long
- e. The confidence interval for anxiety included a change that was clinically insignificant.
- f. Risk of bias was high in one CBA due to missing data, baseline differences and in all due to blinding
- g. One CBA looked at an older less deprived population over three months, while the other two included a more deprived younger population over eight to nine months
- h. One study looked at a two year intervention in over 75s which would not be typical of link worker interventions. The other study looked at a less deprived population than usually targeted for link worker interventions
- i. One study did not provide confidence intervals and the other had a small sample size.
- j. The CBA looked at a less deprived population than usually targeted for link worker interventions.
- k. One study looked at participants aged over 75 with an intervention duration of 2 years, whereas the other was in a younger, less deprived population and intervention was 4 months.
- l. Studies used different measures, one being a subscale of the WONCA/COOP Functional Health questionnaire. One RCT had a small sample size of 152.
- m. There were baseline differences between the intervention and control groups. There was a significant loss to follow up of almost 70%.
- n. Studies used slightly different measures and had different findings
- o. One study looked at a two year intervention and another at a one month intervention. Populations differed with one being adults over 75, older than the typical social prescribing population targeted and the other less deprived.



1  
2  
3  
4  
5  
6  
7  
8  
9  
10  
11  
12  
13  
14  
15  
16  
17  
18  
19  
20  
21  
22  
23  
24  
25  
26  
27  
28  
29  
30  
31  
32  
33  
34  
35  
36  
37  
38  
39  
40  
41  
42  
43  
44  
45  
46  
47

- p. One study did not report any confidence interval so cannot assess imprecision
- q. One CBA had baseline differences between the intervention and control group and significant loss to follow up of almost 70%.
- r. Studies used different measures and had slightly different results.
- s. One study did not provide confidence intervals so imprecision could not be assessed.
- t. The two RCTs were conducted in a single healthcare setting and may not transfer to other settings. The intervention was also longer and more intense than other social prescribing interventions.
- u. Neither study found a statistically significant reductions in hospitalisations or days in hospital but there was a trend towards significance.
- v. One RCT looked at a two year intervention for the over 75s. The other looked at a younger less deprived population than usually targeted for social prescribing interventions.
- w. Neither RCT reported confidence intervals or results of statistical analysis making it difficult to comment.
- x. The CBA had baseline imbalances between groups and almost 70% loss to follow up
- y. The baseline attendance rates between the two groups were very different and findings likely reflect regression to the mean.

| Study ID             | Primary Outcomes: Results                                                                                                                                                                                                                         | Secondary Outcomes: Results                                                                                                                                                                                                                                                                                                                                                                                                                                                                                                                                                                                                                                                                                                                                                                                                                                                                                                                           |
|----------------------|---------------------------------------------------------------------------------------------------------------------------------------------------------------------------------------------------------------------------------------------------|-------------------------------------------------------------------------------------------------------------------------------------------------------------------------------------------------------------------------------------------------------------------------------------------------------------------------------------------------------------------------------------------------------------------------------------------------------------------------------------------------------------------------------------------------------------------------------------------------------------------------------------------------------------------------------------------------------------------------------------------------------------------------------------------------------------------------------------------------------------------------------------------------------------------------------------------------------|
| Clarke et al, RCT 19 | Survival (% at 3.5 years) 73% in Intervention vs. 78% in control. Reported as non-significant.                                                                                                                                                    | Activities of daily living, loneliness (Wenger scale), morale (Geriatric Morale Scale), social contact score (Tunstall): no significant changes at 2 years. Information orientation score: not reported. Self-perceived health (% improved): 20% Intervention, 11% Control - reported as significant. HCU: 17% and 12% of both groups had seen GP and PHN respectively in previous month - reported as non-significant.                                                                                                                                                                                                                                                                                                                                                                                                                                                                                                                               |
| Grant et al          | Mental Health: Anxiety (HADS-A) -1.9 (-3.0 to -0.7) <sup>a</sup> p=0.002, Depression (HADS-D) -0.9 (-1.9 to 0.2) p=0.116. Social Support (Dukes Social Support Scale): Confidant -0.9 (-2.4 to 0.6) p=0.221, Affective -0.3 (-1.2 to 0.7) p=0.594 | Quality of life (delighted terrible faces scale): -0.5 (-0.9 to -0.1) p=0.006. Functional health (COOP/WONCA functional health assessment scale): Pain -0.5 (-0.8 to -0.1), Physical fitness -0.3 (-0.6 to 0.05) p=0.98, Feelings -0.5, (-0.8 to -0.2), Daily Activities -0.5 (-0.6 to -0.2) p=0.001, Social Activities -0.3 (-0.6 to 0.1) p=0.196, Change in health -0.3 (-0.6 to -0.03) p=0.03, Overall Health -0.4 (-0.7 to -0.1) p=0.003. HCU: both groups had similar contacts with the PCT, but the intervention group were reported as having more prescriptions, including mental health prescriptions and fewer referrals to general and mental health services, although no statistical analysis was performed.                                                                                                                                                                                                                             |
| Kangovi et al, 2018  | Health Related Quality of Life (HRQoL), Physical Health Component (SF-12-V2 PCS) -0.7 (-2.2 to 0.7) <sup>b</sup> p=0.3                                                                                                                            | HRQoL Mental Health Component (SF-12-V2 MCS) 0.8 (-1.1 to 2.6) <sup>b</sup> p=0.3. Patient Activation (PAM score): 1.9 (-0.1 to 3.8) p=0.06. Chronic disease control: HBA1c -0.2 (-1.3 to 0.9), BMI -0.2 (-0.7 to 0.4), CPD -0.5 (-2.2 to 1.2), SBP -6.3 (-14.3 to 1.8). Patient reported quality of primary care: Intervention group were more likely to report highest rating for quality comprehensive care and supportiveness for self-management - risk difference 0.12 p<0.001. HCU: Intervention group had fewer repeat admissions -0.24 (-0.40 to -0.07) p=0.02 and 30d readmissions -0.17 (-0.32 to -0.02) p=0.04, fewer total hospital days (300 vs 471) and statistically non significant fewer total hospitalisations -0.3 (-0.6 to 0.0) p=0.07 and shorter length of stay -3.1 (-6.3 to 0.2) p=0.06.                                                                                                                                     |
| Kangovi et al, 2017  | Change in chronic disease control: HBA1C -0.2 (-1.3 to 0.9) <sup>c</sup> , BMI -0.2 (-0.7 to 0.4), CPD -0.5 (-2.2 to 1.2), SBP -6.3 (-14.3 to 1.8) p=0.08                                                                                         | Achievement of chronic disease management goals (% achieved) 18.3% vs 17.2% p=0.81. HRQoL Physical Health Component (change in SF-12-V2 PCS): 0.9 vs 0.5 p=0.67 and HRQoL Mental Health Component (change in SF-12-V2 MCS) 2.3 vs -0.2 p=0.008. Patient activation (change in PAM) 2.2 vs 1.5 p=0.66. Proportion of people reporting high quality of patient centred care that was comprehensive (49.2% vs 39.7% p=0.01) and supportive of disease management (62.9% vs 38% p=0.001). HCU: Intervention group had a total of 68 hospitalisations with 278 hospital days vs 98 hospitalisations and 414 hospital days in the control p=0.17.                                                                                                                                                                                                                                                                                                           |
| Carnes et al         | Not specified                                                                                                                                                                                                                                     | Self rated health (scale 1 to 5): 0.127 (-0.221 to 0.9475) <sup>d</sup> . Mental health, anxiety (HADS-A): -0.119 (-0.847 to 1.609). Mental health, depression (HADS-D): 0.857 (-0.737 to 2.451) Wellbeing (Scale of 0-6 in last week): -0.013 (-0.623 to 0.596). Positive and active engagement in life (HeiQ Scale 0-20): -0.073 (-1.278 to 1.131). Number of regular activities (range 0-6): -0.897 (-1.729 to -0.065) p=0.035. HCU: A&E visits in the previous 3 months (mean (SD): Intervention 0.3 (0.68), Control 0.5 (1.15), but no baseline rate reported for the intervention group. Annual GP consultation rate before referral decreased in the intervention group and slightly increased in the control group, but there were significant baseline differences- Intervention 8.3 to 7.3, p=0.001, Control 2.9 to 3.3 p=0.014 and p<0.001 for between group differences at baseline and follow up. The intervention group were prescribed |

|                                                                                                                                                                                                                                                                                                                                                                                                                                                                                                                                                                                                                                                                                                                                                                                                                                                                                                                                                                                                                                                                                                                                                                                                                                                                                                                                                                                                                                                                                                                                                                                                                                                                                                                                                                                                                                                                                                                                                                                                                                                                                                                                                                                                                                                                                                                                                                                                                                                                                                                                                                        |                                                                                                  |                                                                                                                                                                                                                                                                                                                                                                                                                                                                                                                                                                                                                                                                          |
|------------------------------------------------------------------------------------------------------------------------------------------------------------------------------------------------------------------------------------------------------------------------------------------------------------------------------------------------------------------------------------------------------------------------------------------------------------------------------------------------------------------------------------------------------------------------------------------------------------------------------------------------------------------------------------------------------------------------------------------------------------------------------------------------------------------------------------------------------------------------------------------------------------------------------------------------------------------------------------------------------------------------------------------------------------------------------------------------------------------------------------------------------------------------------------------------------------------------------------------------------------------------------------------------------------------------------------------------------------------------------------------------------------------------------------------------------------------------------------------------------------------------------------------------------------------------------------------------------------------------------------------------------------------------------------------------------------------------------------------------------------------------------------------------------------------------------------------------------------------------------------------------------------------------------------------------------------------------------------------------------------------------------------------------------------------------------------------------------------------------------------------------------------------------------------------------------------------------------------------------------------------------------------------------------------------------------------------------------------------------------------------------------------------------------------------------------------------------------------------------------------------------------------------------------------------------|--------------------------------------------------------------------------------------------------|--------------------------------------------------------------------------------------------------------------------------------------------------------------------------------------------------------------------------------------------------------------------------------------------------------------------------------------------------------------------------------------------------------------------------------------------------------------------------------------------------------------------------------------------------------------------------------------------------------------------------------------------------------------------------|
|                                                                                                                                                                                                                                                                                                                                                                                                                                                                                                                                                                                                                                                                                                                                                                                                                                                                                                                                                                                                                                                                                                                                                                                                                                                                                                                                                                                                                                                                                                                                                                                                                                                                                                                                                                                                                                                                                                                                                                                                                                                                                                                                                                                                                                                                                                                                                                                                                                                                                                                                                                        |                                                                                                  | significantly more medications at baseline and follow up than control p <0.001.                                                                                                                                                                                                                                                                                                                                                                                                                                                                                                                                                                                          |
| Dickens et al                                                                                                                                                                                                                                                                                                                                                                                                                                                                                                                                                                                                                                                                                                                                                                                                                                                                                                                                                                                                                                                                                                                                                                                                                                                                                                                                                                                                                                                                                                                                                                                                                                                                                                                                                                                                                                                                                                                                                                                                                                                                                                                                                                                                                                                                                                                                                                                                                                                                                                                                                          | Health Related Quality of Life, Mental Health Component (SF-12 MCS) 0.1 (-1.9, 2.1) <sup>e</sup> | HRQoL Physical Health Component (SF-12 PCS): 0.1 (-1.9 to 2.10) p=0.9. HRQoL (EQ-5D-3L): -0.09 (-0.14 to -0.03) p<0.001. Depression (GDS): 0.2 (-0.2 to 0.7) p=0.29. Social Support (MOS-6): 0.03 (-0.2 to 0.2) p=0.75. Social Activities: No significant differences were reported between groups for number of friends/family, club/group membership or frequency of get together with friends/family. The intervention group were less likely to report getting along with others (OR 0.6 (0.4 to 0.9) p<0.01). Social Participation (General Household Survey items on housework, transport, childcare, advice, emotional support) was not different between groups. |
| Mercer et al                                                                                                                                                                                                                                                                                                                                                                                                                                                                                                                                                                                                                                                                                                                                                                                                                                                                                                                                                                                                                                                                                                                                                                                                                                                                                                                                                                                                                                                                                                                                                                                                                                                                                                                                                                                                                                                                                                                                                                                                                                                                                                                                                                                                                                                                                                                                                                                                                                                                                                                                                           | Health Related Quality of Life (EQ-5D-5L) 0.008 (-0.028 to 0.045) <sup>f</sup>                   | Well-being (ICECAP-A): -0.011 (-0.039 to 0.016) p=0.411. Mental health, anxiety (HADS-A): -0.41 (-0.99 to 0.18) p=0.172. Mental health, depression (HADS-D): 0.09 (-0.49 to 0.68) p=0.753. Work and social adjustment scale: 0.05 (-1.37 to 1.48) p=0.940. Self-reported lifestyle activities (smoking, alcohol, exercise): no difference between groups.                                                                                                                                                                                                                                                                                                                |
| <p><sup>a</sup> Mean Difference (95% CI) adjusted for baseline results. <sup>b</sup> Longitudinal estimated difference in difference (95% CI) from 6 to 9 months adjusted for site and chronic disease. <sup>c</sup> Difference in difference (95% CI) controlled for baseline results and any imbalanced baseline variables <sup>d</sup> Mean difference (95% CI) adjusted for age, sex, ethnicity, employment status and living arrangement. <sup>e</sup> Mean difference (95% CI) adjusted for employment status, accommodation type and living circumstances. <sup>f</sup> Mean difference (95% CI) adjusted for age, sex, SIMD, comorbidity, and significant baseline outcome measures as covariates and includes practice identifier as a random effects term.</p> <p>SF-12V2= Short Form Health Survey, is often used as a health related quality of life measure, with Physical (PCS) and Mental (MCS) health components reported separately on a scale of 0-100 with 100 representing maximal health. EQ-5D-5L=a standardized measure of self-reported health-related quality of life that assesses 5 dimensions at 5 levels of severity where 1 is the preferred state of health. EQ-5D-3L=an earlier version of EQ-5D-5L with 3 levels. GDS =Geriatric Depression Scale, a screening tool for depression in older people with a score of 4 or more indicating possible depression. HADS = Hospital Anxiety and Depression Scale measured on a scale of 0-42 where a higher score indicates worse mental health. HADS-A=Hospital Anxiety and Depression Scale, Anxiety, where a score above 10 indicates possible caseness; HADS-D=Hospital Anxiety and Depression Scale, Depression, where a score above 10 indicates possible caseness. Duke UNC Functional Social support scale measures an individual's social network, a higher score indicates stronger supports. MOS-6 Social support (six items from the Medical Outcomes Study Social Support Survey [MOS-SSS] where a higher score on scale of 1-6 indicates more support. ICECAPA= Investigating Choice Experiments for the Preferences of Older People Capability Measure for Adults, a capability based wellbeing measure for adults where 0 is no capability and 1 is full capability; WASAS = Work and Social Adjustment Scale that measures impact of mental health problems on daily life with higher scores denoting a greater impact.</p> <p>BMI=body mass index, CPD= cigarettes per day, SBP=systolic blood pressure, HbA1C=glycosylated haemoglobin, decrease denotes improvement.</p> |                                                                                                  |                                                                                                                                                                                                                                                                                                                                                                                                                                                                                                                                                                                                                                                                          |

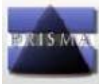

## PRISMA 2020 Checklist

| Section and Topic             | Item # | Checklist item                                                                                                                                                                                                                                                                                       | Location where item is reported |
|-------------------------------|--------|------------------------------------------------------------------------------------------------------------------------------------------------------------------------------------------------------------------------------------------------------------------------------------------------------|---------------------------------|
| <b>TITLE</b>                  |        |                                                                                                                                                                                                                                                                                                      |                                 |
| Title                         | 1      | Identify the report as a systematic review.                                                                                                                                                                                                                                                          | Page 1                          |
| <b>ABSTRACT</b>               |        |                                                                                                                                                                                                                                                                                                      |                                 |
| Abstract                      | 2      | See the PRISMA 2020 for Abstracts checklist.                                                                                                                                                                                                                                                         | Page 3                          |
| <b>INTRODUCTION</b>           |        |                                                                                                                                                                                                                                                                                                      |                                 |
| Rationale                     | 3      | Describe the rationale for the review in the context of existing knowledge.                                                                                                                                                                                                                          | Page 5                          |
| Objectives                    | 4      | Provide an explicit statement of the objective(s) or question(s) the review addresses.                                                                                                                                                                                                               | Page 6                          |
| <b>METHODS</b>                |        |                                                                                                                                                                                                                                                                                                      |                                 |
| Eligibility criteria          | 5      | Specify the inclusion and exclusion criteria for the review and how studies were grouped for the syntheses.                                                                                                                                                                                          | Page 6                          |
| Information sources           | 6      | Specify all databases, registers, websites, organisations, reference lists and other sources searched or consulted to identify studies. Specify the date when each source was last searched or consulted.                                                                                            | Page 9                          |
| Search strategy               | 7      | Present the full search strategies for all databases, registers and websites, including any filters and limits used.                                                                                                                                                                                 | Page 9                          |
| Selection process             | 8      | Specify the methods used to decide whether a study met the inclusion criteria of the review, including how many reviewers screened each record and each report retrieved, whether they worked independently, and if applicable, details of automation tools used in the process.                     | Page 10                         |
| Data collection process       | 9      | Specify the methods used to collect data from reports, including how many reviewers collected data from each report, whether they worked independently, any processes for obtaining or confirming data from study investigators, and if applicable, details of automation tools used in the process. | Page 10                         |
| Data items                    | 10a    | List and define all outcomes for which data were sought. Specify whether all results that were compatible with each outcome domain in each study were sought (e.g. for all measures, time points, analyses), and if not, the methods used to decide which results to collect.                        | Page 8                          |
|                               | 10b    | List and define all other variables for which data were sought (e.g. participant and intervention characteristics, funding sources). Describe any assumptions made about any missing or unclear information.                                                                                         | Page 10                         |
| Study risk of bias assessment | 11     | Specify the methods used to assess risk of bias in the included studies, including details of the tool(s) used, how many reviewers assessed each study and whether they worked independently, and if applicable, details of automation tools used in the process.                                    | Page 10                         |
| Effect measures               | 12     | Specify for each outcome the effect measure(s) (e.g. risk ratio, mean difference) used in the synthesis or presentation of results.                                                                                                                                                                  | Page 20                         |
| Synthesis methods             | 13a    | Describe the processes used to decide which studies were eligible for each synthesis (e.g. tabulating the study intervention characteristics and comparing against the planned groups for each synthesis (item #5)).                                                                                 | Page 10                         |
|                               | 13b    | Describe any methods required to prepare the data for presentation or synthesis, such as handling of missing summary statistics, or data conversions.                                                                                                                                                | N/A                             |
|                               | 13c    | Describe any methods used to tabulate or visually display results of individual studies and syntheses.                                                                                                                                                                                               | Page 10                         |
|                               | 13d    | Describe any methods used to synthesize results and provide a rationale for the choice(s). If meta-analysis was performed, describe the model(s), method(s) to identify the presence and extent of statistical heterogeneity, and software package(s) used.                                          | Page 10                         |
|                               | 13e    | Describe any methods used to explore possible causes of heterogeneity among study results (e.g. subgroup analysis, meta-regression).                                                                                                                                                                 | N/A                             |
|                               | 13f    | Describe any sensitivity analyses conducted to assess robustness of the synthesized results.                                                                                                                                                                                                         | N/A                             |
| Reporting bias                | 14     | Describe any methods used to assess risk of bias due to missing results in a synthesis (arising from reporting biases).                                                                                                                                                                              | Page 10                         |

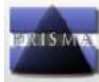

## PRISMA 2020 Checklist

| Section and Topic             | Item # | Checklist item                                                                                                                                                                                                                                                                       | Location where item is reported                       |
|-------------------------------|--------|--------------------------------------------------------------------------------------------------------------------------------------------------------------------------------------------------------------------------------------------------------------------------------------|-------------------------------------------------------|
| assessment                    |        |                                                                                                                                                                                                                                                                                      |                                                       |
| Certainty assessment          | 15     | Describe any methods used to assess certainty (or confidence) in the body of evidence for an outcome.                                                                                                                                                                                | Page 10                                               |
| <b>RESULTS</b>                |        |                                                                                                                                                                                                                                                                                      |                                                       |
| Study selection               | 16a    | Describe the results of the search and selection process, from the number of records identified in the search to the number of studies included in the review, ideally using a flow diagram.                                                                                         | Page 11                                               |
|                               | 16b    | Cite studies that might appear to meet the inclusion criteria, but which were excluded, and explain why they were excluded.                                                                                                                                                          | Page 25                                               |
| Study characteristics         | 17     | Cite each included study and present its characteristics.                                                                                                                                                                                                                            | Page 15                                               |
| Risk of bias in studies       | 18     | Present assessments of risk of bias for each included study.                                                                                                                                                                                                                         | Page 17 and extended data                             |
| Results of individual studies | 19     | For all outcomes, present, for each study: (a) summary statistics for each group (where appropriate) and (b) an effect estimate and its precision (e.g. confidence/credible interval), ideally using structured tables or plots.                                                     | Table 3, Page 20 and see extended data                |
| Results of syntheses          | 20a    | For each synthesis, briefly summarise the characteristics and risk of bias among contributing studies.                                                                                                                                                                               | Page 18, Summary of findings table                    |
|                               | 20b    | Present results of all statistical syntheses conducted. If meta-analysis was done, present for each the summary estimate and its precision (e.g. confidence/credible interval) and measures of statistical heterogeneity. If comparing groups, describe the direction of the effect. | N/A                                                   |
|                               | 20c    | Present results of all investigations of possible causes of heterogeneity among study results.                                                                                                                                                                                       | N/A                                                   |
|                               | 20d    | Present results of all sensitivity analyses conducted to assess the robustness of the synthesized results.                                                                                                                                                                           | N/A                                                   |
| Reporting biases              | 21     | Present assessments of risk of bias due to missing results (arising from reporting biases) for each synthesis assessed.                                                                                                                                                              | Page 18                                               |
| Certainty of evidence         | 22     | Present assessments of certainty (or confidence) in the body of evidence for each outcome assessed.                                                                                                                                                                                  | Page 18 and see extended data GRADE assessment tables |
| <b>DISCUSSION</b>             |        |                                                                                                                                                                                                                                                                                      |                                                       |
| Discussion                    | 23a    | Provide a general interpretation of the results in the context of other evidence.                                                                                                                                                                                                    | Page 23                                               |
|                               | 23b    | Discuss any limitations of the evidence included in the review.                                                                                                                                                                                                                      | Page 25                                               |

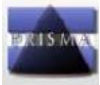

## PRISMA 2020 Checklist

| Section and Topic                              | Item # | Checklist item                                                                                                                                                                                                                             | Location where item is reported |
|------------------------------------------------|--------|--------------------------------------------------------------------------------------------------------------------------------------------------------------------------------------------------------------------------------------------|---------------------------------|
|                                                | 23c    | Discuss any limitations of the review processes used.                                                                                                                                                                                      | Page 25                         |
|                                                | 23d    | Discuss implications of the results for practice, policy, and future research.                                                                                                                                                             | Page 26                         |
| <b>OTHER INFORMATION</b>                       |        |                                                                                                                                                                                                                                            |                                 |
| Registration and protocol                      | 24a    | Provide registration information for the review, including register name and registration number, or state that the review was not registered.                                                                                             | Page 3                          |
|                                                | 24b    | Indicate where the review protocol can be accessed, or state that a protocol was not prepared.                                                                                                                                             | Page 25                         |
|                                                | 24c    | Describe and explain any amendments to information provided at registration or in the protocol.                                                                                                                                            | N/A                             |
| Support                                        | 25     | Describe sources of financial or non-financial support for the review, and the role of the funders or sponsors in the review.                                                                                                              |                                 |
| Competing interests                            | 26     | Declare any competing interests of review authors.                                                                                                                                                                                         |                                 |
| Availability of data, code and other materials | 27     | Report which of the following are publicly available and where they can be found: template data collection forms; data extracted from included studies; data used for all analyses; analytic code; any other materials used in the review. |                                 |

From: Page MJ, McKenzie JE, Bossuyt PM, Boutron I, Hoffmann TC, Mulrow CD, et al. The PRISMA 2020 statement: an updated guideline for reporting systematic reviews. *BMJ* 2021;372:n71. doi: 10.1136/bmj.n71

For more information, visit: <http://www.prisma-statement.org/>

# BMJ Open

## Effect of social prescribing link workers on health outcomes and costs for adults in primary care and community settings: a systematic review

|                                 |                                                                                                                                                                                                                                                                                                                                                                                                                                                                                                                                                                                                                                                                                                                                     |
|---------------------------------|-------------------------------------------------------------------------------------------------------------------------------------------------------------------------------------------------------------------------------------------------------------------------------------------------------------------------------------------------------------------------------------------------------------------------------------------------------------------------------------------------------------------------------------------------------------------------------------------------------------------------------------------------------------------------------------------------------------------------------------|
| Journal:                        | <i>BMJ Open</i>                                                                                                                                                                                                                                                                                                                                                                                                                                                                                                                                                                                                                                                                                                                     |
| Manuscript ID                   | bmjopen-2022-062951.R1                                                                                                                                                                                                                                                                                                                                                                                                                                                                                                                                                                                                                                                                                                              |
| Article Type:                   | Original research                                                                                                                                                                                                                                                                                                                                                                                                                                                                                                                                                                                                                                                                                                                   |
| Date Submitted by the Author:   | 03-Aug-2022                                                                                                                                                                                                                                                                                                                                                                                                                                                                                                                                                                                                                                                                                                                         |
| Complete List of Authors:       | Kiely, Bridget; Royal College of Surgeons in Ireland, Department of General Practice<br>Croke, Aisling; Royal College of Surgeons in Ireland, Department of General Practice<br>O'Shea, Muireann; Royal College of Surgeons in Ireland, Department of General Practice<br>Boland, Fiona; Royal College of Surgeons in Ireland, HRB Centre For Primary Care Research, Division of Population Health Sciences (PHS)<br>O'Shea, Eamon; National University of Ireland Galway, School of Business and Economics<br>Connolly, Deirdre; Trinity College, Occupational Therapy<br>Smith, Susan; Trinity College Dublin, Discipline of Public Health and Primary Care; Royal College of Surgeons in Ireland, Department of General Practice |
| <b>Primary Subject Heading</b>: | General practice / Family practice                                                                                                                                                                                                                                                                                                                                                                                                                                                                                                                                                                                                                                                                                                  |
| Secondary Subject Heading:      | Evidence based practice, Health services research                                                                                                                                                                                                                                                                                                                                                                                                                                                                                                                                                                                                                                                                                   |
| Keywords:                       | SOCIAL MEDICINE, PRIMARY CARE, Health policy < HEALTH SERVICES ADMINISTRATION & MANAGEMENT                                                                                                                                                                                                                                                                                                                                                                                                                                                                                                                                                                                                                                          |
|                                 |                                                                                                                                                                                                                                                                                                                                                                                                                                                                                                                                                                                                                                                                                                                                     |

SCHOLARONE™  
Manuscripts



I, the Submitting Author has the right to grant and does grant on behalf of all authors of the Work (as defined in the below author licence), an exclusive licence and/or a non-exclusive licence for contributions from authors who are: i) UK Crown employees; ii) where BMJ has agreed a CC-BY licence shall apply, and/or iii) in accordance with the terms applicable for US Federal Government officers or employees acting as part of their official duties; on a worldwide, perpetual, irrevocable, royalty-free basis to BMJ Publishing Group Ltd ("BMJ") its licensees and where the relevant Journal is co-owned by BMJ to the co-owners of the Journal, to publish the Work in this journal and any other BMJ products and to exploit all rights, as set out in our [licence](#).

The Submitting Author accepts and understands that any supply made under these terms is made by BMJ to the Submitting Author unless you are acting as an employee on behalf of your employer or a postgraduate student of an affiliated institution which is paying any applicable article publishing charge ("APC") for Open Access articles. Where the Submitting Author wishes to make the Work available on an Open Access basis (and intends to pay the relevant APC), the terms of reuse of such Open Access shall be governed by a Creative Commons licence – details of these licences and which [Creative Commons](#) licence will apply to this Work are set out in our licence referred to above.

Other than as permitted in any relevant BMJ Author's Self Archiving Policies, I confirm this Work has not been accepted for publication elsewhere, is not being considered for publication elsewhere and does not duplicate material already published. I confirm all authors consent to publication of this Work and authorise the granting of this licence.



1  
2  
3 **Effect of social prescribing link workers on health outcomes and costs for adults in**  
4 **primary care and community settings: a systematic review**  
5  
6  
7  
8  
9

10  
11 **AUTHORS**  
12

13  
14 Bridget Kiely<sup>1</sup> URI: <https://orcid.org/0000-0002-5752-0432>  
15

16  
17 Aisling Croke<sup>1</sup> URI: <https://orcid.org/0000-0002-2674-7474>  
18

19  
20 Muireann O'Shea<sup>1</sup>  
21

22  
23 Fiona Boland<sup>2</sup> URI: <https://orcid.org/0000-0003-3228-0046>  
24

25  
26 Eamon O'Shea<sup>3</sup> URI: <https://orcid.org/0000-0002-5521-5987>  
27

28  
29 Deirdre Connolly<sup>4</sup> URI: <https://orcid.org/0000-0001-8539-8123>  
30

31  
32 Susan M. Smith<sup>5</sup> URI: <https://orcid.org/0000-0001-6027-2727>  
33  
34  
35  
36  
37

38 **AFFILIATIONS**  
39

40  
41 <sup>1</sup> Department of General Practice, RCSI University of Medicine and Health, Dublin, Ireland  
42

43  
44 <sup>2</sup> Data Science Centre, RCSI University of Medicine and Health Sciences, Dublin, Ireland  
45

46  
47 <sup>3</sup> Centre for Economic and Social Research on Dementia, National University of Ireland,  
48 Galway, Galway, Ireland  
49

50  
51 <sup>4</sup> Discipline of Occupational Therapy, Trinity College, Dublin, Ireland  
52

53  
54 <sup>5</sup> Discipline of Public Health and Primary Care, Trinity College, Dublin, Ireland  
55  
56  
57  
58  
59  
60

1  
2  
3 **Correspondence to:**  
4

5  
6 Dr Bridget Kiely, Department of General Practice, RCSI University of Medicine and Health,  
7  
8 122 St Stephens Green, Dublin 2, Ireland  
9

10  
11 bridgetkiely@rcsi.com  
12  
13

14  
15  
16  
17 Word count: 6,200  
18  
19  
20  
21  
22  
23  
24  
25  
26  
27  
28  
29  
30  
31  
32  
33  
34  
35  
36  
37  
38  
39  
40  
41  
42  
43  
44  
45  
46  
47  
48  
49  
50  
51  
52  
53  
54  
55  
56  
57  
58  
59  
60

For peer review only

## ABSTRACT

**Objectives:** To establish the evidence base for the effects on health outcomes and costs of social prescribing link workers (non-health or social care professionals who connect people to community resources) for people in community settings focusing on people experiencing multimorbidity and social deprivation.

**Design:** Systematic review and narrative synthesis using the Grading of Recommendations Assessment, Development, and Evaluation (GRADE) approach.

**Data sources:** Cochrane database, Cochrane Central Register of Controlled Trials, ClinicalTrials.gov, EU Clinical Trials Register, CINAHL, Embase, Global Health, PubMed/MEDLINE, PsycInfo, LILACS, Web of Science, and grey literature were searched up to 31<sup>st</sup> July 2021. A forward citation search was completed on 9<sup>th</sup> June 2022.

**Eligibility criteria:** Controlled trials meeting the Cochrane Effectiveness of Practice and Organisation of Care (EPOC) guidance on eligible study designs assessing the effect of social prescribing link workers for adults in community settings on any outcomes. No language restrictions were applied.

**Data extraction and synthesis:** Two independent reviewers extracted data, evaluated study quality using the Cochrane EPOC risk of bias tool and judged certainty of the evidence. Results were synthesised narratively.

**Results:** Eight studies (n=6,500 participants), with five randomised controlled trials at low risk of bias and three controlled before-after studies at high risk of bias, were included. Four included participants experiencing multimorbidity and social deprivation. Four (n=2186) reported no impact on HRQoL. Four (n=1924) reported mental health outcomes with three reporting no impact. Two US studies found improved ratings of high-quality care and

1  
2  
3 reduced hospitalisations for people with multimorbidity experiencing deprivation. No cost  
4 effectiveness analyses were identified. The certainty of the evidence was low or very low.  
5  
6  
7

8 **Conclusion:** There is an absence of evidence for social prescribing link workers. Policy  
9 makers should note this and support evaluation of current programmes before mainstreaming.  
10  
11  
12

13  
14 **PROSPERO registration number:** CRD42019134737.  
15  
16

## 17 18 19 20 **STRENGTHS AND LIMITATIONS OF THIS STUDY** 21

- 22  
23 • This systematic review only included randomised trials and controlled before-after  
24 studies that met the Cochrane Effectiveness of Practice and Organisation of Care  
25 guidance, to avoid potentially biased results from poorer quality studies.  
26  
27
- 28 • Our literature search involved an in-depth search for social prescribing link worker  
29 interventions, using a wide range of search terms and with no language, country or  
30 date limitations.  
31  
32
- 33 • The area of social prescribing is a rapidly evolving field, and we conducted a forward  
34 citation search of included papers to capture any relevant studies published after our  
35 search.  
36  
37
- 38 • Our broad search resulted in a large number of studies and an initial screen of clearly  
39 ineligible studies was conducted by one author only, which may have introduced bias.  
40  
41
- 42 • The limited number of studies and heterogeneity in study design and intervention  
43 meant a meta-analysis was not possible and thus a robust narrative synthesis including  
44 an assessment of the certainty of the evidence was conducted.  
45  
46  
47  
48  
49  
50  
51  
52  
53  
54  
55  
56  
57  
58  
59  
60

## INTRODUCTION

Social prescribing is a way of linking people with complex needs to non-medical supports in the community. There are different models of social prescribing, ranging from online signposting services to individual support from a link worker to access community resource.

The link worker model of social prescribing is most frequently used in the UK.(1) Link workers are non-health or social care professionals, usually based in primary care or community organisations, who determine the health and well-being needs of people referred to them (usually by health care professionals), co-produce a health and well-being plan and provide support to connect with community resources to meet these needs. No qualifications are specified for link workers, rather there is a focus on relevant experience and skills, such as listening and empathising, to perform the role.(2) Many health systems are developing social prescribing initiatives and NHS England is funding link workers in primary care and recommends their use for people who have one or more chronic conditions, need support with their mental health, are isolated or who have complex social problems.(3)

People experiencing multimorbidity (defined as two or more chronic health conditions) experience fragmented care, poorer health outcomes and more psychological stress and as multimorbidity becomes the norm among an aging population, it poses a significant challenge to health systems.(4) People with complex multimorbidity account for a higher proportion of hospital admissions and therefore costs, and have higher consultation rates than those without.(5) In socially deprived areas, the impact is greater as people experience earlier onset of multimorbidity and are more likely to have mental health comorbidities.(6) A 2021 systematic review of interventions targeting people with multimorbidity in primary care identified 16 RCTs but found limited evidence for interventions that improve outcomes

1  
2  
3 including HRQoL and mental health outcomes.(7) The review did not identify any eligible  
4  
5 social prescribing link worker interventions but concluded that existing evidence suggests  
6  
7 that future research should target a range of areas including patient health behaviours that can  
8  
9 be addressed through social prescribing.  
10  
11

12  
13 Social prescribing link workers may have an impact on health outcomes for people  
14  
15 experiencing multimorbidity, particularly in areas of social deprivation, but despite their  
16  
17 widespread roll out in the U.K., there is limited evidence for their effectiveness.(8) If  
18  
19 effective, social prescribing link workers should reduce health care costs, by addressing the  
20  
21 social problems that reportedly drive 20% of primary care attendances and the social  
22  
23 determinants of health that lead to poorer outcomes.(9) A recent systematic review, however,  
24  
25 concluded that there was a lack of evidence for how, for whom and when social prescribing  
26  
27 was effective or how much it cost.(10) Previous reviews have only looked at U.K. based  
28  
29 interventions and included a broad range of studies including those with uncontrolled  
30  
31 designs.(11, 12). Social prescribing is however gaining momentum internationally and while  
32  
33 interventions are adapted to the local context, there are similarities and potential to learn from  
34  
35 experiences in other countries. (13) We aimed to systematically review the evidence of  
36  
37 effectiveness and costs of social prescribing link worker interventions internationally and to  
38  
39 establish the evidence, if any, for their effectiveness in people with multimorbidity and social  
40  
41 deprivation.  
42  
43  
44  
45  
46  
47  
48

## 49 **METHODS**

50  
51  
52 We conducted a systematic review of studies reporting effectiveness and/or costs of social  
53  
54 prescribing link workers based in primary or community care settings for community  
55  
56 dwelling adults. We included randomised trials and non-randomised trials that met the  
57  
58 Cochrane Effectiveness of Practice and Organisation of Care (EPOC) guidance on eligible  
59  
60

1  
2  
3 study designs.(14) We followed the PRISMA statement for reporting systematic reviews,  
4  
5 (15) (Appendix 1, (16)), registered our review on Prospero CRD42019134737 (04/07/2019)  
6  
7 and published the protocol. (17)  
8  
9

## 10 **Eligibility criteria**

### 11 **Participants/population**

12  
13  
14  
15  
16  
17 We included studies on community dwelling adults attending primary care. Participants did  
18  
19 not need to have any specific index condition. We included all studies whether they focused  
20  
21 on participants in areas of social deprivation or not, but we specifically extracted data on  
22  
23 social deprivation and multimorbidity where it was reported. We excluded studies on children  
24  
25 and those in residential or supported care.  
26  
27  
28

### 29 **Intervention**

30  
31  
32  
33 Social prescribing link workers may be known by other terms such as community health  
34  
35 workers, patient navigators or health facilitators. While all of these work in the area of health,  
36  
37 they are generally considered “lay workers” as they have not completed formal professional  
38  
39 health or social care qualifications. Similarly, the process of social prescribing may be known  
40  
41 by other terms such as “community referral” or “navigation”. Inclusion was based on the  
42  
43 function of the role, i.e. supporting people to improve their health and wellbeing through  
44  
45 connecting them with community resources and health and social care coordination,  
46  
47 recognising that there is a wide range of terms used to describe such roles. (18)  
48  
49  
50  
51

52  
53 We included interventions that involved:  
54  
55  
56  
57  
58  
59  
60

- A referral (including self-referrals) to a link worker (a non-health or social care professional) who was based either in a primary care practice or a community or voluntary organisation.
- Participants meeting with a link worker face to face at least once, although additional contacts could be via telephone or other remote methods.
- Determining an individual range of health and social care supports and community resources that the person would be willing to engage with and being offered support and follow up to engage with their chosen supports and activities.

We excluded interventions without a link worker that only involved signposting to services, used volunteers as link workers or were delivered by telephone. Interventions where additional support was being provided by health care professionals or personal care provided alongside health and social care coordination such as disability support workers were excluded as it was not possible to separate the effects of the different components of care. We excluded multi-faceted interventions, which mainly comprised of education and goal setting around disease control or health behaviour change interventions, even if they had an element of social prescribing as it was not possible to separate the impact of the different components of the intervention.

#### Comparator(s)

We only included studies with a comparator group that did not involve any social prescribing and met the EPOC guidance on controlled before-after (CBA) studies, i.e. contemporaneous data collection, controls drawn from similar sites and at least 2 intervention and 2 control sites.(14)



## Setting

Primary care was generally defined as “care provided by clinicians that are available to treat all common conditions in all age groups and have an ongoing relationship with their patients”.(19) This definition allowed for a more flexible interpretation in countries that have different models of healthcare. We excluded studies that focused on hospital inpatients or specialist services or were emergency department based. The definition of social deprivation is debated. It varies from country to country and is usually based on relative socioeconomic capacity.(20) For this review, we did not have a definition of deprivation, rather we described how deprivation was defined in relevant studies.

## Outcomes

### *Main outcome*

We included all reported outcomes, but based on our interest in assessing link workers to support patient with multimorbidity, we focused on outcomes in the core outcome set for multimorbidity that recommends primary outcomes of quality of life, mental health and mortality for interventions focused on multimorbidity.(21)

The primary outcomes for the review were:

- Health related quality of life (HRQoL), as measured by a validated instrument.
- Mental health outcomes, as measured by a validated instrument for screening for mental health conditions.

### *Additional outcomes*

1  
2  
3 Secondary outcomes included also focused on the core outcome set for multimorbidity.(21)

4  
5 While this is a wide range of outcomes it is in keeping with the MRC frameworks' guide on  
6  
7 using multiple outcome measures for complex interventions.(22) These included:  
8  
9

- 10  
11
- 12 • Patient-reported outcomes on social-connectedness or isolation, self-rated health,  
13 patient experience of care, treatment burden, self-management behaviour and self-  
14 efficacy.  
15
  - 16 • Physical activity and function included measures of physical activity (self-reported or  
17 objectively measured), physical function, activities of daily living.  
18
  - 19 • Health service utilisation defined as number of GP visits, ED attendances or hospital  
20 admissions as measured via primary care or hospital records or self-reported.  
21
  - 22 • Any physical health data reported was included.  
23
  - 24 • Any cost data or social return on investment data.  
25  
26  
27  
28  
29  
30  
31

### 32 33 **Search strategy**

34  
35  
36 We searched 11 bibliographic and trials databases for randomised controlled trials and non-  
37 randomised controlled trials that meet the criteria outlined in the Cochrane Effective Practice  
38 and Organisation of Care (EPOC) guidance on study design(14) from inception up to July  
39 2021 with no language limits: Cochrane database, Cochrane Central Register of Controlled  
40 Trials, ClinicalTrials.gov, EU Clinical Trials Register, Cumulative Index of Nursing and  
41 Allied Health Literature (CINAHL), Embase, Global Health, PubMed/MEDLINE, PsycInfo,  
42 LILACS (Latin American and Caribbean Health Sciences Information database), and Web of  
43 Science. To identify economic evaluations that may be of relevance we also searched the  
44 NHS EED (NHS Economic Evaluation Database), Health Technology Assessment Database  
45 (both available via the Centre for Reviews and Dissemination (CRD), University of York)  
46 and CEA (Cost-Effectiveness Analysis Registry) up to July 2019. The search strategy  
47  
48  
49  
50  
51  
52  
53  
54  
55  
56  
57  
58  
59  
60

1  
2  
3 focused on the use of a range of key words associated with the intervention and was  
4  
5 developed with input from a senior information specialist.  
6  
7

8  
9 We conducted a grey literature search of the following databases: Irish Health Service  
10  
11 Executive (HSE) Lenus, RIAN, Open Grey, DART EUROPE, Google and Google Scholar  
12  
13 and WHOLIS (World Health Organization Library Information System) up to July 2021. We  
14  
15 also conducted a forward and backward citation search of included studies. Relevant websites  
16  
17 (The Kings Fund, NHS Social Prescribing, National Institute for Clinical Excellence, Social  
18  
19 Prescribing Network, Health Foundation, Nuffield Trust, HSE Social Prescribing, and Oxford  
20  
21 Social Prescribing Research Network) were searched manually for evaluations. The first 23  
22  
23 pages of a Google Search for “social prescribing” and the first 21 pages of a Google scholar  
24  
25 search were reviewed for additional literature. Please see supplementary data, Appendix 2 for  
26  
27 detailed search strategy. (16)  
28  
29  
30  
31  
32

### 33 **Data management**

34  
35  
36 Rayyan was used to sort abstracts for inclusion and exclusion. References were managed with  
37  
38 Endnote 8 reference manager. Excel was used to manage extracted data.  
39  
40  
41

### 42 **Review process**

43  
44  
45 Duplicates were removed using the EndNote function, which identifies potential duplicates,  
46  
47 which were then checked and manually reviewed by the lead author (BK). The lead author  
48  
49 (BK) then did an initial screen to remove clearly ineligible titles. This step was necessary due  
50  
51 to the large number of potentially eligible reports returned by our search strategy. Where it  
52  
53 was clear from the title that our eligibility criteria on population, intervention or methods  
54  
55 were not met the title was excluded. For example, a title clearly reporting a qualitative study  
56  
57 of a healthcare intervention delivered by lay people to children, such as a qualitative study of  
58  
59  
60

1  
2  
3 a community health worker intervention for childhood diarrhoea, would have been excluded.  
4  
5 Any report where it was not clear from the title if eligibility criteria were met was reviewed  
6  
7 by abstract by BK and AC, who independently reviewed the abstracts of all potentially  
8  
9 eligible titles, discarded those that clearly did not meet inclusion criteria and independently  
10  
11 reviewed the full texts of the remainder to assess eligibility for final inclusion. Any  
12  
13 discrepancies were resolved through discussion with a third reviewer (SMS). Data extraction  
14  
15 was completed by the lead author and checked by another author (MOS). Two authors (BK  
16  
17 and AC) independently assessed and cross-checked the risk of bias in all included studies  
18  
19 using the Cochrane EPOC Guidance for assessing risk of bias.(23) The certainty of the  
20  
21 evidence for outcomes was independently assessed by two authors (BK and MOS) using the  
22  
23 Grading of Recommendations Assessment, Development and Evaluation (GRADE) criteria  
24  
25 including risk of bias, consistency of effect, imprecision, indirectness and other potential  
26  
27 criteria such as publication bias.(24) Any discrepancies were discussed with the senior author  
28  
29 (SMS) until consensus was reached. RCTs and CBAs were assessed separately. Overall  
30  
31 certainty was based on assessment of evidence from RCTs where more than one was  
32  
33 available.  
34  
35  
36  
37  
38  
39  
40

### 41 **Strategy for data synthesis**

42  
43  
44

45 Due to the heterogeneity in terms of study design, risk of bias, participants, interventions and  
46  
47 outcomes, a narrative synthesis was performed and presented in tabular form to include the  
48  
49 following headings: study design, setting, participants, nature of intervention, outcome  
50  
51 measures used, effects and costs. We explored the possibility of completing meta-analysis,  
52  
53 however, in the two studies that were similar in terms of study design, intervention  
54  
55 characteristics and duration of follow up, there was insufficient data reported on the primary  
56  
57 outcomes. As there were only two studies, authors were not contacted for additional data. We  
58  
59  
60

1  
2  
3 had planned to complete sub-group analyses based on multimorbidity, living in areas of  
4 social deprivation and link worker location, but this was not possible due to substantial  
5 methodological heterogeneity, including study design and definitions and reporting of  
6 multimorbidity and deprivation.  
7  
8  
9  
10  
11  
12

### 13 **Public patient involvement**

14  
15  
16  
17 This review is part of one of four PhD projects under a Health Research Board collaborative  
18 doctoral award (CDA) in multimorbidity. The original CDA project application and PhD  
19 topics had input from a PPI advisory group. A multimorbidity PPI advisory group was set up  
20 specifically to support the four PhD projects in the CDA. The lead reviewer (BK) presented  
21 the results of this review to the group who provided input on implications for policy, practice  
22 and research, included in the discussion. See Appendix 3 Guidance on Reporting  
23 Involvement of Public and Patients (GRIPP) 2 form in supplementary data for further details  
24 on PPI methods. (16)  
25  
26  
27  
28  
29  
30  
31  
32  
33  
34  
35

### 36 **RESULTS**

37  
38  
39  
40 The database search identified 20,656 records after duplicate removal. 19,738 were removed  
41 after title screening leaving 918 abstracts for review. 553 full texts were assessed for  
42 eligibility including 216 identified from the database search and 397 from other sources.  
43  
44 Seven reports of six studies were identified from the database search, one from backward  
45 citation searches and one from forward citation searches. Our forward citation search did not  
46 identify any corrections or errata related to the included studies. (See Figure 1: PRISMA  
47 Flow diagram)  
48  
49  
50  
51  
52  
53  
54  
55  
56  
57  
58  
59  
60

### **Included studies and participants**

Nine papers reporting eight studies, including 6,500 participants were identified. Five were randomised trials (RCTs),(25-29) three controlled before-after studies (CBAs)(30-32) and one paper reported the economic evaluation of an included trial.(33) Three studies were from the US (27-29) and five from the UK.(25, 26, 30-32)

Participants were majority female ranging from 59% to 75% with only one study reporting majority male participants (62%).(30) Mean age ranged from 29 to 71 years age. One study focused on adults over 75, but did not report mean age.(25) Three of the seven studies clearly reported including participants experiencing multimorbidity and deprivation. Two of the US trials tested an intervention, (the IMPaCT intervention) that targeted people with two or more chronic conditions, living in a high poverty zip code.(27, 28) One U.K. study was based in GP practices located in postcodes with high deprivation and reported a mean of 3.1 self-reported chronic conditions.(31) Otherwise, studies recruited participants based on a combination of factors including: social isolation,(25, 30, 32) mental health problems,(30, 32) age (25, 30), frequent ED attendance, (29) and GP perception of suitability for the intervention.(26, 31, 32)

### **Interventions and comparators**

All interventions included referral to a link worker or equivalent, who identified a set of personalized goals and supported participants to achieve these through connecting with community resources. There was considerable variation in the duration and intensity of the link worker interventions. Intervention duration ranged from one month to two years, with most interventions ranging from three to nine months in duration. Intensity in terms of link worker caseload and number of contacts was only reported in detail in two of the seven

1  
2  
3 studies. The IMPaCT intervention evaluated in the two US trials was six months duration  
4 with weekly contacts as standard. Each link worker worked with 55 clients per year for an  
5 average of 38.4 hours suggesting an average of one hour per meeting.(34) No other studies  
6 reported on link worker caseload. Other interventions were less intense in terms of number of  
7 contacts. Carnes et al reported that 69% of participants met the link worker once and 17%  
8 had two or more contacts.(32) Grant et al reported a mean of 1.7 contacts and Mercer et al a  
9 mean of 3.1 contacts.(26, 31) The remaining two studies did not report on numbers of  
10 contacts.(25, 30) Resources referred to were tailored to the individual in all interventions with  
11 counselling services, social and craft groups, exercises classes, addiction supports, welfare  
12 and employment advice all mentioned as examples of resources. Only one study specifically  
13 reported on uptake of community resources with uptake of resources positively associated  
14 with number of link worker contacts and ranging from 36% of participants who had met once  
15 to 71% of participants who had met 4 times. (31)

16  
17 All link workers had professional supervision arrangements, which varied across studies.  
18 They were managed and employed by either a research team or a host voluntary community  
19 organisation. While efforts were made to standardise the IMPaCT intervention,(34) with  
20 regular supervision and reviews, the other interventions were very flexible, and fidelity was  
21 not assessed. In some cases, there was considerable variation in how the intervention was  
22 implemented across sites, but this was part of a general tailored approach.(30, 31) The setting  
23 also varied. In three studies, link workers were embedded within general practice or  
24 equivalent.(28, 31, 32) In two of these studies one link worker was assigned to a practice.  
25 (28, 31) In the other, three link workers were based across 22 practices.(32) The link workers  
26 were based in community settings in the remaining five studies.

The comparator was usual care for all studies, with the inclusion of chronic disease goal setting as a co-intervention in two of the RCTs.(27, 28) The five RCTs randomised participants at the level of the individual. The three CBAs studies recruited controls from nearby GP practices with similar demographics but reported significant differences in

| Table 1. Summary of characteristics of included studies |                                                                                                                                                                  |                                                                                                                                                                                                                                                                                                                                                                      |                                                                                                                                                                                                                                                                                                                                                                          |
|---------------------------------------------------------|------------------------------------------------------------------------------------------------------------------------------------------------------------------|----------------------------------------------------------------------------------------------------------------------------------------------------------------------------------------------------------------------------------------------------------------------------------------------------------------------------------------------------------------------|--------------------------------------------------------------------------------------------------------------------------------------------------------------------------------------------------------------------------------------------------------------------------------------------------------------------------------------------------------------------------|
| Study ID                                                | Participants                                                                                                                                                     | Intervention                                                                                                                                                                                                                                                                                                                                                         | Outcomes                                                                                                                                                                                                                                                                                                                                                                 |
| <b>Randomised trials</b>                                |                                                                                                                                                                  |                                                                                                                                                                                                                                                                                                                                                                      |                                                                                                                                                                                                                                                                                                                                                                          |
| Clarke et al, 1992 (25)<br><br>Community, UK            | 523 adults over 75 living alone.<br><br>Age, gender not reported                                                                                                 | <b>Referral:</b> Recruited via mail invitation<br><b>Link worker:</b> Lay community-based health worker, training and experience not specified.<br><b>Contacts:</b> Minimum 3 home visits with tailored support<br><b>Duration:</b> 2 years<br><b>Comparator:</b> Usual care                                                                                         | <b>Primary outcome:</b> Survival<br><b>Secondary outcomes:</b> Activities of daily living<br>Information/orientation score<br>Loneliness<br>Morale<br>Self-rated health<br>Social contacts<br>Primary healthcare utilisation<br><b>Costs:</b> None reported<br><b>Data collection:</b> 0, 24 months. Survival assessed at 6 monthly intervals from baseline to 3.5 years |
| Grant et al, 2000 (26)<br><br>Community, UK             | 152 adults over 16 who GP felt would benefit from intervention.<br><br>Mean age 43.2, 75% female.                                                                | <b>Referral:</b> Recruited via GP referral<br><b>Link worker:</b> Lay “referral facilitator” trained and employed by a community organisation. Based in community.<br><b>Contacts:</b> 1 face-to-face assessment within a week of referral. Average of 1.7 telephone or face-to-face contacts reported.<br><b>Duration:</b> 1 month<br><b>Comparator:</b> Usual care | <b>Primary outcomes:</b> Mental health: depression and anxiety<br>Social Support<br><b>Secondary outcomes:</b> Quality of life<br>Functional health<br>Primary healthcare utilisation including medications and referrals<br><b>Costs:</b> Intervention<br>Primary healthcare utilisation<br>Referrals to other agencies<br><b>Data collection:</b> 0, 1, 4 months       |
| Heisler et al, 2022 (29)<br><br>Community, USA          | 3,159 adults aged <65 residing in a low income zip code with >3 ED visits or 1 ambulatory care sensitive admission in last year.<br><br>Mean age 29, 64% female. | <b>Referral:</b> Recruited via Medicaid<br><b>Link worker:</b> Community health workers, familiar with zip code, trained and employed by community organisations<br><b>Contacts:</b> 55% at least one contact, mean of 1.9 contacts<br><b>Duration:</b> Tailored, but up to 1 year<br><b>Comparator:</b> Usual care                                                  | <b>Primary outcomes:</b> Healthcare utilisations including <ul style="list-style-type: none"> <li>• Ambulatory care visits</li> <li>• ED visits</li> <li>• Hospital admissions</li> </ul> <b>Costs:</b> Healthcare utilisation costs<br><b>Data collection:</b> 12 months pre and post randomisation                                                                     |

demographics and baseline outcome scores between groups. See Table 1 for a summary.



|                                                                                              |                                                   |                                                                                                                                                                         |                                                                                                                                                                                                                                                                                                                                                                                                                                                                                                                  |                                                                                                                                                                                                                                                                                                                                                                                                                                                                                                                                   |
|----------------------------------------------------------------------------------------------|---------------------------------------------------|-------------------------------------------------------------------------------------------------------------------------------------------------------------------------|------------------------------------------------------------------------------------------------------------------------------------------------------------------------------------------------------------------------------------------------------------------------------------------------------------------------------------------------------------------------------------------------------------------------------------------------------------------------------------------------------------------|-----------------------------------------------------------------------------------------------------------------------------------------------------------------------------------------------------------------------------------------------------------------------------------------------------------------------------------------------------------------------------------------------------------------------------------------------------------------------------------------------------------------------------------|
| 1<br>2<br>3<br>4<br>5<br>6<br>7<br>8<br>9<br>10<br>11<br>12<br>13<br>14<br>15<br>16<br>17    | Kangovi et al, 2018 (28)<br><br>Primary Care, USA | 592 adults attending 3 primary care clinics, who resided in a high-poverty zip code had a diagnosis for 2 or more chronic diseases.<br><br>Mean age 52.6, 62.5% female. | <b>Referral:</b> Recruited via primary care clinics<br><b>Link worker:</b> Community health workers, with high school diploma. 1 month training in motivational interviewing, action planning and on the job. Based in primary care practices.<br><b>Contacts:</b> Monthly face-to-face meetings and weekly telephone check ins.<br><b>Duration:</b> 6 months<br><b>Comparator:</b> Chronic disease goal setting with PCP only                                                                                   | <b>Primary outcome:</b> Health related quality of life, physical health component (SF-12-V2 PCS)<br><b>Secondary outcomes:</b> Health related quality of life, mental health component (SF-12-V2 MCS)<br>Patient activation<br>Chronic disease control (BP, HbA1C, BMI or CPD)<br>Patient-reported quality of primary care<br>All cause hospitalisations<br><b>Costs:</b> None reported<br><b>Data collection:</b> 0, 6, 9 months                                                                                                 |
| 18<br>19<br>20<br>21<br>22<br>23<br>24<br>25<br>26<br>27<br>28<br>29<br>30<br>31<br>32<br>33 | Kangovi et al, 2017 (27)<br><br>Community, USA    | 302 adults attending GIM clinics, living in deprived area, and were diagnosed with 2 or more chronic diseases.<br><br>Mean age 56, 74% female.                          | <b>Referral:</b> Recruited via primary care clinics<br><b>Link worker:</b> Community health workers, with high school diploma. 1 month training in motivational interviewing, action planning and on the job. Based in primary care practices.<br><b>Contacts:</b> Monthly face-to-face meetings and weekly telephone check ins.<br><b>Duration:</b> 6 months<br><b>Comparator:</b> Chronic disease goal setting with PCP only                                                                                   | <b>Primary outcome:</b> Change in chronic disease control (HbA1C, BMI, BP, or CPD)<br><b>Secondary outcomes:</b> Achievement of chronic disease management goals<br>Health related quality of life (SF-12-V2 PCS and MCS)<br>Patient activation<br>Patient reported quality of primary care<br>All cause hospitalisations<br><b>Costs:</b> Return on investment analysis reported on cost savings related to reduced hospitalisations (33)<br><b>Data collection:</b> 0, 6 months for PROMs. 6 and 12 months for hospitalisations |
| 34                                                                                           | <b>Controlled before-after studies</b>            |                                                                                                                                                                         |                                                                                                                                                                                                                                                                                                                                                                                                                                                                                                                  |                                                                                                                                                                                                                                                                                                                                                                                                                                                                                                                                   |
| 35                                                                                           | <b>Study ID</b>                                   | <b>Participants</b>                                                                                                                                                     | <b>Intervention</b>                                                                                                                                                                                                                                                                                                                                                                                                                                                                                              | <b>Outcomes</b>                                                                                                                                                                                                                                                                                                                                                                                                                                                                                                                   |
| 36<br>37<br>38<br>39<br>40<br>41<br>42<br>43<br>44<br>45<br>46<br>47<br>48<br>49             | Carnes et al, 2017 (32)<br><br>Primary Care, UK   | 480 adults frequently attending primary care, who presented with social isolation or mild mental health problems.<br><br>Median age 56, 59% female.                     | <b>Referral:</b> GP referral<br><b>Link worker:</b> 3 lay “social prescribing coordinators” (SPC) trained in social work and managed by community organisation. Based across 22 GP practices. Additional support from volunteers available.<br><b>Contacts:</b> Initial 1 hour meeting and up to 6 sessions with the SPC, unlimited volunteer support<br><b>Duration:</b> 6 months<br><b>Comparator:</b> Propensity matched controls drawn from GP practices in nearby areas with no social prescribing service. | <b>Primary outcome:</b> Not specified<br><b>Secondary outcomes:</b> Self-rated health<br>Mental Health: depression and anxiety<br>Wellbeing<br>Positive and active engagement in life<br>Number of regular activities<br>A&E visits in past 3 months<br>Annual GP consultation rate<br>Number of medications in previous 6 months<br><b>Costs:</b> None reported<br><b>Data collection:</b> 0, 8 months                                                                                                                           |

|                                                        |                                                                                                                                                      |                                                                                                                                                                                                                                                                                                                                                                                                                                                                                                                        |                                                                                                                                                                                                                                                                                                                                                                                                                          |
|--------------------------------------------------------|------------------------------------------------------------------------------------------------------------------------------------------------------|------------------------------------------------------------------------------------------------------------------------------------------------------------------------------------------------------------------------------------------------------------------------------------------------------------------------------------------------------------------------------------------------------------------------------------------------------------------------------------------------------------------------|--------------------------------------------------------------------------------------------------------------------------------------------------------------------------------------------------------------------------------------------------------------------------------------------------------------------------------------------------------------------------------------------------------------------------|
| <p>Dickens et al, 2011 (30)</p> <p>Community, UK</p>   | <p>392 adults over 50 attending primary care at risk of social isolation.</p> <p>Mean age 71, 62% male.</p>                                          | <p><b>Referral:</b> GP referral</p> <p><b>Link worker:</b> Mentors often with teaching or creative skills, managed by a community organisation. Training not described. Based in community.</p> <p><b>Contacts:</b> Face to face meetings, frequency not specified</p> <p><b>Duration:</b> 3 months</p> <p><b>Comparator:</b> Matched controls from a sample drawn from 3 GP practices in nearby areas with no mentoring service</p>                                                                                   | <p><b>Primary outcome:</b> Health related quality of life, mental health component (SF-12-V2 MCS)</p> <p><b>Secondary outcomes:</b> Health related quality of life, physical health component (SF-12-V2 PCS) Health related quality of life (EQ-5D-3L) Mental health: depression Social activities Social support Social participation</p> <p><b>Costs:</b> None reported</p> <p><b>Data collection:</b> 0, 3 months</p> |
| <p>Mercer et al, 2019 (31)</p> <p>Primary Care, UK</p> | <p>900 adults attending primary care in most deprived areas of Glasgow deemed suitable for intervention by GP.</p> <p>Median age 49, 60% female.</p> | <p><b>Referral:</b> GP referral</p> <p><b>Link worker:</b> Community links practitioners with prior experience of community work, managed by a community organisation. 1 month training on role, supporting clients, engaging practices and mapping resources. Based in GP practices.</p> <p><b>Contacts:</b> Face to face meetings. Average of 3 meetings reported.</p> <p><b>Duration:</b> 9 months</p> <p><b>Comparator:</b> Sample drawn from 6 GP practices in Glasgow without a community links practitioner</p> | <p><b>Primary outcome:</b> Health related quality of life (EQ-5D-5L)</p> <p><b>Secondary outcomes:</b> Wellbeing Mental Health: depression and anxiety Work and social adjustment scale Self-reported lifestyle behaviors (smoking, alcohol, exercise)</p> <p><b>Costs:</b> None reported</p> <p><b>Data collection:</b> 0, 9 months</p>                                                                                 |

## Risk of bias

We used the EPOC guidance to assess risk of bias for both RCTs and CBAs, but have reported them separately for each study design. The RCTs had low risk of bias overall, despite blinding of participants not being possible given the nature of the intervention. Randomization processes were not clearly reported in one RCT.<sup>(25)</sup> There was high risk of bias in the CBAs. This was due to differences in baseline characteristics and limitations in randomization and allocation concealment due to study design. A summary of the risk of bias is shown in Figure 2. The full risk of bias assessment for all outcomes is available in Appendix 4 in supplementary data. (16)

## Certainty of evidence

For the primary outcomes, the certainty across all study types was low for HRQoL and very low for mental health due to risk of bias, indirectness resulting from differences in interventions and populations across studies, inconsistencies in results and imprecision. The certainty was low for social supports, self-rated health and very low for physical function and activities. For health care utilization, there was very low certainty evidence for hospitalisations based on the US based RCTs.(27-29) There was low certainty evidence for primary care visits, due to indirectness, imprecision and risk of bias. See Table 2.

Table 1. GRADE summary of findings

| <b>Title: Effect of social prescribing link workers on health outcomes and costs for adults in primary care and community settings</b><br><b>Patients or population:</b> Community dwelling adults<br><b>Settings:</b> Primary and community care<br><b>Intervention:</b> Social prescribing link workers<br><b>Comparison:</b> Usual care |                                                                                                                           |                                                        |                                                                                                              |
|--------------------------------------------------------------------------------------------------------------------------------------------------------------------------------------------------------------------------------------------------------------------------------------------------------------------------------------------|---------------------------------------------------------------------------------------------------------------------------|--------------------------------------------------------|--------------------------------------------------------------------------------------------------------------|
| Outcome                                                                                                                                                                                                                                                                                                                                    | Review finding                                                                                                            | Contributing studies (participants)                    | Overall GRADE assessment                                                                                     |
| Health related quality of life                                                                                                                                                                                                                                                                                                             | Social prescribing link workers may have little or no impact on HRQoL.                                                    | 2 RCTs (894).<br>US based<br>2 CBAs (1292)<br>UK based | ⊕⊕⊖⊖<br>Low<br><br>(Low for RCTs <sup>b, c, d</sup> .<br>Low for CBAs )                                      |
| Mental health                                                                                                                                                                                                                                                                                                                              | It is unknown if social prescribing link workers improve mental health because the certainty of the evidence is very low. | 1 RCT (152).<br>3 CBAs (1772)<br>All UK based          | ⊕⊖⊖⊖<br>Very Low <sup>f</sup><br><br>(Low for RCT <sup>b, c</sup><br>and Very Low for CBAs <sup>a, b</sup> ) |
| Social contacts and support                                                                                                                                                                                                                                                                                                                | Social prescribing link workers may lead to little or no difference in social contacts.                                   | 2 RCTs (714).<br>1 CBA (392)                           | ⊕⊕⊖⊖<br>Low<br><br>(Low for RCTs <sup>b, d</sup> ,                                                           |

|                                                                                                                                                                                                                                                                                                                                                                                                                                                                                                                                                     |                                                                                                                                            |                                                                 |                                                                                            |
|-----------------------------------------------------------------------------------------------------------------------------------------------------------------------------------------------------------------------------------------------------------------------------------------------------------------------------------------------------------------------------------------------------------------------------------------------------------------------------------------------------------------------------------------------------|--------------------------------------------------------------------------------------------------------------------------------------------|-----------------------------------------------------------------|--------------------------------------------------------------------------------------------|
|                                                                                                                                                                                                                                                                                                                                                                                                                                                                                                                                                     |                                                                                                                                            | All UK based                                                    | Low for CBAs)                                                                              |
| Physical function and activities                                                                                                                                                                                                                                                                                                                                                                                                                                                                                                                    | It is unknown if social prescribing link workers improve physical function and activity because the certainty of the evidence is very low. | 2 RCTs (714)<br>2 CBAs (1380)<br>All UK based                   | ⊕⊕⊕⊕<br>Very low<br><br>(Very Low RCTs <sup>b,c,d</sup> and Very Low CBAs <sup>a,d</sup> ) |
| Self-rated health                                                                                                                                                                                                                                                                                                                                                                                                                                                                                                                                   | Social prescribing link workers may improve self-rated health.                                                                             | 2 RCTs (714)<br>1 CBA (480)<br>All UK based                     | ⊕⊕⊕⊕<br>Low<br><br>(Low RCTs <sup>b,c</sup> and Low CBA <sup>a</sup> )                     |
| Health care utilisation: hospitalisation                                                                                                                                                                                                                                                                                                                                                                                                                                                                                                            | It is unknown if social prescribing link workers reduce hospitalisations because the certainty of the evidence is very low.                | 3 RCTs (4053)<br>US based                                       | ⊕⊕⊕⊕ <sup>b,c</sup><br>Very Low                                                            |
| Health care utilisation: primary care visits                                                                                                                                                                                                                                                                                                                                                                                                                                                                                                        | Social prescribing link workers may have little or no impact on primary care visits.                                                       | 3 RCTs (3873)<br>2 UK and 1 US based<br>1 CBA (480)<br>UK based | ⊕⊕⊕⊕<br>Low<br><br>(Low RCTs <sup>b,d</sup> , Very Low for CBAs <sup>a</sup> )             |
| <p>RCTs and CBAs were assessed separately for each outcome. If there was limited RCT evidence, then an overall judgement was applied. In this case if there were inconsistencies in results between the two bodies of evidence this was downgraded by one level.</p> <p><sup>a</sup> Downgraded for risk of bias. <sup>b</sup> Downgraded for indirectness. <sup>c</sup> Downgraded for Inconsistency. <sup>d</sup> Downgraded for imprecision. <sup>e</sup> Downgraded for publication bias <sup>f</sup> Downgraded for overall inconsistency.</p> |                                                                                                                                            |                                                                 |                                                                                            |

See Appendix 5 in supplementary data for the full GRADE summary sheet. (16)

### Effectiveness of link worker interventions

#### Primary outcomes

Four of the eight studies (two RCTs and two CBAs) reported on HRQoL (27, 28, 30, 31) .

Two studies used the EQ-5D measure with one study reporting no difference, (31) while the other study reported a small significant difference between the intervention and control

group, in favour of the control group. (30) Three studies used the SF-12 measure, with one of the three reporting a significant difference in favour of the intervention for the mental health component score, (27) whereas, none of the three studies reported any difference in physical component scores (27) whereas, none of the three studies reported any difference in physical component scores (27, 28, 30). Four studies reported on mental health (26, 30-32) using HADS-D, HADS-A or GDS-10. Only one of these studies reported evidence of a significant improvement in HADS-A, (aMD -1.9 (95% CI: -3.0 to -0.7)).(26) The remaining three studies found no evidence of a difference between groups for any mental health outcomes. See Table 3 for a summary of the primary outcome effects.

Table 2. Primary outcomes: mean at follow up and adjusted mean differences

| Health-related quality of life  |                                          |                        |                   |                                              |
|---------------------------------|------------------------------------------|------------------------|-------------------|----------------------------------------------|
| Study ID                        | Outcome measure                          | Intervention Mean (SD) | Control Mean (SD) | Adjusted mean differences (95% CI)           |
| Kangovi et al, US 2018 RCT (28) | Physical Health Component (SF-12-V2 PCS) | 1.8 (11.2)             | 1.6 (9.9)         | -0.7 (-2.2 to 0.7) <sup>a</sup><br>P=0.3     |
|                                 | Mental Health Component (SF-12-V2 MCS)   | 2.2 (13.3)             | 1.2 (14.1)        | 0.8 (-1.1 to 2.6) <sup>a</sup><br>P=0.41     |
| Kangovi et al, US 2017 RCT (27) | Physical Health Component (SF-12-V2 PCS) | 0.9*                   | 0.5*              | P=0.66                                       |
|                                 | Mental Health Component (SF-12-V2 MCS)   | 2.3*                   | 0.2*              | P=0.008                                      |
| Dickens et al UK 2011 CBA (30)  | Physical Health Component (SF-12-V2 PCS) | 34.8 (11.4)            | 42.7 (12.6)       | 0.8 (-1.5, 3.2) <sup>b</sup><br>P=0.48       |
|                                 | Mental Health Component (SF-12-V2 MCS)   | 46.7 (11.2)            | 49.2 (10.0)       | 0.1 (-1.9, 2.1) <sup>b</sup><br>P=0.9        |
|                                 | EQ-5D-3L                                 | 0.6 (0.3)              | 0.8 (0.2)         | -0.09 (-0.14, -0.03) <sup>b</sup><br>P<0.001 |

|    |                                                                                                                                                                                                                                                                                                                                                                                                                                                                                                                                                                                                                                                                                                                                                                                                                                                                                                                                                                         |                                                         |            |            |                                      |
|----|-------------------------------------------------------------------------------------------------------------------------------------------------------------------------------------------------------------------------------------------------------------------------------------------------------------------------------------------------------------------------------------------------------------------------------------------------------------------------------------------------------------------------------------------------------------------------------------------------------------------------------------------------------------------------------------------------------------------------------------------------------------------------------------------------------------------------------------------------------------------------------------------------------------------------------------------------------------------------|---------------------------------------------------------|------------|------------|--------------------------------------|
| 1  |                                                                                                                                                                                                                                                                                                                                                                                                                                                                                                                                                                                                                                                                                                                                                                                                                                                                                                                                                                         |                                                         |            |            |                                      |
| 2  |                                                                                                                                                                                                                                                                                                                                                                                                                                                                                                                                                                                                                                                                                                                                                                                                                                                                                                                                                                         |                                                         |            |            |                                      |
| 3  |                                                                                                                                                                                                                                                                                                                                                                                                                                                                                                                                                                                                                                                                                                                                                                                                                                                                                                                                                                         |                                                         |            |            |                                      |
| 4  | <b>Mercer et al,</b>                                                                                                                                                                                                                                                                                                                                                                                                                                                                                                                                                                                                                                                                                                                                                                                                                                                                                                                                                    |                                                         |            |            |                                      |
| 5  | <b>UK 2019</b>                                                                                                                                                                                                                                                                                                                                                                                                                                                                                                                                                                                                                                                                                                                                                                                                                                                                                                                                                          |                                                         | Not        | Not        | 0.008 (−0.028 to 0.045) <sup>c</sup> |
| 6  | <b>CBA (31)</b>                                                                                                                                                                                                                                                                                                                                                                                                                                                                                                                                                                                                                                                                                                                                                                                                                                                                                                                                                         | EQ-5D-5L                                                | reported   | reported   | P=0.648                              |
| 7  | <b>Mental health</b>                                                                                                                                                                                                                                                                                                                                                                                                                                                                                                                                                                                                                                                                                                                                                                                                                                                                                                                                                    |                                                         |            |            |                                      |
| 8  |                                                                                                                                                                                                                                                                                                                                                                                                                                                                                                                                                                                                                                                                                                                                                                                                                                                                                                                                                                         |                                                         |            |            |                                      |
| 9  | <b>Grant et al, UK</b>                                                                                                                                                                                                                                                                                                                                                                                                                                                                                                                                                                                                                                                                                                                                                                                                                                                                                                                                                  |                                                         |            |            |                                      |
| 10 | <b>2000</b>                                                                                                                                                                                                                                                                                                                                                                                                                                                                                                                                                                                                                                                                                                                                                                                                                                                                                                                                                             |                                                         |            |            |                                      |
| 11 | <b>RCT (26)</b>                                                                                                                                                                                                                                                                                                                                                                                                                                                                                                                                                                                                                                                                                                                                                                                                                                                                                                                                                         | Depression (HADS-D)                                     | 7.1 (4.5)  | 9.4 (4.9)  | −0.9 (−1.9 to 0.2) <sup>d</sup>      |
| 12 |                                                                                                                                                                                                                                                                                                                                                                                                                                                                                                                                                                                                                                                                                                                                                                                                                                                                                                                                                                         |                                                         |            |            | P=0.116                              |
| 13 | <b>Carnes et al,</b>                                                                                                                                                                                                                                                                                                                                                                                                                                                                                                                                                                                                                                                                                                                                                                                                                                                                                                                                                    |                                                         |            |            |                                      |
| 14 | <b>UK 2017</b>                                                                                                                                                                                                                                                                                                                                                                                                                                                                                                                                                                                                                                                                                                                                                                                                                                                                                                                                                          |                                                         |            |            |                                      |
| 15 | <b>CBA (32)</b>                                                                                                                                                                                                                                                                                                                                                                                                                                                                                                                                                                                                                                                                                                                                                                                                                                                                                                                                                         | Depression (HADS-D)                                     | 10.1 (5.0) | 5.9 (5.2)  | 0.857 (−0.737, 2.451) <sup>e</sup>   |
| 16 |                                                                                                                                                                                                                                                                                                                                                                                                                                                                                                                                                                                                                                                                                                                                                                                                                                                                                                                                                                         |                                                         |            |            | P=not reported                       |
| 17 | <b>Dickens et al,</b>                                                                                                                                                                                                                                                                                                                                                                                                                                                                                                                                                                                                                                                                                                                                                                                                                                                                                                                                                   |                                                         |            |            |                                      |
| 18 | <b>UK 2015</b>                                                                                                                                                                                                                                                                                                                                                                                                                                                                                                                                                                                                                                                                                                                                                                                                                                                                                                                                                          |                                                         |            |            |                                      |
| 19 | <b>CBA (30)</b>                                                                                                                                                                                                                                                                                                                                                                                                                                                                                                                                                                                                                                                                                                                                                                                                                                                                                                                                                         | Depression (GDS-10)                                     | 4.1 (2.4)  | 2.2 (2.1)  | 0.2 (−0.2, 0.7) <sup>b</sup>         |
| 20 |                                                                                                                                                                                                                                                                                                                                                                                                                                                                                                                                                                                                                                                                                                                                                                                                                                                                                                                                                                         |                                                         |            |            | P=0.29                               |
| 21 | <b>Mercer et al,</b>                                                                                                                                                                                                                                                                                                                                                                                                                                                                                                                                                                                                                                                                                                                                                                                                                                                                                                                                                    |                                                         |            |            |                                      |
| 22 | <b>UK 2019</b>                                                                                                                                                                                                                                                                                                                                                                                                                                                                                                                                                                                                                                                                                                                                                                                                                                                                                                                                                          |                                                         | Not        | Not        | 0.09 (−0.49 to 0.68) <sup>c</sup>    |
| 23 | <b>CBA (31)</b>                                                                                                                                                                                                                                                                                                                                                                                                                                                                                                                                                                                                                                                                                                                                                                                                                                                                                                                                                         | Depression (HADS-D)                                     | reported   | reported   | P=0.753                              |
| 24 | <b>Grant et al, UK</b>                                                                                                                                                                                                                                                                                                                                                                                                                                                                                                                                                                                                                                                                                                                                                                                                                                                                                                                                                  |                                                         |            |            |                                      |
| 25 | <b>2000</b>                                                                                                                                                                                                                                                                                                                                                                                                                                                                                                                                                                                                                                                                                                                                                                                                                                                                                                                                                             | Anxiety                                                 |            |            |                                      |
| 26 | <b>RCT (26)</b>                                                                                                                                                                                                                                                                                                                                                                                                                                                                                                                                                                                                                                                                                                                                                                                                                                                                                                                                                         | (HADS-A)                                                | 10.6 (4.2) | 12.7 (4.3) | −1.9 (−3.0 to −0.7) <sup>a</sup>     |
| 27 |                                                                                                                                                                                                                                                                                                                                                                                                                                                                                                                                                                                                                                                                                                                                                                                                                                                                                                                                                                         |                                                         |            |            | P=0.002                              |
| 28 | <b>Carnes et al,</b>                                                                                                                                                                                                                                                                                                                                                                                                                                                                                                                                                                                                                                                                                                                                                                                                                                                                                                                                                    |                                                         |            |            |                                      |
| 29 | <b>UK 2017</b>                                                                                                                                                                                                                                                                                                                                                                                                                                                                                                                                                                                                                                                                                                                                                                                                                                                                                                                                                          | Anxiety                                                 |            |            |                                      |
| 30 | <b>CBA(32)</b>                                                                                                                                                                                                                                                                                                                                                                                                                                                                                                                                                                                                                                                                                                                                                                                                                                                                                                                                                          | (HADS-A)                                                | 11.2 (5.0) | 7.6 (5.4)  | −0.119 (−0.847, 1.609) <sup>e</sup>  |
| 31 |                                                                                                                                                                                                                                                                                                                                                                                                                                                                                                                                                                                                                                                                                                                                                                                                                                                                                                                                                                         |                                                         |            |            | P=not reported                       |
| 32 | <b>Mercer et al,</b>                                                                                                                                                                                                                                                                                                                                                                                                                                                                                                                                                                                                                                                                                                                                                                                                                                                                                                                                                    |                                                         |            |            |                                      |
| 33 | <b>UK 2019</b>                                                                                                                                                                                                                                                                                                                                                                                                                                                                                                                                                                                                                                                                                                                                                                                                                                                                                                                                                          | Anxiety                                                 | Not        | Not        | −0.41 (−0.99 to 0.18) <sup>c</sup>   |
| 34 | <b>CBA (31)</b>                                                                                                                                                                                                                                                                                                                                                                                                                                                                                                                                                                                                                                                                                                                                                                                                                                                                                                                                                         | (HADS-A)                                                | reported   | reported   | P=0.172                              |
| 35 | <b>Clarke et al,</b>                                                                                                                                                                                                                                                                                                                                                                                                                                                                                                                                                                                                                                                                                                                                                                                                                                                                                                                                                    |                                                         |            |            |                                      |
| 36 | <b>UK 1992</b>                                                                                                                                                                                                                                                                                                                                                                                                                                                                                                                                                                                                                                                                                                                                                                                                                                                                                                                                                          | HRQoL or mental health were not outcomes for this trial |            |            |                                      |
| 37 | <b>RCT (25)</b>                                                                                                                                                                                                                                                                                                                                                                                                                                                                                                                                                                                                                                                                                                                                                                                                                                                                                                                                                         |                                                         |            |            |                                      |
| 38 | <b>Heisler et al,</b>                                                                                                                                                                                                                                                                                                                                                                                                                                                                                                                                                                                                                                                                                                                                                                                                                                                                                                                                                   |                                                         |            |            |                                      |
| 39 | <b>US 2022</b>                                                                                                                                                                                                                                                                                                                                                                                                                                                                                                                                                                                                                                                                                                                                                                                                                                                                                                                                                          | HRQoL or mental health were not outcomes for this trial |            |            |                                      |
| 40 | <b>RCT (29)</b>                                                                                                                                                                                                                                                                                                                                                                                                                                                                                                                                                                                                                                                                                                                                                                                                                                                                                                                                                         |                                                         |            |            |                                      |
| 41 | SF-12v2= Short Form Health Survey, is often used as a health-related quality of life measure, with Physical (PCS) and Mental (MCS) health components reported separately on a scale of 0-100 with 100 representing maximal health. EQ-5D-5L=a standardized measure of self-reported health-related quality of life that assesses 5 dimensions at 5 levels of severity where 1 is the preferred state of health. EQ-5D-3L=an earlier version of EQ-5D-5L with 3 levels. GDS =Geriatric Depression Scale, a screening tool for depression in older people with a score of 4 or more indicating possible depression. HADS = Hospital Anxiety and Depression Scale measured on a scale of 0-42 where a higher score indicates worse mental health. HADS-A=Hospital Anxiety and Depression Scale, Anxiety, where a score above 10 indicates possible caseness; HADS-D=Hospital Anxiety and Depression Scale, Depression, where a score above 10 indicates possible caseness. |                                                         |            |            |                                      |
| 42 | * Unadjusted mean difference - SD and adjusted mean differences not reported. <sup>a</sup> Longitudinal estimated difference in difference from 6 to 9 months adjusted for site and chronic disease. <sup>b</sup> Adjusted for employment status, accommodation type and living circumstances. <sup>c</sup> Adjusted for age, sex, SIMD, comorbidity, and significant baseline outcome measures as covariates and includes practice identifier as a random effects term. <sup>d</sup> Adjusted for baseline results. <sup>e</sup> Adjusted for age, sex, ethnicity, employment status and living arrangement.                                                                                                                                                                                                                                                                                                                                                           |                                                         |            |            |                                      |
| 43 |                                                                                                                                                                                                                                                                                                                                                                                                                                                                                                                                                                                                                                                                                                                                                                                                                                                                                                                                                                         |                                                         |            |            |                                      |
| 44 |                                                                                                                                                                                                                                                                                                                                                                                                                                                                                                                                                                                                                                                                                                                                                                                                                                                                                                                                                                         |                                                         |            |            |                                      |
| 45 |                                                                                                                                                                                                                                                                                                                                                                                                                                                                                                                                                                                                                                                                                                                                                                                                                                                                                                                                                                         |                                                         |            |            |                                      |
| 46 |                                                                                                                                                                                                                                                                                                                                                                                                                                                                                                                                                                                                                                                                                                                                                                                                                                                                                                                                                                         |                                                         |            |            |                                      |
| 47 |                                                                                                                                                                                                                                                                                                                                                                                                                                                                                                                                                                                                                                                                                                                                                                                                                                                                                                                                                                         |                                                         |            |            |                                      |
| 48 |                                                                                                                                                                                                                                                                                                                                                                                                                                                                                                                                                                                                                                                                                                                                                                                                                                                                                                                                                                         |                                                         |            |            |                                      |
| 49 |                                                                                                                                                                                                                                                                                                                                                                                                                                                                                                                                                                                                                                                                                                                                                                                                                                                                                                                                                                         |                                                         |            |            |                                      |
| 50 |                                                                                                                                                                                                                                                                                                                                                                                                                                                                                                                                                                                                                                                                                                                                                                                                                                                                                                                                                                         |                                                         |            |            |                                      |
| 51 |                                                                                                                                                                                                                                                                                                                                                                                                                                                                                                                                                                                                                                                                                                                                                                                                                                                                                                                                                                         |                                                         |            |            |                                      |
| 52 |                                                                                                                                                                                                                                                                                                                                                                                                                                                                                                                                                                                                                                                                                                                                                                                                                                                                                                                                                                         |                                                         |            |            |                                      |
| 53 |                                                                                                                                                                                                                                                                                                                                                                                                                                                                                                                                                                                                                                                                                                                                                                                                                                                                                                                                                                         |                                                         |            |            |                                      |
| 54 |                                                                                                                                                                                                                                                                                                                                                                                                                                                                                                                                                                                                                                                                                                                                                                                                                                                                                                                                                                         |                                                         |            |            |                                      |
| 55 |                                                                                                                                                                                                                                                                                                                                                                                                                                                                                                                                                                                                                                                                                                                                                                                                                                                                                                                                                                         |                                                         |            |            |                                      |
| 56 |                                                                                                                                                                                                                                                                                                                                                                                                                                                                                                                                                                                                                                                                                                                                                                                                                                                                                                                                                                         |                                                         |            |            |                                      |
| 57 |                                                                                                                                                                                                                                                                                                                                                                                                                                                                                                                                                                                                                                                                                                                                                                                                                                                                                                                                                                         |                                                         |            |            |                                      |
| 58 |                                                                                                                                                                                                                                                                                                                                                                                                                                                                                                                                                                                                                                                                                                                                                                                                                                                                                                                                                                         |                                                         |            |            |                                      |
| 59 |                                                                                                                                                                                                                                                                                                                                                                                                                                                                                                                                                                                                                                                                                                                                                                                                                                                                                                                                                                         |                                                         |            |            |                                      |
| 60 |                                                                                                                                                                                                                                                                                                                                                                                                                                                                                                                                                                                                                                                                                                                                                                                                                                                                                                                                                                         |                                                         |            |            |                                      |

## Secondary outcomes

A wide range of other outcomes was reported, with the studies reporting a mean of six outcomes each, including a range of patient reported outcomes (PROMS). Three reported on a measure of social contact or support and found no evidence of a difference between groups (25, 26, 30). One study reported that intervention participants were more likely to rate getting along with others as “worse” than controls, indicating a possible negative effect (30). In terms of other PROMs, two studies found a positive impact on self-rated health (25, 26), one study found a positive effect for general quality of life, assessed by the Delighted Terrible Faces scale (26) and two studies reported a positive finding on patient rating of high quality care (27, 28). There were no reported differences for patient activation (27, 28), wellbeing (31, 32), loneliness (25), morale (25), work and social adjustment (31) or active participation in life (32). Of the four studies that reported a measure of physical activity and function, one study found an improvement in functional health (26), while two others found no evidence of a difference in ADLs (25), or physical activity (31) and the final study found a reduction in usual activities (32). Three studies reported clinical outcomes, one reported on survival over a three year period (25) and two looked at chronic disease control for smoking, diabetes, obesity and hypertension (27, 28). None reported a statistically significant difference between groups.

Six studies reported on health care utilization, with four reporting on primary care utilization (25, 26, 29, 32) and three on hospitalisations (27-29). One study reported a reduction in primary care attendances in the intervention group, but the control group were significantly different and the authors concluded that their findings more likely represented regression to the mean (32); of the remaining studies two found no evidence of an effect on primary health care attendances and one US based study actually found an increase in ambulatory care

1  
2  
3 utilisation.(29) One of the two US studies evaluating the IMPaCT intervention found a 24 %  
4  
5 risk reduction in repeat hospital admissions during the 12 month follow up period (28); the  
6  
7 other reported a similar reduction, but it did not reach statistical significance (27). The third  
8  
9 study that reported hospital admissions found no significant decrease, but there was a  
10  
11 decrease in ED attendances. (29) See Appendix 6 in supplementary data for a full list of  
12  
13 outcomes and effects for each study.  
14  
15  
16  
17

### 18 **Costs and cost effectiveness**

19  
20  
21 No cost utility or cost effectiveness analyses were identified in our search. Three RCTs  
22  
23 reported on costs (26, 29, 33); one as a cost analysis, one on health care utilisation costs only,  
24  
25 and the third as a separately published return on investment analysis of an included RCT (27).  
26  
27 The cost analysis looked at primary care visits, medications, referrals and interventions costs.  
28  
29 While the study found a reduction in healthcare costs due to a reduction in referrals, these  
30  
31 savings did not offset the costs of the intervention. Therefore, the authors concluded that the  
32  
33 intervention was more costly than usual care. The analysis did not consider any measure of  
34  
35 health benefits to participants such as quality of life years gained.(26) The trial that looked at  
36  
37 health care utilization did not report intervention costs. They found that the intervention  
38  
39 group had slightly lower ED costs, higher ambulatory care costs and no difference in  
40  
41 hospitalisation costs. (29) The return-on-investment study examined cost savings related to  
42  
43 hospitalisations and outpatient attendances from routine data and included detailed costing of  
44  
45 the intervention, which was calculated at \$1721.06 per participant. While the number of  
46  
47 reduced hospital days was statistically non-significant, they estimated a return of \$2.47 for  
48  
49 every \$1 spent on the intervention.(33)  
50  
51  
52  
53  
54  
55  
56  
57  
58  
59  
60



### Subgroup synthesis: multimorbidity and social deprivation

Four of the eight studies reported a measure of multimorbidity or comorbidity. Two of these were RCTs of the IMPaCT intervention in the US and recruited participants with two or more chronic conditions including hypertension, diabetes, obesity and tobacco dependence.(27, 28) One was a CBA of the Glasgow Deep End link worker intervention and reported a mean of 3.1 chronic conditions in the intervention group, but this was not an inclusion criterion.(31) The final study was a US based RCT and reported that 27% of participants had a Charlson Comorbidity index of greater than two. All four studies targeted participants in areas of deprivation. Three of these studies measure HRQoL. Two of the studies found no effect and one of the US trials finding an effect on the Mental Health Component of the SF-12-V2 only,(27) which was not replicated in the second trial of this intervention. (28) Only the Deep End link worker CBA reported on mental health and found no evidence of a difference between groups. There were no reported significant effects on other patient reported outcome measures or chronic disease control. The RCTs of the IMPaCT intervention found a consistent improvement in the proportion of participants reporting high quality primary care. Both also examined hospitalisations, reporting fewer total days in hospital, although this only reached statistical significance in one of the two studies. The other US based trial that focused on frequent ED attenders in a deprived zip code found a reduction in ED attendances, but increased costs of ambulatory care and no difference in hospitalisations. (29)

### DISCUSSION

We identified eight studies and one economic evaluation of an included study, but we found no consistent evidence to support the effectiveness of social prescribing link worker interventions for improving health related quality of life or mental health. There was no evidence for effectiveness in improving social support, physical function and activities, or

1  
2  
3 primary healthcare utilization, though there was a suggestion from two studies that  
4  
5 interventions led to improved self-rated health and two others reported higher patient ratings  
6  
7 for quality care. Three of the studies specifically included participants experiencing  
8  
9 multimorbidity and social deprivation with similar findings for health-related quality of life,  
10  
11 though two U.S. RCTs reported a reduction in total days in hospital for people with  
12  
13 multimorbidity with low certainty evidence. The certainty of the evidence is low or very low  
14  
15 overall due to risk of bias, heterogeneity amongst studies, inconsistency and imprecision.  
16  
17  
18

19  
20 Our systematic review has not identified any evidence on the cost effectiveness of social  
21  
22 prescribing link workers. There is some evidence of cost savings based on reduced  
23  
24 hospitalisations, but this was a US based study of an intense structured six-month  
25  
26 intervention and may not translate to other healthcare systems.(33) Only one UK based study  
27  
28 reported costs, showing a reduction in referral costs, but no cost benefit analysis or cost  
29  
30 utility analysis was undertaken.(26) The economic evaluation of social prescribing link  
31  
32 workers in the literature is weak.  
33  
34  
35

36  
37 There remains a lack of studies with a randomised design since the 2017 review (10) that  
38  
39 called for “less rhetoric and more reality”. There have been many uncontrolled before-after  
40  
41 studies identified in subsequent reviews, (11, 12, 35) but the last RCT in a UK setting was  
42  
43 over 20 years ago. (26) Widening our search beyond the UK setting resulted in the  
44  
45 identification of three relevant RCTs and a return-on-investment analysis in a US setting. (27,  
46  
47 28, 33). Ours is the first review to look specifically at populations experiencing  
48  
49 multimorbidity or deprivation. We identified some evidence to support reduced hospital  
50  
51 admissions for people experiencing multimorbidity and deprivation in the US. Two of these  
52  
53 studies also found an improvement in patients rating of the quality of their primary care,  
54  
55 which has been reported in previous multimorbidity studies. (36). The 2021 systematic  
56  
57 review of multimorbidity highlighted the potential for interventions to improve patients  
58  
59  
60

1  
2  
3 experience of care, (7) which some have argued should be an end in itself. (37). We reported  
4  
5 on the intensity of the intervention, often omitted from previous reviews and indeed in many  
6  
7 of the articles in this review. While intensity varied, a more intense intervention with a  
8  
9 healthcare coordination component was the only one with a positive impact on healthcare  
10  
11 utilisation.(33) These findings demonstrate that it is possible to conduct RCTs of social  
12  
13 prescribing link worker interventions, but for those with complex needs more intense  
14  
15 interventions delivered alongside chronic disease management programmes may be required  
16  
17 to improve outcomes.  
18  
19  
20  
21

22  
23 The main outcomes for the current review were HRQoL and mental health based on the core  
24  
25 outcome set in multimorbidity (21), but only two of the seven studies reported on both of  
26  
27 these (30, 31). With one exception (25) the rest reported on at least one. Most studies did  
28  
29 cover some of the NHS draft outcome framework for social prescribing recommended  
30  
31 outcomes: wellbeing, social connectedness, ability to manage day-to-day and physical  
32  
33 activity. (3) However, as per previous reviews (10, 11, 38) there was a lot of variation in  
34  
35 outcomes included and how they were measured, making it difficult to synthesise studies and  
36  
37 further weakening the evidence. The outcomes chosen, in particular HRQoL may also have  
38  
39 been difficult to improve in the short time frame of most studies. Improving social  
40  
41 connections is one of the key mechanisms by which social prescribing is thought to improve  
42  
43 outcomes, (39, 40), but only three studies reported on this. Including this as an outcome in  
44  
45 future may help demonstrate interim impact, with the caveat that both relationships and  
46  
47 causal mechanisms between social connection and health and well-being are still contested.  
48  
49  
50  
51  
52

### 53 **Strengths and limitations**

54  
55

56 This review involved a rigorous search of the international literature including all languages  
57  
58 and the Grey Literature. We used a wide range of terms to describe the link worker role,  
59  
60

1  
2  
3 providing additional evidence on social prescribing link worker interventions. We had robust  
4 study design, inclusion criteria and only included studies that met the Cochrane EPOC  
5 guidance for inclusion in a systematic review.(23) Additional potentially eligible studies did  
6 not meet the inclusion criteria for this review due to non-contemporaneous comparisons, too  
7 few sites or offering some sort of social prescribing intervention to control groups.(41-43)  
8 Previous reviews have included uncontrolled studies with the argument that they are used by  
9 policy makers as evidence of effectiveness,(12) however, including these studies with weaker  
10 designs can lead to inflated effect sizes and distort the current evidence base. Unlike previous  
11 reviews, (10-12, 35, 44) we appraised the overall certainty of the evidence for our selected  
12 outcomes, which was low or very low for most outcomes. This review provides the most up  
13 to date review of evidence internationally for social prescribing link worker interventions.  
14

15 Due to the complex nature of social prescribing link worker interventions, there may have  
16 been a degree of subjectivity in determining which ones to include. To minimize this all full  
17 texts were independently reviewed and where there was a question over intervention  
18 inclusion, it was discussed with a third author. Our protocol made it clear that it was  
19 important that social prescribing was the main element of the intervention, but interpretation  
20 of this is also dependent on reporting in potentially eligible studies (17). The field is rapidly  
21 expanding, and we may have missed studies published since July 2021. Our forward citation  
22 search carried out in June 2022 will go some way to mitigate this. We are also aware of  
23 protocols that have not published results or were suspended due to COVID-19, including an  
24 RCT that we have conducted with analysis ongoing.(45)  
25  
26  
27  
28  
29  
30  
31  
32  
33  
34  
35  
36  
37  
38  
39  
40  
41  
42  
43  
44  
45  
46  
47  
48  
49  
50  
51  
52

### 53 **Implications for policy and practice**

54  
55  
56 It could be argued that only four of the studies tested interventions that reflect the format of  
57 current social prescribing link worker activities in the UK, which are relatively short and  
58  
59  
60

1  
2  
3 tailored to the individual and locality, with a high degree of flexibility (26, 30-32). Even  
4  
5 among these, there is variation in terms of the intensity of support and link worker location,  
6  
7 with both community and primary care settings. Embedding link workers in a general  
8  
9 practice setting can facilitate more intense support and a focus on healthcare coordination,  
10  
11 such as in the US IMPaCT intervention.(34) One of the UK studies reported that a sub-group  
12  
13 of participants who met a link worker three or more times had improvements in HRQoL,  
14  
15 mental health and exercise, suggesting intervention duration and intensity is important to  
16  
17 consider.(31) Current plans for social prescribing link workers in Ireland and the UK suggest  
18  
19 at least double the link worker caseload of the IMPaCT intervention, (46, 47) and a shorter  
20  
21 intervention, that may limit link worker capacity to provide the level of support required to  
22  
23 provide benefit, particularly for people with multimorbidity living in deprived areas. There is  
24  
25 a need to consider flexibility in how new link worker social prescribing interventions are  
26  
27 implemented until more evidence is available on how much and what type of support is  
28  
29 required and whether such support needs to be better targeted given ever tighter budget  
30  
31 constraints and existing health inequalities.  
32  
33  
34  
35  
36  
37

38 Policy makers need to be aware that there is insufficient evidence to assess the effectiveness  
39  
40 of social prescribing link workers and none on the cost effectiveness so the opportunity cost  
41  
42 is unknown. While it is anticipated that social prescribing link workers will reduce healthcare  
43  
44 utilization at the primary care level (9), many evaluations of social prescribing link worker  
45  
46 services struggle to get access to healthcare utilisation data.(48) Robust evaluations with both  
47  
48 patient reported outcome data and access to healthcare utilisation data to assist economic  
49  
50 evaluations need to be embedded into social prescribing programmes. Evidence from this  
51  
52 review suggests that such evaluations are possible and that more intense interventions for  
53  
54 certain high-need subgroups are worth developing and evaluating in local health care  
55  
56 contexts.  
57  
58  
59  
60

1  
2  
3 The PPI group felt a flexible approach was necessary as some people may need longer  
4 support, but also raised the issue of fairness for those who have less complex needs who  
5 could benefit from shorter interventions. They agreed with the author team's conclusions that  
6 social prescribing link workers should not be rolled out more widely without evaluations built  
7 in and also felt that outcomes and the way they were measured would benefit from patient  
8 input.  
9

### 17 **Implications for future research**

20 For future research and evaluations to address the evidence gap a number of challenges need  
21 to be overcome. Social prescribing interventions are meant to be flexible and tailored, not just  
22 to the individual, but also the context. This however results in a lot of heterogeneity and  
23 difficulty in assessing an overall body of evidence. Future studies could address this by  
24 reporting on reasons for referral, duration of intervention, number of contacts and link worker  
25 caseload. Further research is also needed to better understand the components of social  
26 prescribing and indeed is underway.(49) Since the pandemic link workers have adapted to  
27 restrictions and use more remote supports, which has impacted participants experiences. (50)  
28 The impact of this on outcomes is yet to be evaluated.  
29  
30  
31  
32  
33  
34  
35  
36  
37  
38  
39  
40  
41

42 There are no agreed outcomes or measures for social prescribing. The NHS does not  
43 recommend any specific measures in its draft outcomes framework that recommends self-  
44 management, physical activity and social connectedness as individual outcomes. (3). The  
45 Health Service Executive in Ireland also recommends assessing wellbeing and social  
46 connectedness, but not mental health or HRQoL (48). Without the inclusion of a measure that  
47 can be used for cost utility analysis, building the evidence base around cost effectiveness will  
48 be challenging. The EuroQoL HRQoL measure, EQ-5D-5L (51), is one such measure, but it  
49 can be difficult to show changes in a relatively short timeframe (52) and is quite health  
50  
51  
52  
53  
54  
55  
56  
57  
58  
59  
60

1  
2  
3 focused whereas social prescribing has potentially wider social benefits. The ICECAP-A  
4 (The ICEpop CAPability measure for Adults) is an alternative. (53) It measures capability  
5 well-being, can be used in economic evaluations and is recommended by NICE for use in  
6 evaluations of interventions with potential health and social benefits. (54) Future studies  
7 should consider its inclusion as an outcome. As mentioned previously social connectedness is  
8 another important interim measure to consider. The Medical Research Council Framework  
9 for the Evaluation of Complex Intervention to Improve Health Outcomes recommends  
10 multiple outcome measures. In the case of social prescribing a more refined outcomes  
11 framework with specified measures developed with input from service users, providers and  
12 academics is needed.  
13  
14  
15  
16  
17  
18  
19  
20  
21  
22  
23  
24  
25  
26

27 The widespread policy of rolling out social prescribing projects regardless of the lack of  
28 certainty around cost effectiveness makes it challenging for researchers to address the  
29 evidence gap, especially in identifying suitable controls. While some CBAs in this review  
30 attempted to match controls, there were often significant differences in baseline  
31 characteristics as controls were drawn from different populations. (30, 32) Where social  
32 prescribing has already been adopted by policy makers stepped wedge cluster RCTs and  
33 interrupted time series offer an alternative approach to CBAs and can control better for  
34 confounding. (55) Other jurisdictions considering implementing social prescribing should  
35 carefully consider how they evaluate it from inception. RCTs are feasible as shown by the  
36 trials in the review. They are of course challenging given the tailored nature of social  
37 prescribing link worker interventions, and parallel process evaluations are recommended to  
38 evaluate contextual factors and mechanisms of action, (56), which in turn can inform further  
39 refining of existing programmes. It is clear, however, that further uncontrolled before-after  
40 studies will not advance the evidence base.  
41  
42  
43  
44  
45  
46  
47  
48  
49  
50  
51  
52  
53  
54  
55  
56  
57  
58  
59  
60

## CONCLUSIONS

Our systematic review suggests that link workers providing social prescribing may have little or no impact on HRQoL, mental health or a range of patient reported outcomes though may improve self-rated health. For patients with multimorbidity in areas of deprivation an intensive link worker intervention probably improves patients' ratings of high-quality primary care and reduces hospitalisations, but these findings are based on two studies in the US and require evaluation in other health systems. The opportunity costs of investing in social prescribing link workers are unknown and it is essential that high quality trials determining cost effectiveness are conducted so that the evidence can catch up with the policy and we avoid wasting valuable time and resources.

## CONTRIBUTORS

BK was the primary reviewer and designed and conducted the search, reviewed identified texts, extracted data, performed the narrative synthesis and wrote the main draft. AC was a second reviewer of identified texts and for the quality assessment. MOS performed citation searches, verified data extraction and was second reviewer for certainty of evidence assessment. FB provided statistical support, wrote the protocol for meta-analysis and advised on feasibility of same. EOS provided health economics expertise and advised on



1  
2  
3 identification and summary of cost analysis studies. DC provided input into the search  
4 protocol, in particular descriptions and definitions of the link worker role. SMS  
5 conceptualised the original review questions, was involved in designing methods of the  
6 review and acted as a third reviewer. All authors contributed to critique and revisions of draft  
7 manuscripts and have approved the final version.  
8  
9  
10  
11  
12  
13  
14

## 15 **COMPETING INTERESTS**

16  
17  
18 The authors declare that they have no competing interests.  
19  
20  
21

## 22 **ACKNOWLEDGMENTS**

23  
24 Paul J Murphy MLIS (Information Specialist, Royal College of Surgeons Ireland Library, 26  
25 York Street, D02 YN77) advised on search strategies.  
26  
27  
28  
29

## 30 **ETHICS STATEMENT**

31  
32  
33 This study did not involve human or animal subjects and did not require ethical approval.  
34  
35

## 36 **FUNDING**

37  
38  
39 This research was funded by the Health Research Board Ireland (Grant reference HRB CDA  
40 2018 Reference CDA-2018-003). The funders did not have any role in the design of this  
41 study.  
42  
43  
44  
45  
46

## 47 **DATA AVAILABILITY STATEMENT**

48  
49 Supplementary data are available on the Open Science Framework: Kiely, B. (2022, July 19).  
50 Effect of social prescribing link workers on health outcomes and costs for adults in primary  
51 care and community settings: a systematic review. <https://doi.org/10.17605/OSF.IO/G2Y4C>  
52  
53  
54  
55  
56

57  
58 This project contains the following supplementary data:  
59  
60

- 1
- 2
- 3 • Appendix 1: PRISMA checklist for “A systematic review of the effectiveness of link
- 4 workers providing social prescribing on health outcomes and costs for adults in
- 5 primary care and community settings.”
- 6
- 7
- 8
- 9
- 10 • Appendix 2: Full Search Strategy and Results
- 11
- 12 • Appendix 3: GRIPP 2 Form for PPI
- 13
- 14 • Appendix 4: Risk of Bias tables
- 15
- 16 • Appendix 5: GRADE Assessment Sheets
- 17
- 18 • Appendix 6: All outcomes table
- 19
- 20
- 21

22  
23 Data are available under the terms of the [CC-By Attribution-NonCommercial-NoDerivatives 4.0](https://creativecommons.org/licenses/by-nc-nd/4.0/)  
24 [International](https://creativecommons.org/licenses/by-nc-nd/4.0/).

## REFERENCES

1. Polley MJ, Fleming, J., Anfilogoff, T. and Carpenter, A. Making sense of Social Prescribing. London: Univeristy of Westminster; 2017 18/08/2017.
2. NHS. NHS Careers: Social Prescribing Link worker NHS Careers: NHS; 2021 [Available from: <https://www.healthcareers.nhs.uk/explore-roles/wider-healthcare-team/roles-wider-healthcare-team/clinical-support-staff/social-prescribing-link-worker/social-prescribing-link-worker>].
3. NHS. Social Prescribing England: NHS; 2020 [Available from: <https://www.england.nhs.uk/personalisedcare/social-prescribing/>].
4. Wallace E, Salisbury C, Guthrie B, Lewis C, Fahey T, Smith SM. Managing patients with multimorbidity in primary care. *BMJ*. 2015;350.
5. Payne RA, Abel GA, Guthrie B, Mercer SW. The effect of physical multimorbidity, mental health conditions and socioeconomic deprivation on unplanned admissions to hospital: a retrospective cohort study. *CMAJ : Canadian Medical Association journal = journal de l'Association medicale canadienne*. 2013;185(5):E221-8.
6. Barnett K, Mercer SW, Norbury M, Watt G, Wyke S, Guthrie B. Epidemiology of multimorbidity and implications for health care, research, and medical education: a cross-sectional study. *Lancet*. 2012;380(9836):37-43.
7. Smith SM, Wallace E, Clyne B, Boland F, Fortin M. Interventions for improving outcomes in patients with multimorbidity in primary care and community setting: a systematic review. *Systematic Reviews*. 2021;10(1):271.
8. Husk K, Elston J, Gradinger F, Callaghan L, Asthana S. Social prescribing: where is the evidence? *The British journal of general practice : the journal of the Royal College of General Practitioners*. 2019;69(678):6-7.
9. Drinkwater C, Wildman J, Moffatt S. Social prescribing. *BMJ*. 2019;364:l1285.
10. Bickerdike L, Booth A, Wilson PM, Farley K, Wright K. Social prescribing: less rhetoric and more reality. A systematic review of the evidence. *BMJ Open*. 2017;7(4).
11. Pescheny JV, Randhawa G, Pappas Y. The impact of social prescribing services on service users: a systematic review of the evidence. *Eur J Public Health*. 2020;30(4):664-73.
12. Vidovic D, Reinhardt GY, Hammerton C. Can Social Prescribing Foster Individual and Community Well-Being? A Systematic Review of the Evidence. *International journal of environmental research and public health*. 2021;18(10):5276.
13. Morse DF, Sandhu S, Mulligan K, Tierney S, Polley M, Chiva Giurca B, et al. Global developments in social prescribing. *BMJ Global Health*. 2022;7(5):e008524.
14. Cochrane. Cochrane Effective Practice and Organisation of Care (EPOC): Cochrane; 2017 [Available from: [https://epoc.cochrane.org/sites/epoc.cochrane.org/files/public/uploads/Resources-for-authors2017/what\\_study\\_designs\\_should\\_be\\_included\\_in\\_an\\_epoc\\_review.pdf](https://epoc.cochrane.org/sites/epoc.cochrane.org/files/public/uploads/Resources-for-authors2017/what_study_designs_should_be_included_in_an_epoc_review.pdf)].
15. Moher D, Liberatia A, Tetzlaff J, Altman D. Preferred Reporting Items for Systematic Reviews and Meta-Analyses: The PRISMA Statement. *PLoS Med*. 2009;6(7). [dataset]
16. Kiely B, Croke A, O'Shea M, Boland F, O'Shea E, Connolly D, et al. Effect of social prescribing link workers on health outcomes and costs for adults in primary care and community settings: a systematic review *Open Science Framework*2022 [updated 19.07.22. Available from: <https://doi.org/10.17605/OSF.IO/G2Y4C>].
17. Kiely B CA, O'Shea E et al. . Effectiveness of link workers providing social prescribing on health outcomes and costs for adult patients in primary care and community settings. A protocol for a systematic review of the literature. [version 2; peer review: 2 approved]. . *HRB Open Res* 2020;2(21).
18. Tierney S, Wong G, Mahtani KR. Current understanding and implementation of 'care navigation' across England: a cross-sectional study of NHS clinical commissioning groups. *British Journal of General Practice*. 2019;69(687):e675.

19. Smith S. Interventions for improving outcomes in patients with multimorbidity in primary care and community settings - Smith, SM - 2016 | Cochrane Library. Cochrane Library of Systematic Reviews. 2016.
20. Butler DC, Petterson S, Phillips RL, Bazemore AW. Measures of social deprivation that predict health care access and need within a rural area of primary care service delivery. *Health services research*. 2013;48(2 Pt 1):539-59.
21. Smith SM, Wallace E, Salisbury C, Sasseville M, Bayliss E, Fortin M. A Core Outcome Set for Multimorbidity Research (COSmm). *Ann Fam Med*. 2018;16(2):132-8.
22. Craig P, Dieppe P, Macintyre S, Michie S, Nazareth I, Petticrew M. Developing and evaluating complex interventions: the new Medical Research Council guidance. *BMJ*. 2008;337.
23. Cochrane. Cochrane Effective Practice and Organisation of Care (EPOC) Resources for review authors 2017 [Available from: [epoc.cochrane.org/resources/epoc-resources-review-authors](http://epoc.cochrane.org/resources/epoc-resources-review-authors)].
24. GRADE. Grade Working Group 2019 [Available from: <http://www.gradeworkinggroup.org/>].
25. Clarke M, Clarke SJ, Jagger C. Social Intervention and the Elderly: A Randomized Controlled Trial. *American Journal of Epidemiology*. 1992;136(12):1517-23.
26. Grant C, Goodenough T, Harvey I, Hine C. A randomised controlled trial and economic evaluation of a referrals facilitator between primary care and the voluntary sector. *BMJ*. 2000;320.
27. Kangovi S, Mitra N, Gr, e D, Huo HR, Smith RA, et al. Community Health Worker Support for Disadvantaged Patients With Multiple Chronic Diseases: A Randomized Clinical Trial. *American Journal of Public Health*. 107(10):1660-7.
28. Kangovi S, Mitra N, Norton L, Harte R, Zhao X, Carter T, et al. Effect of Community Health Worker Support on Clinical Outcomes of Low-Income Patients Across Primary Care Facilities: a Randomized Clinical Trial. *JAMA internal medicine*. 2018;178(12):1635-43.
29. Heisler M, Lapidus A, Kieffer E, Henderson J, Guzman R, Cunmulaj J, et al. Impact on Health Care Utilization and Costs of a Medicaid Community Health Worker Program in Detroit, 2018–2020: A Randomized Program Evaluation. *American Journal of Public Health*. 2022;112(5):766-75.
30. Dickens AP, Richards SH, Hawton A, Taylor RS, Greaves CJ, Green C, et al. An evaluation of the effectiveness of a community mentoring service for socially isolated older people: a controlled trial. *BMC public health*. 2011;11:218-.
31. Mercer SW, Fitzpatrick B, Grant L, Chng NR, McConnachie A, Bakhshi A, et al. Effectiveness of Community-Links Practitioners in Areas of High Socioeconomic Deprivation. *Ann Fam Med*. 2019;17(6):518-25.
32. Carnes D, Sohanpal R, Frostick C, Hull S, Mathur R, Netuveli G, et al. The impact of a social prescribing service on patients in primary care: a mixed methods evaluation. *BMC Health Services Research*. 2017;17:1-9.
33. Kangovi S, Mitra N, Grande D, Long JA, Asch DA. Evidence-Based Community Health Worker Program Addresses Unmet Social Needs And Generates Positive Return On Investment. *Health Affairs*. 2020;39(2):207-13.
34. Kangovi S, Carter T, Charles D, Smith RA, Glanz K, Long JA, et al. Toward A Scalable, Patient-Centered Community Health Worker Model: Adapting the IMPACT Intervention for Use in the Outpatient Setting. *Popul Health Manag*. 2016;19(6):380-8.
35. Reinhardt GY, Vidovic D, Hammerton C. Understanding loneliness: a systematic review of the impact of social prescribing initiatives on loneliness. *Perspectives in Public Health*. 2021;141(4):204-13.
36. Salisbury C, Man MS, Bower P, Guthrie B, Chaplin K, Gaunt DM, et al. Management of multimorbidity using a patient-centred care model: a pragmatic cluster-randomised trial of the 3D approach. *Lancet*. 2018;392(10141):41-50.
37. Dowrick C. Patient-centred care for multimorbidity: an end in itself? *Lancet*. 2018;392(10141):4-5.
38. Thomas G, Lynch M, Spencer LH. A Systematic Review to Examine the Evidence in Developing Social Prescribing Interventions That Apply a Co-Productive, Co-Designed Approach to

- 1  
2  
3 Improve Well-Being Outcomes in a Community Setting. *International journal of environmental*  
4 *research and public health*. 2021;18(8):3896.
- 5 39. Tierney S, Wong G, Roberts N, Boylan A-M, Park S, Abrams R, et al. Supporting social  
6 prescribing in primary care by linking people to local assets: a realist review. *BMC medicine*.  
7 2020;18(1):49.
- 8 40. Kellezi B, Wakefield JRH, Stevenson C, McNamara N, Mair E, Bowe M, et al. The social cure of  
9 social prescribing: a mixed-methods study on the benefits of social connectedness on quality and  
10 effectiveness of care provision. *Bmj Open*. 2019;9(11).
- 11 41. Maughan DL, Patel A, Parveen T, Braithwaite I, Cook J, Lillywhite R, et al. Primary-care-based  
12 social prescribing for mental health: an analysis of financial and environmental sustainability. *Prim*  
13 *Health Care Res Dev*. 2016;17(2):114-21.
- 14 42. Foster A, Thompson J, Holding E, Ariss S, Mukuria C, Jacques R, et al. Impact of social  
15 prescribing to address loneliness: A mixed methods evaluation of a national social prescribing  
16 programme. *Health & Social Care in the Community*. 2021;29(5):1439-49.
- 17 43. Embick ER, Maeng DD, Juskiewicz I, Cerulli C, Crean HF, Wittink M, et al. Demonstrated  
18 health care cost savings for women: findings from a community health worker intervention designed  
19 to address depression and unmet social needs. *Archives of women's mental health*. 2020.
- 20 44. Costa A, Sousa C, Seabra PRC, Virgolino A, Santos O, Lopes J, et al. Effectiveness of Social  
21 Prescribing Programs in the Primary Health-Care Context: A Systematic Literature Review. .  
22 *Sustainability* 2021;13(2731).
- 23 45. Kiely B, Clyne B, Boland F, Donnell P, Connolly D, Shea E, et al. Link workers providing social  
24 prescribing and health and social care coordination for people with multimorbidity in socially  
25 deprived areas (the LinkMM trial): protocol for a pragmatic randomised controlled trial. *BMJ Open*.  
26 2021;11(2):e041809.
- 27 46. NHS. NHS Long Term Plan: NHS; 2019 [Available from: <https://www.longtermplan.nhs.uk>].
- 28 47. HSE. HSE Social Prescribing Framework 2021 [Available from:  
29 <https://www.hse.ie/eng/about/who/healthwellbeing/our-priority-programmes/mental-health-and-wellbeing/hse-social-prescribing-framework.pdf>].
- 30 48. HSE. Building the capacity for the evaluation of social prescribing. Evaluability assessment. :  
31 HSE; 2020 [Available from: <https://www.hse.ie/eng/about/who/healthwellbeing/our-priority-programmes/mental-health-and-wellbeing/building-capacity-for-the-evaluation-of-social-prescribing-evaluability-assessment.pdf>].
- 32 49. Tierney S, Mahtani KR. Understanding the implementation of link workers in primary care: A  
33 realist evaluation to inform current and future policy: NIHR; 2021 [Available from:  
34 <https://fundingawards.nihr.ac.uk/award/NIHR130247>].
- 35 50. Morris SL, Gibson K, Wildman JM, Griffith B, Moffatt S, Pollard TM. Social prescribing during  
36 the COVID-19 pandemic: a qualitative study of service providers' and clients' experiences. *BMC*  
37 *Health Services Research*. 2022;22(1):258.
- 38 51. Gusi N, Olivares PR, Rajendram R. The EQ-5D Health-Related Quality of Life Questionnaire.  
39 In: Preedy VR, Watson RR, editors. *Handbook of Disease Burdens and Quality of Life Measures*. New  
40 York, NY: Springer New York; 2010. p. 87-99.
- 41 52. Fortin M, Stewart M, Ngangue P, Almirall J, Bélanger M, Brown JB, et al. Scaling Up Patient-  
42 Centered Interdisciplinary Care for Multimorbidity: A Pragmatic Mixed-Methods Randomized  
43 Controlled Trial. *Ann Fam Med*. 2021;19(2):126-34.
- 44 53. Al-Janabi H, N Flynn T, Coast J. Development of a self-report measure of capability wellbeing  
45 for adults: the ICECAP-A. *Quality of Life Research*. 2012;21(1):167-76.
- 46 54. NICE. Developing NICE Guidelines: the manual London: National Institute for Health and  
47 Care Excellence; 2014 [updated 15/10/2020. Available from:  
48 <https://www.nice.org.uk/process/pmg20/chapter/incorporating-economic-evaluation>].
- 49 55. Schünemann HJ, Cuello C, Akl EA, Mustafa RA, Meerpohl JJ, Thayer K, et al. GRADE  
50 guidelines: 18. How ROBINS-I and other tools to assess risk of bias in nonrandomized studies should  
51  
52  
53  
54  
55  
56  
57  
58  
59  
60

1  
2  
3 be used to rate the certainty of a body of evidence. Journal of clinical epidemiology. 2019;111:105-  
4 14.

5 56. Moore GF, Audrey S, Barker M, Bond L, Bonell C, Hardeman W, et al. Process evaluation of  
6 complex interventions: Medical Research Council guidance. BMJ : British Medical Journal.  
7 2015;350:h1258.  
8  
9

10  
11  
12  
13  
14 **FIGURE TITLES**

15  
16  
17 **Figure 1. PRISMA flow diagram**

18  
19  
20  
21 **Figure 2. Risk of bias summary**  
22  
23  
24  
25  
26  
27  
28  
29  
30  
31  
32  
33  
34  
35  
36  
37  
38  
39  
40  
41  
42  
43  
44  
45  
46  
47  
48  
49  
50  
51  
52  
53  
54  
55  
56  
57  
58  
59  
60

Figure 1 PRISMA flow diagram

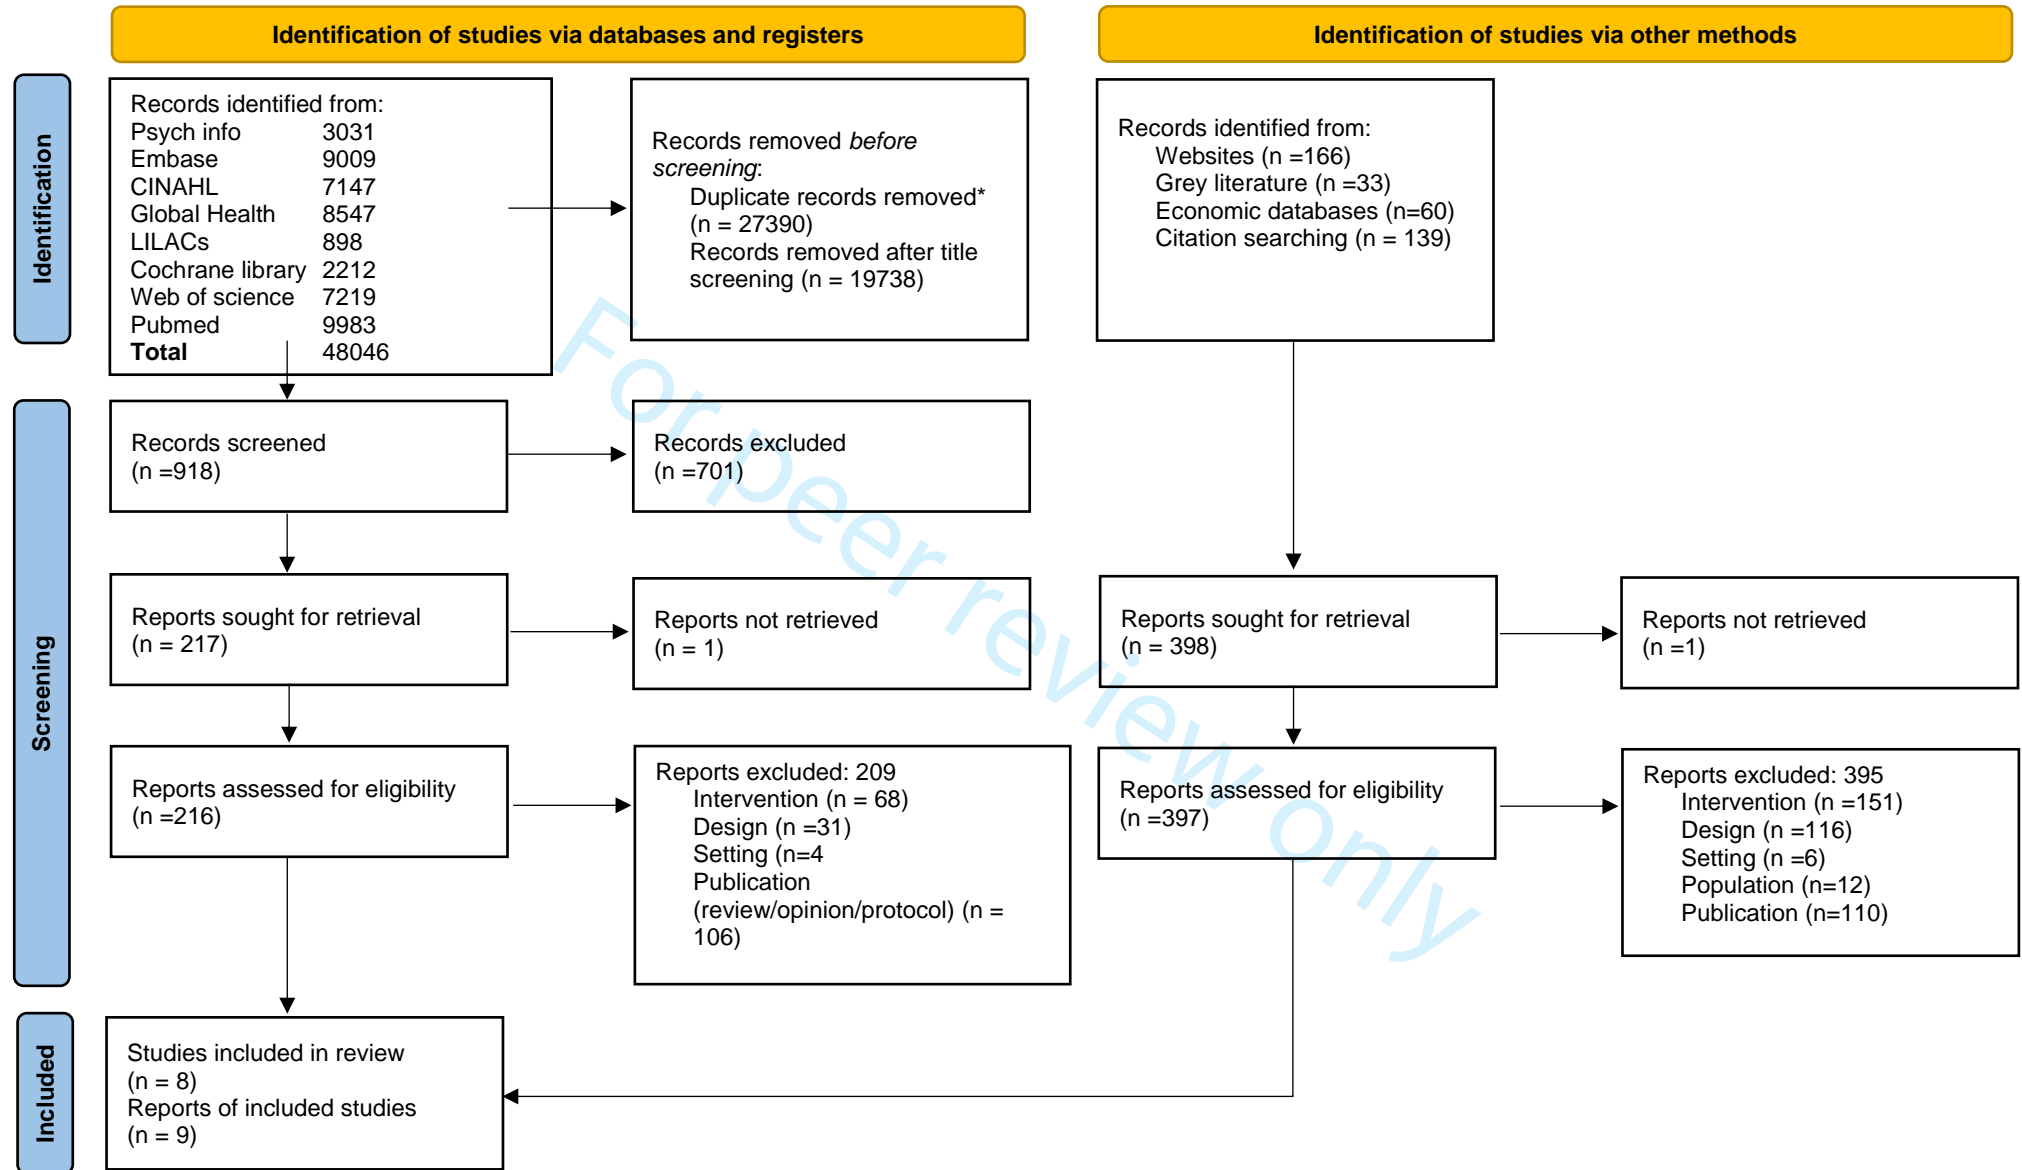

\*Duplicates were removed using EndNote Find Duplicate function

Figure 2. Risk of Bias Summary

|                                                                      |  |
|----------------------------------------------------------------------|--|
| <b>Random sequence generation</b>                                    |  |
| <b>Allocation concealment</b>                                        |  |
| <b>Baseline outcome measurements similar</b>                         |  |
| <b>Baseline characteristics similar</b>                              |  |
| <b>Incomplete outcome data</b>                                       |  |
| <b>Knowledge of the allocated interventions adequately prevented</b> |  |
| <b>Protection against contamination</b>                              |  |
| <b>Selective outcome reporting</b>                                   |  |
| <b>Other risks of bias</b>                                           |  |

For peer review only



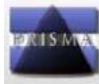

## PRISMA 2020 Checklist

| Section and Topic             | Item # | Checklist item                                                                                                                                                                                                                                                                                       | Location where item is reported |
|-------------------------------|--------|------------------------------------------------------------------------------------------------------------------------------------------------------------------------------------------------------------------------------------------------------------------------------------------------------|---------------------------------|
| <b>TITLE</b>                  |        |                                                                                                                                                                                                                                                                                                      |                                 |
| Title                         | 1      | Identify the report as a systematic review.                                                                                                                                                                                                                                                          | Page 1                          |
| <b>ABSTRACT</b>               |        |                                                                                                                                                                                                                                                                                                      |                                 |
| Abstract                      | 2      | See the PRISMA 2020 for Abstracts checklist.                                                                                                                                                                                                                                                         | Page 3                          |
| <b>INTRODUCTION</b>           |        |                                                                                                                                                                                                                                                                                                      |                                 |
| Rationale                     | 3      | Describe the rationale for the review in the context of existing knowledge.                                                                                                                                                                                                                          | Page 6                          |
| Objectives                    | 4      | Provide an explicit statement of the objective(s) or question(s) the review addresses.                                                                                                                                                                                                               | Page 6                          |
| <b>METHODS</b>                |        |                                                                                                                                                                                                                                                                                                      |                                 |
| Eligibility criteria          | 5      | Specify the inclusion and exclusion criteria for the review and how studies were grouped for the syntheses.                                                                                                                                                                                          | Page 7                          |
| Information sources           | 6      | Specify all databases, registers, websites, organisations, reference lists and other sources searched or consulted to identify studies. Specify the date when each source was last searched or consulted.                                                                                            | Page 10 and Appendix 2          |
| Search strategy               | 7      | Present the full search strategies for all databases, registers and websites, including any filters and limits used.                                                                                                                                                                                 | Appendix 2                      |
| Selection process             | 8      | Specify the methods used to decide whether a study met the inclusion criteria of the review, including how many reviewers screened each record and each report retrieved, whether they worked independently, and if applicable, details of automation tools used in the process.                     | Page 11                         |
| Data collection process       | 9      | Specify the methods used to collect data from reports, including how many reviewers collected data from each report, whether they worked independently, any processes for obtaining or confirming data from study investigators, and if applicable, details of automation tools used in the process. | Page 12                         |
| Data items                    | 10a    | List and define all outcomes for which data were sought. Specify whether all results that were compatible with each outcome domain in each study were sought (e.g. for all measures, time points, analyses), and if not, the methods used to decide which results to collect                         | Page 9                          |
|                               | 10b    | List and define all other variables for which data were sought (e.g. participant and intervention characteristics, funding sources). Describe any assumptions made about any missing or unclear information.                                                                                         | Page 10                         |
| Study risk of bias assessment | 11     | Specify the methods used to assess risk of bias in the included studies, including details of the tool(s) used, how many reviewers assessed each study and whether they worked independently, and if applicable, details of automation tools used in the process.                                    | Page 12                         |
| Effect measures               | 12     | Specify for each outcome the effect measure(s) (e.g. risk ratio, mean difference) used in the synthesis or presentation of results.                                                                                                                                                                  | Page 23                         |
| Synthesis methods             | 13a    | Describe the processes used to decide which studies were eligible for each synthesis (e.g. tabulating the study intervention characteristics and comparing against the planned groups for each synthesis (item #5)).                                                                                 | Page 12                         |
|                               | 13b    | Describe any methods required to prepare the data for presentation or synthesis, such as handling of missing summary statistics, or data conversions.                                                                                                                                                | N/A                             |
|                               | 13c    | Describe any methods used to tabulate or visually display results of individual studies and syntheses.                                                                                                                                                                                               | Page 12                         |
|                               | 13d    | Describe any methods used to synthesize results and provide a rationale for the choice(s). If meta-analysis was performed, describe the model(s), method(s) to identify the presence and extent of statistical heterogeneity, and software package(s) used.                                          | Page 12                         |
|                               | 13e    | Describe any methods used to explore possible causes of heterogeneity among study results (e.g. subgroup analysis, meta-regression).                                                                                                                                                                 | N/A                             |
|                               | 13f    | Describe any sensitivity analyses conducted to assess robustness of the synthesized results.                                                                                                                                                                                                         | N/A                             |



## PRISMA 2020 Checklist

| Section and Topic             | Item # | Checklist item                                                                                                                                                                                                                                                                       | Location where item is reported                         |
|-------------------------------|--------|--------------------------------------------------------------------------------------------------------------------------------------------------------------------------------------------------------------------------------------------------------------------------------------|---------------------------------------------------------|
| Reporting bias assessment     | 14     | Describe any methods used to assess risk of bias due to missing results in a synthesis (arising from reporting biases).                                                                                                                                                              | Page 12                                                 |
| Certainty assessment          | 15     | Describe any methods used to assess certainty (or confidence) in the body of evidence for an outcome.                                                                                                                                                                                | Page 12                                                 |
| <b>RESULTS</b>                |        |                                                                                                                                                                                                                                                                                      |                                                         |
| Study selection               | 16a    | Describe the results of the search and selection process, from the number of records identified in the search to the number of studies included in the review, ideally using a flow diagram.                                                                                         | Page 13                                                 |
|                               | 16b    | Cite studies that might appear to meet the inclusion criteria, but which were excluded, and explain why they were excluded.                                                                                                                                                          | Page 29                                                 |
| Study characteristics         | 17     | Cite each included study and present its characteristics.                                                                                                                                                                                                                            | Page 17                                                 |
| Risk of bias in studies       | 18     | Present assessments of risk of bias for each included study.                                                                                                                                                                                                                         | Page 20 and Appendix 4                                  |
| Results of individual studies | 19     | For all outcomes, present, for each study: (a) summary statistics for each group (where appropriate) and (b) an effect estimate and its precision (e.g. confidence/credible interval), ideally using structured tables or plots.                                                     | Table 3, Page 23 and see Appendix 6                     |
| Results of syntheses          | 20a    | For each synthesis, briefly summarise the characteristics and risk of bias among contributing studies.                                                                                                                                                                               | Page 21, GRADE Summary of findings table and Appendix 5 |
|                               | 20b    | Present results of all statistical syntheses conducted. If meta-analysis was done, present for each the summary estimate and its precision (e.g. confidence/credible interval) and measures of statistical heterogeneity. If comparing groups, describe the direction of the effect. | N/A                                                     |
|                               | 20c    | Present results of all investigations of possible causes of heterogeneity among study results.                                                                                                                                                                                       | N/A                                                     |
|                               | 20d    | Present results of all sensitivity analyses conducted to assess the robustness of the synthesized results.                                                                                                                                                                           | N/A                                                     |
| Reporting biases              | 21     | Present assessments of risk of bias due to missing results (arising from reporting biases) for each synthesis assessed.                                                                                                                                                              | Page 21                                                 |
| Certainty of evidence         | 22     | Present assessments of certainty (or confidence) in the body of evidence for each outcome assessed.                                                                                                                                                                                  | Page 21 and see Appendix 5 GRADE assessment tables      |
| <b>DISCUSSION</b>             |        |                                                                                                                                                                                                                                                                                      |                                                         |
| Discussion                    | 23a    | Provide a general interpretation of the results in the context of other evidence.                                                                                                                                                                                                    | Page 28                                                 |
|                               | 23b    | Discuss any limitations of the evidence included in the review.                                                                                                                                                                                                                      | Page 28                                                 |



## PRISMA 2020 Checklist

| Section and Topic                              | Item # | Checklist item                                                                                                                                                                                                                             | Location where item is reported |
|------------------------------------------------|--------|--------------------------------------------------------------------------------------------------------------------------------------------------------------------------------------------------------------------------------------------|---------------------------------|
|                                                | 23c    | Discuss any limitations of the review processes used.                                                                                                                                                                                      | Page 29                         |
|                                                | 23d    | Discuss implications of the results for practice, policy, and future research.                                                                                                                                                             | Page 30                         |
| <b>OTHER INFORMATION</b>                       |        |                                                                                                                                                                                                                                            |                                 |
| Registration and protocol                      | 24a    | Provide registration information for the review, including register name and registration number, or state that the review was not registered.                                                                                             | Page 3                          |
|                                                | 24b    | Indicate where the review protocol can be accessed, or state that a protocol was not prepared.                                                                                                                                             | Page 7                          |
|                                                | 24c    | Describe and explain any amendments to information provided at registration or in the protocol.                                                                                                                                            | N/A                             |
| Support                                        | 25     | Describe sources of financial or non-financial support for the review, and the role of the funders or sponsors in the review.                                                                                                              | Page 34                         |
| Competing interests                            | 26     | Declare any competing interests of review authors.                                                                                                                                                                                         | Page 34                         |
| Availability of data, code and other materials | 27     | Report which of the following are publicly available and where they can be found: template data collection forms; data extracted from included studies; data used for all analyses; analytic code; any other materials used in the review. | Page 34                         |

From: Page MJ, McKenzie JE, Bossuyt PM, Boutron I, Hoffmann TC, Mulrow CD, et al. The PRISMA 2020 statement: an updated guideline for reporting systematic reviews. *BMJ* 2021;372:n71. doi: 10.1136/bmj.n71

For more information, visit: <http://www.prisma-statement.org/>

Effect of social prescribing link workers on health outcomes and costs for adults in primary care and community settings. A systematic review.

|    | PubMed<br>21/07/2021                                        | Items |
|----|-------------------------------------------------------------|-------|
| 1  | "wellbeing program*"                                        | 59    |
| 2  | "community health advisor*"                                 | 95    |
| 3  | "community health worker*"                                  | 8536  |
| 4  | "community facilitator*"                                    | 48    |
| 5  | "community navigator*"                                      | 17    |
| 6  | "community referral*"                                       | 186   |
| 7  | "lay health worker*"                                        | 421   |
| 8  | "link-worker*"                                              | 85    |
| 9  | "link worker*"                                              | 85    |
| 10 | "linkworker*"                                               | 26    |
| 11 | "patient navigator*"                                        | 584   |
| 12 | "social prescri*"                                           | 240   |
| 13 | 1 OR 2 OR 3 OR 4 OR 5 OR 6 OR 7 OR 8 OR 9 OR 10 OR 11 OR 12 | 9983  |

|    | EMBASE on Embase.com<br>21/07/2021                          | Items |
|----|-------------------------------------------------------------|-------|
| 1  | 'wellbeing program*'                                        | 234   |
| 2  | 'community health advisor*'                                 | 11    |
| 3  | 'community health worker*'                                  | 6272  |
| 4  | 'community facilitator*'                                    | 65    |
| 5  | 'community navigator*'                                      | 44    |
| 6  | 'community referral*'                                       | 324   |
| 7  | 'lay health worker*'                                        | 554   |
| 8  | 'link-worker*'                                              | 105   |
| 9  | 'link worker*'                                              | 105   |
| 10 | 'linkworker*'                                               | 23    |
| 11 | 'patient navigator*'                                        | 1225  |
| 12 | 'social prescri*'                                           | 284   |
| 13 | 1 OR 2 OR 3 OR 4 OR 5 OR 6 OR 7 OR 8 OR 9 OR 10 OR 11 OR 12 | 9009  |

|   | CINAHL on Ebscohost<br>22/07/2021                                                                                                                                                                                                                                                         | Items |
|---|-------------------------------------------------------------------------------------------------------------------------------------------------------------------------------------------------------------------------------------------------------------------------------------------|-------|
| 1 | social N1 prescri* OR patient N1 navigator* OR linkworker* OR link N1 worker* OR lay N1 health N1 worker* OR community N1 referral* OR community N1 navigator* OR community N1 facilitator* OR community N1 health N1 worker* OR community N1 health N1 advisor* OR wellbeing N1 program* | 7147  |

|   | PSYCHINFO on Ebscohost<br>22/07/2021                                                                                                                                                                                                                                                      | Items |
|---|-------------------------------------------------------------------------------------------------------------------------------------------------------------------------------------------------------------------------------------------------------------------------------------------|-------|
| 1 | social N1 prescri* OR patient N1 navigator* OR linkworker* OR link N1 worker* OR lay N1 health N1 worker* OR community N1 referral* OR community N1 navigator* OR community N1 facilitator* OR community N1 health N1 worker* OR community N1 health N1 advisor* OR wellbeing N1 program* | 3031  |

|   |                                                                                                                                                                                                                                                                                                                                                 |       |
|---|-------------------------------------------------------------------------------------------------------------------------------------------------------------------------------------------------------------------------------------------------------------------------------------------------------------------------------------------------|-------|
|   |                                                                                                                                                                                                                                                                                                                                                 |       |
|   | WEB OF SCIENCE, Science & Social Science Citation Indexes on Clarivate<br>22/07/2021                                                                                                                                                                                                                                                            | Items |
| 1 | TS=(social NEAR/1 prescri* OR patient NEAR/1 navigator* OR linkworker* link NEAR/1 worker* OR lay NEAR/1 health NEAR/1 worker* OR community NEAR/1 referral* OR community NEAR/1 navigator* OR community NEAR/1 facilitator* OR community NEAR/1 health NEAR/1 worker* OR community NEAR/1 health NEAR/1 advisor* OR wellbeing NEAR/1 program*) | 7548  |
| 2 | Limit 1 to articles, meeting, conference abstracts                                                                                                                                                                                                                                                                                              | 7219  |

|   |                                                                                                                                                                                  |       |
|---|----------------------------------------------------------------------------------------------------------------------------------------------------------------------------------|-------|
|   | COCHRANE LIBRARY and Central Registry of Clinical Trials<br>22/07/2021                                                                                                           | Items |
| 1 | wellbeing NEAR/1 program*:ti,ab,kw                                                                                                                                               | 65    |
| 2 | (community NEAR/1 health NEAR/1 advisor* OR community NEAR/1 health NEAR/1 worker*):ti,ab,kw                                                                                     | 1691  |
| 3 | (community NEAR/1 facilitator*OR community NEAR/1 navigator* OR community NEAR/1 referral):ti,ab,kw                                                                              | 21    |
| 4 | (lay NEAR/1 health NEAR/1 worker* OR link NEAR/1 worker* OR linkworker*):ti,ab,kw                                                                                                | 206   |
| 5 | patient NEAR/1 navigator*:ti,ab,kw                                                                                                                                               | 286   |
| 6 | social NEAR/1 prescri*:ti,ab,kw                                                                                                                                                  | 20    |
| 7 | 1 OR 2 OR 3 OR 4 OR 5 OR 6                                                                                                                                                       | 2212  |
|   | <i>The Central Registry of Clinical Trials result now includes trials data from Clinical Trials.gov [230] and WHO International Clinical Trials Registry Platform ICTRP [26]</i> |       |

|   |                                                                                                                                                                                                                                                                                                                                                                                                                                                                                                                      |       |
|---|----------------------------------------------------------------------------------------------------------------------------------------------------------------------------------------------------------------------------------------------------------------------------------------------------------------------------------------------------------------------------------------------------------------------------------------------------------------------------------------------------------------------|-------|
|   | Global Health on OVID<br>22/07/2021                                                                                                                                                                                                                                                                                                                                                                                                                                                                                  |       |
| 1 | (wellbeing program OR wellbeing programs OR community health advisor OR community health advisors OR community health worker OR community health workers OR community facilitator OR community facilitators OR community navigator OR community navigators OR community referral OR lay health worker OR lay health workers OR link worker OR link workers OR linkworker OR linkworkers OR patient navigator OR patient navigators OR social prescribing OR social prescription).ti,ab.                              | 8547  |
|   | EU Clinical Trials Register <a href="https://www.clinicaltrialsregister.eu/ctr-search/search">https://www.clinicaltrialsregister.eu/ctr-search/search</a><br>22/07/2021                                                                                                                                                                                                                                                                                                                                              | Items |
| 1 | "wellbeing program" OR "wellbeing programs" OR "community health advisor" OR "community health advisors" OR "community health worker" OR "community health workers" OR "community facilitator" OR "community facilitators" OR "community navigator" OR "community navigators" OR "community referral" OR "lay health worker" OR "lay health workers" OR "link worker" OR "link workers" OR linkworker OR linkworkers OR "patient navigator" OR "patient navigators" OR "social prescribing" OR "social prescription" | 0     |

|  |                                                                                                                                                                                                               |   |
|--|---------------------------------------------------------------------------------------------------------------------------------------------------------------------------------------------------------------|---|
|  | LILACS <a href="http://lilacs.bvsalud.org/en/">http://lilacs.bvsalud.org/en/</a><br>22/07/2021                                                                                                                |   |
|  | wellbeing program* OR community health advisor OR community health advisor* OR community health worker* OR community facilitator* OR community navigator*OR lay health worker* OR link worker* OR linkworker* | 0 |

1  
2  
3  
4  
5  
6  
7  
8  
9  
10  
11  
12  
13  
14  
15  
16  
17  
18  
19  
20  
21  
22  
23  
24  
25  
26  
27  
28  
29  
30  
31  
32  
33  
34  
35  
36  
37  
38  
39  
40  
41  
42  
43  
44  
45  
46  
47  
48  
49  
50  
51  
52  
53  
54  
55  
56  
57  
58  
59  
60

|  |                                             |  |
|--|---------------------------------------------|--|
|  | OR patient navigator* OR social prescribing |  |
|--|---------------------------------------------|--|

For peer review only

## Summary of records retrieved from other sources

**Grey literature search for** Effect of link workers providing social prescribing on health outcomes and costs for adults in primary care and community settings: a systematic review".

**Completed September 2021, updated July 2022**

### 1. Search of Websites

Relevant websites were searched manually for a social prescribing section or publications section. If a search engine was available for these sections the search term "social prescribing" and "link worker" were used. Publications listed were reviewed by title/summary for relevant evaluations. Websites were searched sequentially so reports identified previously were not retrieved from subsequent website searches. Websites were searched in September 2021, except for the Kings fund library and Social Prescribing Network resources, which were updated in June 2022.

**2. Grey literature search Engines** were searched using terms "link worker" and "social prescribing".

### 3. Google

Google Search term "Social prescribing"

Returned 29, 800, 000

23 pages results reviewed until results repeated or irrelevant

21 web pages visited.

9 evaluations of social prescribing retrieved. All were unpublished evaluations conducted for Clinical Commissioning Groups with no controls.

1 full report was not retrieved, despite email contact with the relevant CCG.

Rest were descriptive pages of services

### 4. Google Scholar

Search term "Social prescribing"

774, 000 results, up to page 37, 21 new potentially relevant reports retrieved. 0 titles added. 3 protocols, 12 design, 3 reviews, 2 wrong intervention, 1 population.

### 5. Economic Search

CEA registry (<https://cear.tuftsmedicalcenter.org/>) and York Centre for Reviews and Dissemination (<https://www.crd.york.ac.uk/CRDWeb/ResultsPage.asp>) search engines were searched with key words "wellbeing program OR wellbeing programs OR community health advisor OR community health advisors OR community health worker OR community health workers OR community facilitator OR community facilitators OR community navigator OR community navigators OR community referral OR lay health worker OR lay health workers OR link worker OR link workers OR linkworker OR linkworkers OR patient navigator OR patient navigators OR social prescribing OR social prescription".

Table 1: Details of Grey literature search including reasons retrieved reports were excluded

| Reasons not included                  |                  |                  |           |              |             |            |                  |               |          |
|---------------------------------------|------------------|------------------|-----------|--------------|-------------|------------|------------------|---------------|----------|
|                                       | Results returned | Records reviewed | Design    | Intervention | Publication | Population | Already included | Not retrieved | Setting  |
| <b>Websites</b>                       |                  |                  |           |              |             |            |                  |               |          |
| Kings Fund                            | 77               | 77               | 17        | 11           | 48          |            | 1                |               |          |
| Social Prescribing Network            | 69               | 69               | 19        | 14           | 32          | 3          |                  |               | 1        |
| HSE Social Prescribing                | 3                | 1                | 1         |              |             |            |                  |               |          |
| ESRI                                  | 2                | 0                |           |              |             |            |                  |               |          |
| NHS                                   | 0                |                  |           |              |             |            |                  |               |          |
| Social Prescribing Academy            | 0                |                  |           |              |             |            |                  |               |          |
| Health Foundation                     | 3                | 3                | 2         | 1            |             |            |                  |               |          |
| Nuffield Trust                        | 1                | 1                | 1         |              |             |            |                  |               |          |
| Oxford Social Prescribing Network     | 5                | 5                | 3         | 1            | 1           |            |                  |               |          |
| NICE                                  | 136              | 11               | 8         |              | 3           |            |                  |               |          |
| <b>Total=</b>                         | <b>296</b>       | <b>167</b>       | <b>51</b> | <b>27</b>    | <b>84</b>   | <b>3</b>   | <b>1</b>         |               | <b>1</b> |
| <b>Grey literature search engines</b> |                  |                  |           |              |             |            |                  |               |          |
| HSE Lenus                             | 44               | 0                |           |              |             |            |                  |               |          |
| Rian                                  | 2                | 2                | 1         |              | 1           |            |                  |               |          |
| DART Europe                           | 2                | 0                |           |              |             |            |                  |               |          |
| Open Grey                             | 2                | 1                | 1         |              |             |            |                  |               |          |
| WHOLIS                                | 0                |                  |           |              |             |            |                  |               |          |
| Google                                | N/A              | 9                | 8         |              |             |            |                  |               | 1        |
| Google Scholar                        | N/A              | 21               | 12        | 2            | 6           | 1          |                  |               |          |
| <b>Total=</b>                         | <b>50</b>        | <b>33</b>        | <b>22</b> | <b>2</b>     | <b>7</b>    | <b>1</b>   | <b>0</b>         | <b>1</b>      | <b>0</b> |
| <b>Economic Search Engines</b>        |                  |                  |           |              |             |            |                  |               |          |
| CEA Register                          | 33               | 33               |           | 30           |             | 3          |                  |               |          |
| CRD York                              | 27               | 27               |           | 17           | 6           | 4          |                  |               |          |
| <b>Total=</b>                         | <b>60</b>        | <b>60</b>        |           | <b>47</b>    | <b>6</b>    | <b>7</b>   |                  |               |          |

### Citation Searches

1. Systematic reviews identified in the search were reviewed to identify any additional evaluations referenced or included in the review.
2. Backward citation search was conducted by reviewing references of included articles.
3. Forward citation search was conducted using Web of Science and updated in June 2022.
4. Citation searches were conducted independently by BK and MOS and any discrepancies agreed through discussion.

Table 2: Details of Citation Searches included number records reviewed from each source and reasons excluded.

| Citation searches | Systematic Reviews | Backward  | Forward   | Total      |
|-------------------|--------------------|-----------|-----------|------------|
| Intervention      | 43                 | 5         | 27        | 75         |
| Setting           | 2                  |           | 3         | 5          |
| Design            | 17                 | 5         | 21        | 43         |
| Publication       | 3                  |           | 9         | 12         |
| Population        | 0                  | 1         | 1         | 2          |
| Other             |                    |           | 1         | 1          |
| <b>Total</b>      | <b>65</b>          | <b>11</b> | <b>62</b> | <b>138</b> |



Table 2 Public Patient Involvement reported according to Guidance for Reporting Involvement of Patients and the Public (GRIPP) 2 Short Form

|                                                                                                                                                                                                                                                                                                                                                                                                                                                                                                                                                                                                                                                                                                                                                                                                                                                                                                                                                                                                                                                                                                                                              |
|----------------------------------------------------------------------------------------------------------------------------------------------------------------------------------------------------------------------------------------------------------------------------------------------------------------------------------------------------------------------------------------------------------------------------------------------------------------------------------------------------------------------------------------------------------------------------------------------------------------------------------------------------------------------------------------------------------------------------------------------------------------------------------------------------------------------------------------------------------------------------------------------------------------------------------------------------------------------------------------------------------------------------------------------------------------------------------------------------------------------------------------------|
| <b>1: Aim</b>                                                                                                                                                                                                                                                                                                                                                                                                                                                                                                                                                                                                                                                                                                                                                                                                                                                                                                                                                                                                                                                                                                                                |
| The aim of the PPI was to provide the perspective of people living with multimorbidity on the implications of the results of a systematic review on the effectiveness of social prescribing link workers.                                                                                                                                                                                                                                                                                                                                                                                                                                                                                                                                                                                                                                                                                                                                                                                                                                                                                                                                    |
| <b>2: Methods</b>                                                                                                                                                                                                                                                                                                                                                                                                                                                                                                                                                                                                                                                                                                                                                                                                                                                                                                                                                                                                                                                                                                                            |
| <p>An advisory panel of six people living with multimorbidity was recruited via existing networks of students on a PhD program in multimorbidity. The panel meets quarterly to provide input on issues brought to them by the PhD students. The members are voluntary but receive a voucher to acknowledge their time and associated costs attending. The panel had been meeting for three years prior to providing input on this study. The meeting at which this study was discussed took place online, lasted two hours in total including a break and was facilitated by BK and 2 other PhD students on the multimorbidity PhD program. There was one hour dedicated to discuss the systematic review with them.</p> <p>The group received a 500 word plain language summary of the findings of the systematic review one week in advance of the meeting. BK also summarised the methods and findings in a powerpoint presentation during the meeting. The group divided into small groups and discussed the implications for practice, policy and future research and fed back to a plenary discussion afterwards.</p>                  |
| <b>3: Study results</b>                                                                                                                                                                                                                                                                                                                                                                                                                                                                                                                                                                                                                                                                                                                                                                                                                                                                                                                                                                                                                                                                                                                      |
| The group were surprised about the limited evidence and wondered if the outcomes had been appropriate or asked in the right way. They agreed that quality of life was a good overall outcome and felt hospitalisations would matter from the taxpayer perspective. Determining a set of outcomes was felt to be beyond the time available and we agreed it would involve a separate piece of research work. As individuals they did not feel that social prescribing needed to be presented as an experimental intervention, as many interventions or medications may not work for an individual and they felt their healthcare provider would recommend what they thought might work for them, but acknowledged this wasn't guaranteed in the case of social prescribing. They felt policy makers should roll social prescribing out on a pilot basis over a number of years and evaluate it along the way. In terms of targeting specific groups the PPI group felt that social prescribing should be available to whoever might need it, but that it would have to be flexible to allow longer support for those with more complex needs. |

Table 2 Public Patient Involvement reported according to Guidance for Reporting Involvement of Patients and the Public (GRIPP) 2 Short Form

**4: Discussion and conclusions**

The group clearly came to the meeting with a positive perception of social prescribing and felt it was a great idea that should be tested. Despite this possible lack of objectivity, the group broadly agreed with the conclusions that the research team had made. Their input highlighted the need for a set of core outcomes for social prescribing with input from potential beneficiaries. They took a more flexible approach on recommendations around specific target groups and intervention intensity, preferring an individually tailored intervention rather than limit access to those with the highest need.

**5: Reflections/critical perspective**

While the lack of cost effectiveness evidence was highlighted the idea of opportunity cost was not discussed. Presenting an intervention with no cost evidence base against one with cost evidence base however would be an impossible comparison. It is hard in a group format to check understanding of what has been presented, but given that conclusions were aligned with those of the research team it is reasonable to assume the group understood what was presented and asked of them.

review only

| Study ID                        | HRQOL Allocation concealment               | Baseline outcome measurements similar            | Baseline characteristics similar                                                           | Incomplete outcome data                                                                                | Knowledge of the allocated interventions adequately prevented during the study                                                  | Protection against contamination                                                                                                                                                                  | Selective outcome reporting         | Other risks of bias                                                                                                                 | Overall Judgement per study                                                                                                                                                                                                           | Overall judgement for outcome            |
|---------------------------------|--------------------------------------------|--------------------------------------------------|--------------------------------------------------------------------------------------------|--------------------------------------------------------------------------------------------------------|---------------------------------------------------------------------------------------------------------------------------------|---------------------------------------------------------------------------------------------------------------------------------------------------------------------------------------------------|-------------------------------------|-------------------------------------------------------------------------------------------------------------------------------------|---------------------------------------------------------------------------------------------------------------------------------------------------------------------------------------------------------------------------------------|------------------------------------------|
| Kangovi et al, 2018, RCT, SF-12 | Low risk: centralised randomisation scheme | Low risk: Baseline outcome measures were similar | Low risk: there were slightly more participants of hispanic ethnicity in one arm-0 vs 3.7% | Low risk: 79% and 81% f/up in int and control and multiple imputation techniques used for missing data | Unclear risk: not possible to blind to intervention and outcome was patient reported, although RAs collecting data were blinded | Unclear risk: randomisation was at the patient level, however unlikely controls received the intervention, but not explicitly stated whether intervention was available outside the trial setting | Low risk: all outcomes are reported | Unclear: The authors offer commercial consulting services on setting up similar CHW interventions since 2018 after this publication | Low risk: low risk of bias in 6/9 areas, and other areas unlikely to have significant impact on ROB. While the paper is at risk of overly presenting positive findings all outcomes are reported along with statistical significance. |                                          |
| Kangovi et al, 2017, RCT, SF-12 | Low risk: centralised randomisation scheme | Low risk: Baseline outcome measures were similar | Low risk: Intervention group were more likely to be employed 20% vs 8%                     | Low risk: 88% and 87% complete data, multiple imputation                                               | Unclear risk: not possible to blind to intervention and outcome was patient reported,                                           | Unclear risk: randomisation was at the patient level, however unlikely they received                                                                                                              | Low risk: all outcomes are reported | Unclear-The authors offer commercial consulting services on setting up                                                              | Low risk: low risk of bias in 6/9 areas, and other areas unlikely to have                                                                                                                                                             | Summary Judgement RCTs: Low risk of bias |

|    |                                          |                                                                                                                                            |                                                                                                                                                                                   |                                                                                                                       |                                                                                                                                                                |                                                                                                        |                                                                                         |                                               |                                                                                                                                                             |                                                                  |
|----|------------------------------------------|--------------------------------------------------------------------------------------------------------------------------------------------|-----------------------------------------------------------------------------------------------------------------------------------------------------------------------------------|-----------------------------------------------------------------------------------------------------------------------|----------------------------------------------------------------------------------------------------------------------------------------------------------------|--------------------------------------------------------------------------------------------------------|-----------------------------------------------------------------------------------------|-----------------------------------------------|-------------------------------------------------------------------------------------------------------------------------------------------------------------|------------------------------------------------------------------|
| 1  |                                          |                                                                                                                                            |                                                                                                                                                                                   |                                                                                                                       | although RAs                                                                                                                                                   | controls                                                                                               |                                                                                         | similar CHW                                   | significant impact on ROB. While the paper is at risk of overly presenting positive findings all outcomes are reported along with statistical significance. |                                                                  |
| 2  |                                          |                                                                                                                                            |                                                                                                                                                                                   |                                                                                                                       | collecting                                                                                                                                                     | received the                                                                                           |                                                                                         | interventions                                 |                                                                                                                                                             |                                                                  |
| 3  |                                          |                                                                                                                                            |                                                                                                                                                                                   |                                                                                                                       | data were                                                                                                                                                      | intervention,                                                                                          |                                                                                         |                                               |                                                                                                                                                             |                                                                  |
| 4  |                                          |                                                                                                                                            |                                                                                                                                                                                   |                                                                                                                       | blinded                                                                                                                                                        | so not a                                                                                               |                                                                                         |                                               |                                                                                                                                                             |                                                                  |
| 5  |                                          |                                                                                                                                            |                                                                                                                                                                                   |                                                                                                                       |                                                                                                                                                                | major factor                                                                                           |                                                                                         |                                               |                                                                                                                                                             |                                                                  |
| 6  |                                          |                                                                                                                                            |                                                                                                                                                                                   |                                                                                                                       |                                                                                                                                                                | for overall                                                                                            |                                                                                         |                                               |                                                                                                                                                             |                                                                  |
| 7  |                                          |                                                                                                                                            |                                                                                                                                                                                   |                                                                                                                       |                                                                                                                                                                | ROB                                                                                                    |                                                                                         |                                               |                                                                                                                                                             |                                                                  |
| 8  |                                          |                                                                                                                                            |                                                                                                                                                                                   |                                                                                                                       |                                                                                                                                                                |                                                                                                        |                                                                                         |                                               |                                                                                                                                                             |                                                                  |
| 9  |                                          |                                                                                                                                            |                                                                                                                                                                                   |                                                                                                                       |                                                                                                                                                                |                                                                                                        |                                                                                         |                                               |                                                                                                                                                             |                                                                  |
| 10 |                                          |                                                                                                                                            |                                                                                                                                                                                   |                                                                                                                       |                                                                                                                                                                |                                                                                                        |                                                                                         |                                               |                                                                                                                                                             |                                                                  |
| 11 |                                          |                                                                                                                                            |                                                                                                                                                                                   |                                                                                                                       |                                                                                                                                                                |                                                                                                        |                                                                                         |                                               |                                                                                                                                                             |                                                                  |
| 12 |                                          |                                                                                                                                            |                                                                                                                                                                                   |                                                                                                                       |                                                                                                                                                                |                                                                                                        |                                                                                         |                                               |                                                                                                                                                             |                                                                  |
| 13 |                                          |                                                                                                                                            |                                                                                                                                                                                   |                                                                                                                       |                                                                                                                                                                |                                                                                                        |                                                                                         |                                               |                                                                                                                                                             |                                                                  |
| 14 |                                          |                                                                                                                                            |                                                                                                                                                                                   |                                                                                                                       |                                                                                                                                                                |                                                                                                        |                                                                                         |                                               |                                                                                                                                                             |                                                                  |
| 15 |                                          |                                                                                                                                            |                                                                                                                                                                                   |                                                                                                                       |                                                                                                                                                                |                                                                                                        |                                                                                         |                                               |                                                                                                                                                             |                                                                  |
| 16 | Dickens et al,<br>2011, CBA,<br>SF-12    | High risk:<br>CBA and<br>evidence of<br>selection bias<br>with those<br>from more<br>deprived<br>backgrounds<br>not being<br>offered entry | Low risk:<br>significant<br>differences<br>in baseline<br>scores,<br>although<br>linear<br>regression<br>model used<br>which would<br>have<br>corrected for<br>baseline<br>scores | High risk:<br>differences<br>in baseline<br>characteristic<br>s although<br>these were<br>adjusted for<br>in analysis | Low risk: low<br>rates of<br>missing data,<br>84% follow<br>up<br>intervention<br>and 93%<br>control and<br>did separate<br>paired and<br>unpaired<br>analysis | Unclear risk-<br>unclear how<br>follow up<br>assessments<br>were done,<br>by whom<br>and if<br>blinded | Low risk: the<br>service was<br>not available<br>in areas<br>where the<br>control lived | Low risk: all<br>outcomes<br>were<br>reported | Low risk: No<br>other risks<br>identified.<br>Funded by<br>NHS Devon,<br>no<br>competing<br>interests<br>declared.                                          | High risk:<br>high risk or<br>unclear risk<br>in 4 of 9<br>areas |
| 17 |                                          |                                                                                                                                            |                                                                                                                                                                                   |                                                                                                                       |                                                                                                                                                                |                                                                                                        |                                                                                         |                                               |                                                                                                                                                             |                                                                  |
| 18 |                                          |                                                                                                                                            |                                                                                                                                                                                   |                                                                                                                       |                                                                                                                                                                |                                                                                                        |                                                                                         |                                               |                                                                                                                                                             |                                                                  |
| 19 |                                          |                                                                                                                                            |                                                                                                                                                                                   |                                                                                                                       |                                                                                                                                                                |                                                                                                        |                                                                                         |                                               |                                                                                                                                                             |                                                                  |
| 20 |                                          |                                                                                                                                            |                                                                                                                                                                                   |                                                                                                                       |                                                                                                                                                                |                                                                                                        |                                                                                         |                                               |                                                                                                                                                             |                                                                  |
| 21 |                                          |                                                                                                                                            |                                                                                                                                                                                   |                                                                                                                       |                                                                                                                                                                |                                                                                                        |                                                                                         |                                               |                                                                                                                                                             |                                                                  |
| 22 |                                          |                                                                                                                                            |                                                                                                                                                                                   |                                                                                                                       |                                                                                                                                                                |                                                                                                        |                                                                                         |                                               |                                                                                                                                                             |                                                                  |
| 23 |                                          |                                                                                                                                            |                                                                                                                                                                                   |                                                                                                                       |                                                                                                                                                                |                                                                                                        |                                                                                         |                                               |                                                                                                                                                             |                                                                  |
| 24 |                                          |                                                                                                                                            |                                                                                                                                                                                   |                                                                                                                       |                                                                                                                                                                |                                                                                                        |                                                                                         |                                               |                                                                                                                                                             |                                                                  |
| 25 |                                          |                                                                                                                                            |                                                                                                                                                                                   |                                                                                                                       |                                                                                                                                                                |                                                                                                        |                                                                                         |                                               |                                                                                                                                                             |                                                                  |
| 26 |                                          |                                                                                                                                            |                                                                                                                                                                                   |                                                                                                                       |                                                                                                                                                                |                                                                                                        |                                                                                         |                                               |                                                                                                                                                             |                                                                  |
| 27 |                                          |                                                                                                                                            |                                                                                                                                                                                   |                                                                                                                       |                                                                                                                                                                |                                                                                                        |                                                                                         |                                               |                                                                                                                                                             |                                                                  |
| 28 |                                          |                                                                                                                                            |                                                                                                                                                                                   |                                                                                                                       |                                                                                                                                                                |                                                                                                        |                                                                                         |                                               |                                                                                                                                                             |                                                                  |
| 29 |                                          |                                                                                                                                            |                                                                                                                                                                                   |                                                                                                                       |                                                                                                                                                                |                                                                                                        |                                                                                         |                                               |                                                                                                                                                             |                                                                  |
| 30 |                                          |                                                                                                                                            |                                                                                                                                                                                   |                                                                                                                       |                                                                                                                                                                |                                                                                                        |                                                                                         |                                               |                                                                                                                                                             |                                                                  |
| 31 |                                          |                                                                                                                                            |                                                                                                                                                                                   |                                                                                                                       |                                                                                                                                                                |                                                                                                        |                                                                                         |                                               |                                                                                                                                                             |                                                                  |
| 32 | Dickens et al,<br>2011, CBA,<br>EQ-5D-3L | High risk:<br>CBA and<br>evidence of<br>selection bias<br>with those<br>from more<br>deprived<br>backgrounds<br>not being<br>offered entry | Low risk:<br>significant<br>differences<br>in baseline<br>scores,<br>although<br>linear<br>regression<br>model used<br>which would                                                | High risk:<br>differences<br>in baseline<br>characteristic<br>s although<br>these were<br>adjusted for<br>in analysis | Low risk: low<br>rates of<br>missing data,<br>84% follow<br>up<br>intervention<br>and 96%<br>control                                                           | Unclear risk-<br>unclear how<br>follow up<br>assessments<br>were done,<br>by whom<br>and if<br>blinded | Low risk: the<br>service was<br>not available<br>in areas<br>where the<br>control lived | Low risk: all<br>outcomes<br>were<br>reported | Low risk: No<br>other risks<br>identified.<br>Funded by<br>NHS Devon,<br>no<br>competing<br>interests<br>declared.                                          | High risk:<br>high risk or<br>unclear risk<br>in 4 of 9<br>areas |
| 33 |                                          |                                                                                                                                            |                                                                                                                                                                                   |                                                                                                                       |                                                                                                                                                                |                                                                                                        |                                                                                         |                                               |                                                                                                                                                             |                                                                  |
| 34 |                                          |                                                                                                                                            |                                                                                                                                                                                   |                                                                                                                       |                                                                                                                                                                |                                                                                                        |                                                                                         |                                               |                                                                                                                                                             |                                                                  |
| 35 |                                          |                                                                                                                                            |                                                                                                                                                                                   |                                                                                                                       |                                                                                                                                                                |                                                                                                        |                                                                                         |                                               |                                                                                                                                                             |                                                                  |
| 36 |                                          |                                                                                                                                            |                                                                                                                                                                                   |                                                                                                                       |                                                                                                                                                                |                                                                                                        |                                                                                         |                                               |                                                                                                                                                             |                                                                  |
| 37 |                                          |                                                                                                                                            |                                                                                                                                                                                   |                                                                                                                       |                                                                                                                                                                |                                                                                                        |                                                                                         |                                               |                                                                                                                                                             |                                                                  |
| 38 |                                          |                                                                                                                                            |                                                                                                                                                                                   |                                                                                                                       |                                                                                                                                                                |                                                                                                        |                                                                                         |                                               |                                                                                                                                                             |                                                                  |
| 39 |                                          |                                                                                                                                            |                                                                                                                                                                                   |                                                                                                                       |                                                                                                                                                                |                                                                                                        |                                                                                         |                                               |                                                                                                                                                             |                                                                  |
| 40 |                                          |                                                                                                                                            |                                                                                                                                                                                   |                                                                                                                       |                                                                                                                                                                |                                                                                                        |                                                                                         |                                               |                                                                                                                                                             |                                                                  |
| 41 |                                          |                                                                                                                                            |                                                                                                                                                                                   |                                                                                                                       |                                                                                                                                                                |                                                                                                        |                                                                                         |                                               |                                                                                                                                                             |                                                                  |
| 42 |                                          |                                                                                                                                            |                                                                                                                                                                                   |                                                                                                                       |                                                                                                                                                                |                                                                                                        |                                                                                         |                                               |                                                                                                                                                             |                                                                  |

|    |                                                              |                                                                                    |                                                                                                 |                                                        |                                                                                          |                                                                          |                                      |                                                                                               |  |  |  |
|----|--------------------------------------------------------------|------------------------------------------------------------------------------------|-------------------------------------------------------------------------------------------------|--------------------------------------------------------|------------------------------------------------------------------------------------------|--------------------------------------------------------------------------|--------------------------------------|-----------------------------------------------------------------------------------------------|--|--|--|
|    |                                                              | have corrected for baseline scores                                                 |                                                                                                 |                                                        |                                                                                          |                                                                          |                                      |                                                                                               |  |  |  |
| 1  |                                                              |                                                                                    |                                                                                                 |                                                        |                                                                                          |                                                                          |                                      |                                                                                               |  |  |  |
| 2  |                                                              |                                                                                    |                                                                                                 |                                                        |                                                                                          |                                                                          |                                      |                                                                                               |  |  |  |
| 3  |                                                              |                                                                                    |                                                                                                 |                                                        |                                                                                          |                                                                          |                                      |                                                                                               |  |  |  |
| 4  |                                                              |                                                                                    |                                                                                                 |                                                        |                                                                                          |                                                                          |                                      |                                                                                               |  |  |  |
| 5  | Mercer et al, 2019, CBA, EQ-5D-5L                            |                                                                                    |                                                                                                 |                                                        |                                                                                          |                                                                          |                                      |                                                                                               |  |  |  |
| 6  |                                                              |                                                                                    |                                                                                                 |                                                        |                                                                                          |                                                                          |                                      |                                                                                               |  |  |  |
| 7  |                                                              |                                                                                    |                                                                                                 |                                                        |                                                                                          |                                                                          |                                      |                                                                                               |  |  |  |
| 8  |                                                              |                                                                                    |                                                                                                 |                                                        |                                                                                          |                                                                          |                                      |                                                                                               |  |  |  |
| 9  |                                                              |                                                                                    |                                                                                                 |                                                        |                                                                                          |                                                                          |                                      |                                                                                               |  |  |  |
| 10 |                                                              |                                                                                    |                                                                                                 |                                                        |                                                                                          |                                                                          |                                      |                                                                                               |  |  |  |
| 11 | Unclear risk: practices randomly assigned but how not stated | Low risk: significant differences in baseline-explicitly corrected for in analysis | High risk: differences in baseline characteristics although these were adjusted for in analysis | Low risk: 76% follow up int, 92% control, ITT analysis | High risk: due to the nature of the intervention not possible to assess outcomes blindly | Low risk: the service was not available in areas where the control lived | Low risk: all outcomes were reported | Low risk: No other risks identified. Funded by NHS Scotland, no competing interests declared. |  |  |  |
| 12 |                                                              |                                                                                    |                                                                                                 |                                                        |                                                                                          |                                                                          |                                      |                                                                                               |  |  |  |
| 13 |                                                              |                                                                                    |                                                                                                 |                                                        |                                                                                          |                                                                          |                                      |                                                                                               |  |  |  |
| 14 |                                                              |                                                                                    |                                                                                                 |                                                        |                                                                                          |                                                                          |                                      |                                                                                               |  |  |  |
| 15 |                                                              |                                                                                    |                                                                                                 |                                                        |                                                                                          |                                                                          |                                      |                                                                                               |  |  |  |
| 16 |                                                              |                                                                                    |                                                                                                 |                                                        |                                                                                          |                                                                          |                                      |                                                                                               |  |  |  |
| 17 |                                                              |                                                                                    |                                                                                                 |                                                        |                                                                                          |                                                                          |                                      |                                                                                               |  |  |  |
| 18 |                                                              |                                                                                    |                                                                                                 |                                                        |                                                                                          |                                                                          |                                      |                                                                                               |  |  |  |
| 19 |                                                              |                                                                                    |                                                                                                 |                                                        |                                                                                          |                                                                          |                                      |                                                                                               |  |  |  |
| 20 |                                                              |                                                                                    |                                                                                                 |                                                        |                                                                                          |                                                                          |                                      |                                                                                               |  |  |  |
| 21 |                                                              |                                                                                    |                                                                                                 |                                                        |                                                                                          |                                                                          |                                      |                                                                                               |  |  |  |
| 22 |                                                              |                                                                                    |                                                                                                 |                                                        |                                                                                          |                                                                          |                                      |                                                                                               |  |  |  |
| 23 |                                                              |                                                                                    |                                                                                                 |                                                        |                                                                                          |                                                                          |                                      |                                                                                               |  |  |  |
| 24 |                                                              |                                                                                    |                                                                                                 |                                                        |                                                                                          |                                                                          |                                      |                                                                                               |  |  |  |
| 25 |                                                              |                                                                                    |                                                                                                 |                                                        |                                                                                          |                                                                          |                                      |                                                                                               |  |  |  |
| 26 |                                                              |                                                                                    |                                                                                                 |                                                        |                                                                                          |                                                                          |                                      |                                                                                               |  |  |  |
| 27 |                                                              |                                                                                    |                                                                                                 |                                                        |                                                                                          |                                                                          |                                      |                                                                                               |  |  |  |
| 28 |                                                              |                                                                                    |                                                                                                 |                                                        |                                                                                          |                                                                          |                                      |                                                                                               |  |  |  |
| 29 |                                                              |                                                                                    |                                                                                                 |                                                        |                                                                                          |                                                                          |                                      |                                                                                               |  |  |  |
| 30 |                                                              |                                                                                    |                                                                                                 |                                                        |                                                                                          |                                                                          |                                      |                                                                                               |  |  |  |
| 31 |                                                              |                                                                                    |                                                                                                 |                                                        |                                                                                          |                                                                          |                                      |                                                                                               |  |  |  |
| 32 |                                                              |                                                                                    |                                                                                                 |                                                        |                                                                                          |                                                                          |                                      |                                                                                               |  |  |  |
| 33 |                                                              |                                                                                    |                                                                                                 |                                                        |                                                                                          |                                                                          |                                      |                                                                                               |  |  |  |
| 34 |                                                              |                                                                                    |                                                                                                 |                                                        |                                                                                          |                                                                          |                                      |                                                                                               |  |  |  |
| 35 |                                                              |                                                                                    |                                                                                                 |                                                        |                                                                                          |                                                                          |                                      |                                                                                               |  |  |  |
| 36 |                                                              |                                                                                    |                                                                                                 |                                                        |                                                                                          |                                                                          |                                      |                                                                                               |  |  |  |
| 37 |                                                              |                                                                                    |                                                                                                 |                                                        |                                                                                          |                                                                          |                                      |                                                                                               |  |  |  |
| 38 |                                                              |                                                                                    |                                                                                                 |                                                        |                                                                                          |                                                                          |                                      |                                                                                               |  |  |  |
| 39 |                                                              |                                                                                    |                                                                                                 |                                                        |                                                                                          |                                                                          |                                      |                                                                                               |  |  |  |
| 40 |                                                              |                                                                                    |                                                                                                 |                                                        |                                                                                          |                                                                          |                                      |                                                                                               |  |  |  |
| 41 |                                                              |                                                                                    |                                                                                                 |                                                        |                                                                                          |                                                                          |                                      |                                                                                               |  |  |  |
| 42 |                                                              |                                                                                    |                                                                                                 |                                                        |                                                                                          |                                                                          |                                      |                                                                                               |  |  |  |
| 43 |                                                              |                                                                                    |                                                                                                 |                                                        |                                                                                          |                                                                          |                                      |                                                                                               |  |  |  |
| 44 |                                                              |                                                                                    |                                                                                                 |                                                        |                                                                                          |                                                                          |                                      |                                                                                               |  |  |  |
| 45 |                                                              |                                                                                    |                                                                                                 |                                                        |                                                                                          |                                                                          |                                      |                                                                                               |  |  |  |
| 46 |                                                              |                                                                                    |                                                                                                 |                                                        |                                                                                          |                                                                          |                                      |                                                                                               |  |  |  |

Summary Judgement NRCTS: High risk of Bias due to non randomised design and challenge of finding suitable controls.

Mental Health

| Study ID                                  | Allocation concealment                                                                           | Baseline outcome measurements similar                                                | Baseline characteristics similar                                                             | Incomplete outcome data                                                                                | Knowledge of the allocated interventions adequately prevented during the study                                | Protection against contamination                                                                                             | Selective outcome reporting          | Other risks of bias                                                                                    | Overall Judgement per study                                                                               | Overall judgement for outcome            |
|-------------------------------------------|--------------------------------------------------------------------------------------------------|--------------------------------------------------------------------------------------|----------------------------------------------------------------------------------------------|--------------------------------------------------------------------------------------------------------|---------------------------------------------------------------------------------------------------------------|------------------------------------------------------------------------------------------------------------------------------|--------------------------------------|--------------------------------------------------------------------------------------------------------|-----------------------------------------------------------------------------------------------------------|------------------------------------------|
| Grant et al, 2000, RCT, HADS A and HADS D | Low risk: sealed opaque envelopes, while there was an early error- this was identified and those | Low risk: no important differences and baseline scores were adjusted for in analysis | low risk: control were slightly more likely to be male and otherwise comparable, this had no | Low risk: similar amounts of missing data in both arms, at 67%, however this reduced power to detect a | High risk: due to the nature of the intervention not possible to blind participants and self reported outcome | Unclear risk: randomisation was at the patient level within practices, unclear if the intervention was available outside the | Low risk: all outcomes were reported | Low risk: No other risks identified. Funded by Avon health authority, no competing interests declared. | Low risk: low risk in 7 of 9 areas, blinding very challenging given nature of intervention and were using | Summary Judgement RCTs: low risk of bias |

1  
2  
3  
4  
5  
6  
7  
8  
9  
10  
11  
12  
13  
14  
15  
16  
17  
18  
19  
20  
21  
22  
23  
24  
25  
26  
27  
28  
29  
30  
31  
32  
33  
34  
35  
36  
37  
38  
39  
40  
41  
42  
43  
44  
45  
46

|                                            |                                                                                        |                                                                                                                                            |                                                                                                                                                                                  |                                                                                                                  |                                                                                                                     |                                                                                                   |                                      |                                                                                                                                                              |
|--------------------------------------------|----------------------------------------------------------------------------------------|--------------------------------------------------------------------------------------------------------------------------------------------|----------------------------------------------------------------------------------------------------------------------------------------------------------------------------------|------------------------------------------------------------------------------------------------------------------|---------------------------------------------------------------------------------------------------------------------|---------------------------------------------------------------------------------------------------|--------------------------------------|--------------------------------------------------------------------------------------------------------------------------------------------------------------|
|                                            | participants excluded                                                                  |                                                                                                                                            | impact on results when adjusted for in analysis                                                                                                                                  | difference as required sample size was 161                                                                       |                                                                                                                     | trial-suggestion it was already running, so people may have received it before entering the trial |                                      | validated PROMs                                                                                                                                              |
| Carnes et al, 2017, CBA, HADS A and HADS D | High risk: CBA                                                                         | Low risk: significant differences in baseline scores, although linear regression model used which would have corrected for baseline scores | High risk: significant differences in living arrangements, education, work status, adjustments for same did not significantly alter results, suggesting other unknown imbalances | High risk: control follow up 43%, int 35%, no data on whether those LTFup had different baseline characteristics | High risk: due to the nature of the intervention not possible to assess outcomes blindly and patients self reported | Low risk: the service was not available in areas where the control lived                          | Low risk: all outcomes were reported | Low risk: No other risks identified. Funded by DoH, independent research group, no competing interests declared.<br><br>High risk: high risk in 5 of 9 areas |
| Dickens et al, 2011, CBA, GDS              | High risk: CBA and evidence of selection bias with those from more deprived background | Low risk: significant differences in baseline scores, although linear regression model used                                                | High risk: differences in baseline characteristics although these were adjusted for in analysis                                                                                  | Low risk: low rates of missing data, 84% follow up intervention and 96% control                                  | Unclear risk: due to the nature of the intervention not possible to blind participants and unclear                  | Low risk: the service was not available in areas where the control lived                          | Low risk: all outcomes were reported | Low risk: No other risks identified. Funded by NHS Hackney CCG, no competing<br><br>High risk: high risk or unclear risk in 4 of 9 areas                     |

|    |                                                                                                                                                      |                                                                                     |                                                                                                 |                                          |                                                                                                                                                 |                                                                          |                                      |                                                                                               |                                              |
|----|------------------------------------------------------------------------------------------------------------------------------------------------------|-------------------------------------------------------------------------------------|-------------------------------------------------------------------------------------------------|------------------------------------------|-------------------------------------------------------------------------------------------------------------------------------------------------|--------------------------------------------------------------------------|--------------------------------------|-----------------------------------------------------------------------------------------------|----------------------------------------------|
| 1  | s not being offered entry                                                                                                                            | which would have corrected for baseline scores                                      |                                                                                                 |                                          | how follow up collected                                                                                                                         |                                                                          | interests declared.                  |                                                                                               |                                              |
| 2  |                                                                                                                                                      |                                                                                     |                                                                                                 |                                          |                                                                                                                                                 |                                                                          |                                      |                                                                                               |                                              |
| 3  |                                                                                                                                                      |                                                                                     |                                                                                                 |                                          |                                                                                                                                                 |                                                                          |                                      |                                                                                               |                                              |
| 4  |                                                                                                                                                      |                                                                                     |                                                                                                 |                                          |                                                                                                                                                 |                                                                          |                                      |                                                                                               |                                              |
| 5  |                                                                                                                                                      |                                                                                     |                                                                                                 |                                          |                                                                                                                                                 |                                                                          |                                      |                                                                                               |                                              |
| 6  | Unclear risk: practices randomly assigned but how not stated                                                                                         | Low risk: significant differences in baseline- explicitly corrected for in analysis | High risk: differences in baseline characteristics although these were adjusted for in analysis | Low risk: 76% follow up int, 92% control | High risk: due to the nature of the intervention not possible to assess outcomes blindly and patients self reported, statisticians were blinded | Low risk: the service was not available in areas where the control lived | Low risk: all outcomes were reported | Low risk: No other risks identified. Funded by NHS Scotland, no competing interests declared. | High or unclear risk of bias in 4 of 9 areas |
| 7  | Mercer et al, 2019, CBA, HADS A and HADS D                                                                                                           |                                                                                     |                                                                                                 |                                          |                                                                                                                                                 |                                                                          |                                      |                                                                                               |                                              |
| 8  |                                                                                                                                                      |                                                                                     |                                                                                                 |                                          |                                                                                                                                                 |                                                                          |                                      |                                                                                               |                                              |
| 9  |                                                                                                                                                      |                                                                                     |                                                                                                 |                                          |                                                                                                                                                 |                                                                          |                                      |                                                                                               |                                              |
| 10 |                                                                                                                                                      |                                                                                     |                                                                                                 |                                          |                                                                                                                                                 |                                                                          |                                      |                                                                                               |                                              |
| 11 |                                                                                                                                                      |                                                                                     |                                                                                                 |                                          |                                                                                                                                                 |                                                                          |                                      |                                                                                               |                                              |
| 12 |                                                                                                                                                      |                                                                                     |                                                                                                 |                                          |                                                                                                                                                 |                                                                          |                                      |                                                                                               |                                              |
| 13 |                                                                                                                                                      |                                                                                     |                                                                                                 |                                          |                                                                                                                                                 |                                                                          |                                      |                                                                                               |                                              |
| 14 |                                                                                                                                                      |                                                                                     |                                                                                                 |                                          |                                                                                                                                                 |                                                                          |                                      |                                                                                               |                                              |
| 15 |                                                                                                                                                      |                                                                                     |                                                                                                 |                                          |                                                                                                                                                 |                                                                          |                                      |                                                                                               |                                              |
| 16 |                                                                                                                                                      |                                                                                     |                                                                                                 |                                          |                                                                                                                                                 |                                                                          |                                      |                                                                                               |                                              |
| 17 |                                                                                                                                                      |                                                                                     |                                                                                                 |                                          |                                                                                                                                                 |                                                                          |                                      |                                                                                               |                                              |
| 18 |                                                                                                                                                      |                                                                                     |                                                                                                 |                                          |                                                                                                                                                 |                                                                          |                                      |                                                                                               |                                              |
| 19 |                                                                                                                                                      |                                                                                     |                                                                                                 |                                          |                                                                                                                                                 |                                                                          |                                      |                                                                                               |                                              |
| 20 |                                                                                                                                                      |                                                                                     |                                                                                                 |                                          |                                                                                                                                                 |                                                                          |                                      |                                                                                               |                                              |
| 21 |                                                                                                                                                      |                                                                                     |                                                                                                 |                                          |                                                                                                                                                 |                                                                          |                                      |                                                                                               |                                              |
| 22 | Summary Judgement nRCTS: high risk of bias due to difficulty in concealing allocation, baseline differences in control groups, non randomised design |                                                                                     |                                                                                                 |                                          |                                                                                                                                                 |                                                                          |                                      |                                                                                               |                                              |
| 23 |                                                                                                                                                      |                                                                                     |                                                                                                 |                                          |                                                                                                                                                 |                                                                          |                                      |                                                                                               |                                              |
| 24 |                                                                                                                                                      |                                                                                     |                                                                                                 |                                          |                                                                                                                                                 |                                                                          |                                      |                                                                                               |                                              |
| 25 |                                                                                                                                                      |                                                                                     |                                                                                                 |                                          |                                                                                                                                                 |                                                                          |                                      |                                                                                               |                                              |
| 26 |                                                                                                                                                      |                                                                                     |                                                                                                 |                                          |                                                                                                                                                 |                                                                          |                                      |                                                                                               |                                              |
| 27 |                                                                                                                                                      |                                                                                     |                                                                                                 |                                          |                                                                                                                                                 |                                                                          |                                      |                                                                                               |                                              |

Social Contacts

|    |                   |                                                                                                      |                                                     |                                                                        |                                                                                                   |                                                                |                                                                                             |                                                                                        |                                              |                                                                                                      |
|----|-------------------|------------------------------------------------------------------------------------------------------|-----------------------------------------------------|------------------------------------------------------------------------|---------------------------------------------------------------------------------------------------|----------------------------------------------------------------|---------------------------------------------------------------------------------------------|----------------------------------------------------------------------------------------|----------------------------------------------|------------------------------------------------------------------------------------------------------|
| 31 | Clarke et al, RCT | Unclear risk- register of all >75s living alone compiled and arranged into deciles by social contact | Unclear risk- Method of randomisation not specified | Low risk- reported and no significant differences in baseline outcomes | High risk- characteristics such as age, gender, education etc not reported, only baseline outcome | Low risk- similar loss to follow up in both arms, with reasons | Unclear risk- participants would be aware of their allocation, although interview assessors | Low risk- while randomised at patient level it seems very unlikely control group would | Low risk- all outcomes reported at follow up | Low risk- while some areas unclear due to lack of reporting, unlikely to affect outcome, low risk in |
| 32 |                   |                                                                                                      |                                                     |                                                                        |                                                                                                   |                                                                |                                                                                             |                                                                                        |                                              |                                                                                                      |
| 33 |                   |                                                                                                      |                                                     |                                                                        |                                                                                                   |                                                                |                                                                                             |                                                                                        |                                              |                                                                                                      |
| 34 |                   |                                                                                                      |                                                     |                                                                        |                                                                                                   |                                                                |                                                                                             |                                                                                        |                                              |                                                                                                      |
| 35 |                   |                                                                                                      |                                                     |                                                                        |                                                                                                   |                                                                |                                                                                             |                                                                                        |                                              |                                                                                                      |
| 36 |                   |                                                                                                      |                                                     |                                                                        |                                                                                                   |                                                                |                                                                                             |                                                                                        |                                              |                                                                                                      |
| 37 |                   |                                                                                                      |                                                     |                                                                        |                                                                                                   |                                                                |                                                                                             |                                                                                        |                                              |                                                                                                      |
| 38 |                   |                                                                                                      |                                                     |                                                                        |                                                                                                   |                                                                |                                                                                             |                                                                                        |                                              |                                                                                                      |
| 39 |                   |                                                                                                      |                                                     |                                                                        |                                                                                                   |                                                                |                                                                                             |                                                                                        |                                              |                                                                                                      |
| 40 |                   |                                                                                                      |                                                     |                                                                        |                                                                                                   |                                                                |                                                                                             |                                                                                        |                                              |                                                                                                      |
| 41 |                   |                                                                                                      |                                                     |                                                                        |                                                                                                   |                                                                |                                                                                             |                                                                                        |                                              |                                                                                                      |
| 42 |                   |                                                                                                      |                                                     |                                                                        |                                                                                                   |                                                                |                                                                                             |                                                                                        |                                              |                                                                                                      |
| 43 |                   |                                                                                                      |                                                     |                                                                        |                                                                                                   |                                                                |                                                                                             |                                                                                        |                                              |                                                                                                      |
| 44 |                   |                                                                                                      |                                                     |                                                                        |                                                                                                   |                                                                |                                                                                             |                                                                                        |                                              |                                                                                                      |
| 45 |                   |                                                                                                      |                                                     |                                                                        |                                                                                                   |                                                                |                                                                                             |                                                                                        |                                              |                                                                                                      |
| 46 |                   |                                                                                                      |                                                     |                                                                        |                                                                                                   |                                                                |                                                                                             |                                                                                        |                                              |                                                                                                      |

|    |             |             |             |              |             |              |              |           |             |              |              |
|----|-------------|-------------|-------------|--------------|-------------|--------------|--------------|-----------|-------------|--------------|--------------|
| 1  | score and   |             |             | measures     |             | were         | have         |           |             | 5 of 9       |              |
| 2  | randomly    |             |             | referred to  |             | blinded      | received     |           |             | areas        |              |
| 3  | allocated   |             |             | as           |             |              | intervention |           |             |              |              |
| 4  | into        |             |             | characteris  |             |              | n as it was  |           |             |              |              |
| 5  | control     |             |             | tics         |             |              | not          |           |             |              |              |
| 6  | and         |             |             |              |             |              | available    |           |             |              |              |
| 7  | experimen   |             |             |              |             |              | other than   |           |             |              |              |
| 8  | tal arms-   |             |             |              |             |              | through      |           |             |              |              |
| 9  | how         |             |             |              |             |              | the trial    |           |             |              |              |
| 10 | randomise   |             |             |              |             |              |              |           |             |              |              |
| 11 | d not       |             |             |              |             |              |              |           |             |              |              |
| 12 | specified   |             |             |              |             |              |              |           |             |              |              |
| 13 |             |             |             |              |             |              |              |           |             |              |              |
| 14 | Grant et al |             |             |              |             |              | Unclear      |           |             |              |              |
| 15 | 2000, RCT,  |             |             |              |             |              | risk:        |           |             |              |              |
| 16 | Dukes UNC   |             |             |              |             |              | randomisat   |           |             |              |              |
| 17 | score       |             |             | low risk:    |             |              | ion was at   |           |             |              |              |
| 18 |             |             |             | control      |             |              | the patient  |           |             |              |              |
| 19 |             |             |             | were         | Low risk:   |              | level        |           |             |              |              |
| 20 |             |             |             | slightly     | similar     |              | within       |           |             |              |              |
| 21 |             | Low risk:   |             | more likely  | amounts of  |              | practices,   |           |             |              |              |
| 22 |             | sealed      |             | to be male   | missing     | High risk:   | unclear if   |           |             |              |              |
| 23 |             | opaque      |             | and          | data in     | due to the   | the          |           | Low risk:   |              |              |
| 24 |             | envelopes,  | Low risk:   | younger      | both arms,  | nature of    | intervention |           | No other    |              |              |
| 25 | Low risk:   | however     | no          | but          | at 67%,     | the          | was          |           | risks       |              |              |
| 26 | Sequenced   | reported    | important   | otherwise    | however     | intervention | running in   |           | identified. |              | Low risk:    |
| 27 | numbered    | that there  | differences | comparabl    | this        | n not        | the local    |           | Funded by   |              | Both RCTs    |
| 28 | envelopes   | were        | and         | e, this had  | reduced     | possible to  | area so      |           | Avon        |              | mainly low   |
| 29 | prepared    | issues in   | baseline    | no impact    | power to    | assess       | possible     |           | health      |              | risks        |
| 30 | by          | early       | scores      | on results   | detect a    | outcomes     | patients     | Low risk: | autothirty, |              | arise from   |
| 31 | research    | stages and  | were        | when         | difference  | blindly and  | could have   | all       | no          |              | poor         |
| 32 | team,       | some        | adjusted    | adjusted     | as required | patients     | accessed it  | outcomes  | competing   | Low risk:    | reporting    |
| 33 | block       | patients    | for in      | for in       | sample size | self         | outside the  | were      | interests   | low risk in  | and nature   |
| 34 | randomisat  | excluded    | analysis    | analysis     | was 161     | reported     | trial        | reported  | declared.   | 7 of 9       | of           |
| 35 | ion         |             |             |              |             |              |              |           |             | areas        | interventio  |
| 36 |             |             |             |              |             |              |              |           |             |              | n            |
| 37 |             |             |             |              |             |              |              |           |             |              |              |
| 38 | Dickens et  |             |             |              |             | Unclear      | Low risk:    | Low risk: | Low risk:   | High risk:   | High risk:   |
| 39 | al, 2011,   | High risk:  | Low risk:   | High risk:   | Low risk:   | risk: due to | the service  | all       | No other    | high or      | only one     |
| 40 | CBA, MOS-   | controlled  | significant | differences  | low rates   | the nature   | was not      | outcomes  | risks       | unclear      | CBA and it   |
| 41 | 6           | before      | differences | in basleline | of missing  | of the       | available in | were      | identified. | risk in 4 of | is at high   |
| 42 |             | after study | in baseline | characteris  | data, 84%   | interventio  | areas        | reported  | Funded by   | 9 areas      | risk of bias |
| 43 |             |             | scores,     | tics         | follow up   |              |              |           |             |              |              |
| 44 |             |             |             |              |             |              |              |           |             |              |              |
| 45 |             |             |             |              |             |              |              |           |             |              |              |
| 46 |             |             |             |              |             |              |              |           |             |              |              |



|    |                                  |                                                                        |                                                                                      |                                              |                              |                                                                     |                         |                                                |  |  |
|----|----------------------------------|------------------------------------------------------------------------|--------------------------------------------------------------------------------------|----------------------------------------------|------------------------------|---------------------------------------------------------------------|-------------------------|------------------------------------------------|--|--|
| 1  |                                  | bias with those from more deprived backgrounds not being offered entry | although linear regression model used which would have corrected for baseline scores | although these were adjusted for in analysis | intervention and 96% control | cannot blind participants and not stated how outcomes were assessed | where the control lived | NHS Scotland, no competing interests declared. |  |  |
| 2  |                                  |                                                                        |                                                                                      |                                              |                              |                                                                     |                         |                                                |  |  |
| 3  |                                  |                                                                        |                                                                                      |                                              |                              |                                                                     |                         |                                                |  |  |
| 4  |                                  |                                                                        |                                                                                      |                                              |                              |                                                                     |                         |                                                |  |  |
| 5  |                                  |                                                                        |                                                                                      |                                              |                              |                                                                     |                         |                                                |  |  |
| 6  |                                  |                                                                        |                                                                                      |                                              |                              |                                                                     |                         |                                                |  |  |
| 7  |                                  |                                                                        |                                                                                      |                                              |                              |                                                                     |                         |                                                |  |  |
| 8  |                                  |                                                                        |                                                                                      |                                              |                              |                                                                     |                         |                                                |  |  |
| 9  |                                  |                                                                        |                                                                                      |                                              |                              |                                                                     |                         |                                                |  |  |
| 10 |                                  |                                                                        |                                                                                      |                                              |                              |                                                                     |                         |                                                |  |  |
| 11 |                                  |                                                                        |                                                                                      |                                              |                              |                                                                     |                         |                                                |  |  |
| 12 |                                  |                                                                        |                                                                                      |                                              |                              |                                                                     |                         |                                                |  |  |
| 13 | Overall:                         |                                                                        |                                                                                      |                                              |                              |                                                                     |                         |                                                |  |  |
| 14 | Low risk: Evidence from two RCTs |                                                                        |                                                                                      |                                              |                              |                                                                     |                         |                                                |  |  |

Physical Activity

|    |                         |                                                                                                                                                                                                  |                                                    |                                                                       |                                                                                                                                  |                                                               |                                                                                                         |                                                                                                                                                                       |                                                                        |                                                           |                                                                                                                  |
|----|-------------------------|--------------------------------------------------------------------------------------------------------------------------------------------------------------------------------------------------|----------------------------------------------------|-----------------------------------------------------------------------|----------------------------------------------------------------------------------------------------------------------------------|---------------------------------------------------------------|---------------------------------------------------------------------------------------------------------|-----------------------------------------------------------------------------------------------------------------------------------------------------------------------|------------------------------------------------------------------------|-----------------------------------------------------------|------------------------------------------------------------------------------------------------------------------|
| 19 | Clarke et al, RCT, ADLs | Unclear risk-register of all >75s living alone compiled and arranged into deciles by social contact score and randomly allocated into control and experimental arms-how randomised not specified | Unclear risk-Method of randomisation not specified | Low risk-reported and no significant differences in baseline outcomes | High risk-characteristics such as age, education etc not reported, only baseline outcome measures referred to as characteristics | Low risk-similar loss to follow up in both arms, with reasons | Unclear risk-participants would be aware of their allocation, although interview assessors were blinded | Low risk-while randomised at patient level it seems very unlikely control group would have received intervention as it was not available other than through the trial | Low risk- all outcomes reported at baseline were reported at follow up | Low risk-publicly funded, no competing interests declared | Low risk-while some areas unclear due to lack of reporting, unlikely to affect outcome, low risk in 5 of 9 areas |
|----|-------------------------|--------------------------------------------------------------------------------------------------------------------------------------------------------------------------------------------------|----------------------------------------------------|-----------------------------------------------------------------------|----------------------------------------------------------------------------------------------------------------------------------|---------------------------------------------------------------|---------------------------------------------------------------------------------------------------------|-----------------------------------------------------------------------------------------------------------------------------------------------------------------------|------------------------------------------------------------------------|-----------------------------------------------------------|------------------------------------------------------------------------------------------------------------------|

|    |                     |  |  |               |  |  |  |  |  |  |  |  |  |  |  |  |  |  |  |  |
|----|---------------------|--|--|---------------|--|--|--|--|--|--|--|--|--|--|--|--|--|--|--|--|
| 1  | Grant et al         |  |  | low risk:     |  |  |  |  |  |  |  |  |  |  |  |  |  |  |  |  |
| 2  | 2000, RCT,          |  |  | were          |  |  |  |  |  |  |  |  |  |  |  |  |  |  |  |  |
| 3  | COOP                |  |  | slightly      |  |  |  |  |  |  |  |  |  |  |  |  |  |  |  |  |
| 4  | Wonca               |  |  | more likely   |  |  |  |  |  |  |  |  |  |  |  |  |  |  |  |  |
| 5  | Daily               |  |  | to be male    |  |  |  |  |  |  |  |  |  |  |  |  |  |  |  |  |
| 6  | Activities          |  |  | and           |  |  |  |  |  |  |  |  |  |  |  |  |  |  |  |  |
| 7  |                     |  |  | younger       |  |  |  |  |  |  |  |  |  |  |  |  |  |  |  |  |
| 8  |                     |  |  | but           |  |  |  |  |  |  |  |  |  |  |  |  |  |  |  |  |
| 9  |                     |  |  | otherwise     |  |  |  |  |  |  |  |  |  |  |  |  |  |  |  |  |
| 10 |                     |  |  | comparabl     |  |  |  |  |  |  |  |  |  |  |  |  |  |  |  |  |
| 11 |                     |  |  | e, this had   |  |  |  |  |  |  |  |  |  |  |  |  |  |  |  |  |
| 12 |                     |  |  | no impact     |  |  |  |  |  |  |  |  |  |  |  |  |  |  |  |  |
| 13 |                     |  |  | on reuslts    |  |  |  |  |  |  |  |  |  |  |  |  |  |  |  |  |
| 14 |                     |  |  | when          |  |  |  |  |  |  |  |  |  |  |  |  |  |  |  |  |
| 15 |                     |  |  | adjusted      |  |  |  |  |  |  |  |  |  |  |  |  |  |  |  |  |
| 16 |                     |  |  | for in        |  |  |  |  |  |  |  |  |  |  |  |  |  |  |  |  |
| 17 |                     |  |  | analysis      |  |  |  |  |  |  |  |  |  |  |  |  |  |  |  |  |
| 18 |                     |  |  |               |  |  |  |  |  |  |  |  |  |  |  |  |  |  |  |  |
| 19 |                     |  |  |               |  |  |  |  |  |  |  |  |  |  |  |  |  |  |  |  |
| 20 |                     |  |  |               |  |  |  |  |  |  |  |  |  |  |  |  |  |  |  |  |
| 21 | Carnes et al, 2017, |  |  | High risk:    |  |  |  |  |  |  |  |  |  |  |  |  |  |  |  |  |
| 22 | 2017,               |  |  | significant   |  |  |  |  |  |  |  |  |  |  |  |  |  |  |  |  |
| 23 | CBA,                |  |  | differences   |  |  |  |  |  |  |  |  |  |  |  |  |  |  |  |  |
| 24 | Number              |  |  | in living     |  |  |  |  |  |  |  |  |  |  |  |  |  |  |  |  |
| 25 | regular             |  |  | arrangeme     |  |  |  |  |  |  |  |  |  |  |  |  |  |  |  |  |
| 26 | activities          |  |  | nt,           |  |  |  |  |  |  |  |  |  |  |  |  |  |  |  |  |
| 27 |                     |  |  | education,    |  |  |  |  |  |  |  |  |  |  |  |  |  |  |  |  |
| 28 |                     |  |  | work          |  |  |  |  |  |  |  |  |  |  |  |  |  |  |  |  |
| 29 |                     |  |  | status,       |  |  |  |  |  |  |  |  |  |  |  |  |  |  |  |  |
| 30 |                     |  |  | adjustment    |  |  |  |  |  |  |  |  |  |  |  |  |  |  |  |  |
| 31 |                     |  |  | s for same    |  |  |  |  |  |  |  |  |  |  |  |  |  |  |  |  |
| 32 |                     |  |  | did not       |  |  |  |  |  |  |  |  |  |  |  |  |  |  |  |  |
| 33 |                     |  |  | significantly |  |  |  |  |  |  |  |  |  |  |  |  |  |  |  |  |
| 34 |                     |  |  | alter         |  |  |  |  |  |  |  |  |  |  |  |  |  |  |  |  |
| 35 |                     |  |  | results,      |  |  |  |  |  |  |  |  |  |  |  |  |  |  |  |  |
| 36 |                     |  |  | suggesting    |  |  |  |  |  |  |  |  |  |  |  |  |  |  |  |  |
| 37 |                     |  |  | other         |  |  |  |  |  |  |  |  |  |  |  |  |  |  |  |  |
| 38 |                     |  |  | unknown       |  |  |  |  |  |  |  |  |  |  |  |  |  |  |  |  |
| 39 |                     |  |  | imbalances    |  |  |  |  |  |  |  |  |  |  |  |  |  |  |  |  |
| 40 |                     |  |  |               |  |  |  |  |  |  |  |  |  |  |  |  |  |  |  |  |
| 41 |                     |  |  |               |  |  |  |  |  |  |  |  |  |  |  |  |  |  |  |  |
| 42 |                     |  |  |               |  |  |  |  |  |  |  |  |  |  |  |  |  |  |  |  |
| 43 |                     |  |  |               |  |  |  |  |  |  |  |  |  |  |  |  |  |  |  |  |
| 44 |                     |  |  |               |  |  |  |  |  |  |  |  |  |  |  |  |  |  |  |  |
| 45 |                     |  |  |               |  |  |  |  |  |  |  |  |  |  |  |  |  |  |  |  |
| 46 |                     |  |  |               |  |  |  |  |  |  |  |  |  |  |  |  |  |  |  |  |



1  
2  
3  
4  
5  
6  
7  
8  
9  
10  
11  
12  
13  
14  
15  
16  
17  
18  
19  
20  
21  
22  
23  
24  
25  
26  
27  
28  
29  
30  
31  
32  
33  
34  
35  
36  
37  
38  
39  
40  
41  
42  
43  
44  
45  
46

|                                                                  |                                                                                                            |                                            |                                                                                      |                                                                                                                                                          |                                                                                       |                                                                                                       |                                                                                                                         |                                      |                                                                                                                                                                                                                                               |
|------------------------------------------------------------------|------------------------------------------------------------------------------------------------------------|--------------------------------------------|--------------------------------------------------------------------------------------|----------------------------------------------------------------------------------------------------------------------------------------------------------|---------------------------------------------------------------------------------------|-------------------------------------------------------------------------------------------------------|-------------------------------------------------------------------------------------------------------------------------|--------------------------------------|-----------------------------------------------------------------------------------------------------------------------------------------------------------------------------------------------------------------------------------------------|
| al arms-how randomised not specified                             |                                                                                                            |                                            |                                                                                      |                                                                                                                                                          |                                                                                       |                                                                                                       |                                                                                                                         | through the trial                    |                                                                                                                                                                                                                                               |
| Grant et al 2000, RCT, PC visits, referrals, medications         | Low risk: Sequenced numbered envelopes prepared by research team, block randomisation                      | Low risk: sealed opaque envelopes          | Low risk: no important differences and baseline scores were adjusted for in analysis | low risk: control were slightly more likely to be male and younger but otherwise comparable, this had no impact on results when adjusted for in analysis | Low risk: similar amounts of missing data in both arms, data on HCU available for 157 | Unclear risk: not reported if assessors were blinded or how health care utilisation data was obtained | Unclear risk: randomisation was at the patient level within practices. GPs were more interested in social interventions | Low risk: all outcomes were reported | Low risk: No other risks identified. Funded by Avon health authority, no competing interests declared. Low risk: low risk in 7 of 9 areas                                                                                                     |
| Kangovi et al, 2018, RCT, All cause hospital admissions 9 months | Low risk: computerised generated algorithm with blocks, performed by study team member not associated with | Low risk: centralised randomisation scheme | Low risk: Baseline outcome measures were similar                                     | Low risk: there were slightly more participants of hispanic ethnicity in one arm-0 vs 3.7%                                                               | Low risk: 100% data available for health care utilisation                             | Low risk- Hospitalisation data from routine sources and assessors/statisticians were blinded.         | Low risk: randomisation was at the patient level, however unlikely they received controls the intervention, so not a    | Low risk: all outcomes are reported  | The authors offer commercial consulting services on setting up similar CHW interventions Low risk: low risk of bias in 7/9 areas, and other areas unlikely to have significant impact on ROB. While the paper is at risk of overly presenting |

|    |                                                                                                                                            |                                                                                                                                |                                            |                                                                                                              |                                                                                                           |                                                           |                                                                                               |                                                                                                                                                    |                                      |                                                                                                                  |                                                                                                                                                          |                                                                        |
|----|--------------------------------------------------------------------------------------------------------------------------------------------|--------------------------------------------------------------------------------------------------------------------------------|--------------------------------------------|--------------------------------------------------------------------------------------------------------------|-----------------------------------------------------------------------------------------------------------|-----------------------------------------------------------|-----------------------------------------------------------------------------------------------|----------------------------------------------------------------------------------------------------------------------------------------------------|--------------------------------------|------------------------------------------------------------------------------------------------------------------|----------------------------------------------------------------------------------------------------------------------------------------------------------|------------------------------------------------------------------------|
| 1  | outcomes assessment                                                                                                                        |                                                                                                                                |                                            |                                                                                                              |                                                                                                           |                                                           |                                                                                               | major factor for overall ROB                                                                                                                       |                                      | positive findings all outcomes are reported along with statistical significance.                                 |                                                                                                                                                          |                                                                        |
| 2  |                                                                                                                                            |                                                                                                                                |                                            |                                                                                                              |                                                                                                           |                                                           |                                                                                               |                                                                                                                                                    |                                      |                                                                                                                  |                                                                                                                                                          |                                                                        |
| 3  |                                                                                                                                            |                                                                                                                                |                                            |                                                                                                              |                                                                                                           |                                                           |                                                                                               |                                                                                                                                                    |                                      |                                                                                                                  |                                                                                                                                                          |                                                                        |
| 4  |                                                                                                                                            |                                                                                                                                |                                            |                                                                                                              |                                                                                                           |                                                           |                                                                                               |                                                                                                                                                    |                                      |                                                                                                                  |                                                                                                                                                          |                                                                        |
| 5  |                                                                                                                                            |                                                                                                                                |                                            |                                                                                                              |                                                                                                           |                                                           |                                                                                               |                                                                                                                                                    |                                      |                                                                                                                  |                                                                                                                                                          |                                                                        |
| 6  |                                                                                                                                            |                                                                                                                                |                                            |                                                                                                              |                                                                                                           |                                                           |                                                                                               |                                                                                                                                                    |                                      |                                                                                                                  |                                                                                                                                                          |                                                                        |
| 7  |                                                                                                                                            |                                                                                                                                |                                            |                                                                                                              |                                                                                                           |                                                           |                                                                                               |                                                                                                                                                    |                                      |                                                                                                                  |                                                                                                                                                          |                                                                        |
| 8  |                                                                                                                                            |                                                                                                                                |                                            |                                                                                                              |                                                                                                           |                                                           |                                                                                               |                                                                                                                                                    |                                      |                                                                                                                  |                                                                                                                                                          |                                                                        |
| 9  |                                                                                                                                            |                                                                                                                                |                                            |                                                                                                              |                                                                                                           |                                                           |                                                                                               |                                                                                                                                                    |                                      |                                                                                                                  |                                                                                                                                                          |                                                                        |
| 10 |                                                                                                                                            |                                                                                                                                |                                            |                                                                                                              |                                                                                                           |                                                           |                                                                                               |                                                                                                                                                    |                                      |                                                                                                                  |                                                                                                                                                          |                                                                        |
| 11 | Kangovi et al, 2017, RCT, SF-12, all cause hospitalisations 1 year                                                                         | Low risk: computerised generated algorithm with blocks, performed by study team member not associated with outcomes assessment | Low risk: centralised randomisation scheme | Low risk: Baseline outcome measures were similar                                                             | Low risk: Intervention group were more likely to be employed 20% vs 8%                                    | Low risk: 100% data available for health care utilisation | Low risk- Hospitalisation data from routine sources and assessors/statisticians were blinded. | High risk: randomisation was at the patient level, however unlikely they received controls the intervention, so not a major factor for overall ROB | Low risk: all outcomes are reported  | The authors offer commercial consulting services on setting up similar CHW interventions                         | Low risk- low risk 7/9 areas and other domains such as allocation inherent to nature of intervention or contamination due to patient level randomisation | Overall RCTs: Low risk of bias                                         |
| 12 |                                                                                                                                            |                                                                                                                                |                                            |                                                                                                              |                                                                                                           |                                                           |                                                                                               |                                                                                                                                                    |                                      |                                                                                                                  |                                                                                                                                                          |                                                                        |
| 13 |                                                                                                                                            |                                                                                                                                |                                            |                                                                                                              |                                                                                                           |                                                           |                                                                                               |                                                                                                                                                    |                                      |                                                                                                                  |                                                                                                                                                          |                                                                        |
| 14 |                                                                                                                                            |                                                                                                                                |                                            |                                                                                                              |                                                                                                           |                                                           |                                                                                               |                                                                                                                                                    |                                      |                                                                                                                  |                                                                                                                                                          |                                                                        |
| 15 |                                                                                                                                            |                                                                                                                                |                                            |                                                                                                              |                                                                                                           |                                                           |                                                                                               |                                                                                                                                                    |                                      |                                                                                                                  |                                                                                                                                                          |                                                                        |
| 16 |                                                                                                                                            |                                                                                                                                |                                            |                                                                                                              |                                                                                                           |                                                           |                                                                                               |                                                                                                                                                    |                                      |                                                                                                                  |                                                                                                                                                          |                                                                        |
| 17 |                                                                                                                                            |                                                                                                                                |                                            |                                                                                                              |                                                                                                           |                                                           |                                                                                               |                                                                                                                                                    |                                      |                                                                                                                  |                                                                                                                                                          |                                                                        |
| 18 |                                                                                                                                            |                                                                                                                                |                                            |                                                                                                              |                                                                                                           |                                                           |                                                                                               |                                                                                                                                                    |                                      |                                                                                                                  |                                                                                                                                                          |                                                                        |
| 19 |                                                                                                                                            |                                                                                                                                |                                            |                                                                                                              |                                                                                                           |                                                           |                                                                                               |                                                                                                                                                    |                                      |                                                                                                                  |                                                                                                                                                          |                                                                        |
| 20 |                                                                                                                                            |                                                                                                                                |                                            |                                                                                                              |                                                                                                           |                                                           |                                                                                               |                                                                                                                                                    |                                      |                                                                                                                  |                                                                                                                                                          |                                                                        |
| 21 |                                                                                                                                            |                                                                                                                                |                                            |                                                                                                              |                                                                                                           |                                                           |                                                                                               |                                                                                                                                                    |                                      |                                                                                                                  |                                                                                                                                                          |                                                                        |
| 22 |                                                                                                                                            |                                                                                                                                |                                            |                                                                                                              |                                                                                                           |                                                           |                                                                                               |                                                                                                                                                    |                                      |                                                                                                                  |                                                                                                                                                          |                                                                        |
| 23 |                                                                                                                                            |                                                                                                                                |                                            |                                                                                                              |                                                                                                           |                                                           |                                                                                               |                                                                                                                                                    |                                      |                                                                                                                  |                                                                                                                                                          |                                                                        |
| 24 |                                                                                                                                            |                                                                                                                                |                                            |                                                                                                              |                                                                                                           |                                                           |                                                                                               |                                                                                                                                                    |                                      |                                                                                                                  |                                                                                                                                                          |                                                                        |
| 25 |                                                                                                                                            |                                                                                                                                |                                            |                                                                                                              |                                                                                                           |                                                           |                                                                                               |                                                                                                                                                    |                                      |                                                                                                                  |                                                                                                                                                          |                                                                        |
| 26 |                                                                                                                                            |                                                                                                                                |                                            |                                                                                                              |                                                                                                           |                                                           |                                                                                               |                                                                                                                                                    |                                      |                                                                                                                  |                                                                                                                                                          |                                                                        |
| 27 |                                                                                                                                            |                                                                                                                                |                                            |                                                                                                              |                                                                                                           |                                                           |                                                                                               |                                                                                                                                                    |                                      |                                                                                                                  |                                                                                                                                                          |                                                                        |
| 28 |                                                                                                                                            |                                                                                                                                |                                            |                                                                                                              |                                                                                                           |                                                           |                                                                                               |                                                                                                                                                    |                                      |                                                                                                                  |                                                                                                                                                          |                                                                        |
| 29 |                                                                                                                                            |                                                                                                                                |                                            |                                                                                                              |                                                                                                           |                                                           |                                                                                               |                                                                                                                                                    |                                      |                                                                                                                  |                                                                                                                                                          |                                                                        |
| 30 | Carnes et al, 2017, CBA, PC visits                                                                                                         | High risk: controlled before after study                                                                                       | High risk: CBA                             | High risk: significant differences in baseline scores, and controls were drawn from same population, but not | High risk: significant differences in living arrangement, education, status, adjustments for same did not | Low risk: use of anonymised GP data meant no missing data | Low risk- anonymised data from GP records                                                     | Low risk: the service was not available in areas where the control lived                                                                           | Low risk: all outcomes were reported | Low risk: No other risks identified. Funded by DoH, independent research group, no competing interests declared. | High risk: high risk in 4 of 9 areas                                                                                                                     | Overall nRCTs: High risk of bias due to control mismatch in particular |
| 31 |                                                                                                                                            |                                                                                                                                |                                            |                                                                                                              |                                                                                                           |                                                           |                                                                                               |                                                                                                                                                    |                                      |                                                                                                                  |                                                                                                                                                          |                                                                        |
| 32 |                                                                                                                                            |                                                                                                                                |                                            |                                                                                                              |                                                                                                           |                                                           |                                                                                               |                                                                                                                                                    |                                      |                                                                                                                  |                                                                                                                                                          |                                                                        |
| 33 |                                                                                                                                            |                                                                                                                                |                                            |                                                                                                              |                                                                                                           |                                                           |                                                                                               |                                                                                                                                                    |                                      |                                                                                                                  |                                                                                                                                                          |                                                                        |
| 34 |                                                                                                                                            |                                                                                                                                |                                            |                                                                                                              |                                                                                                           |                                                           |                                                                                               |                                                                                                                                                    |                                      |                                                                                                                  |                                                                                                                                                          |                                                                        |
| 35 |                                                                                                                                            |                                                                                                                                |                                            |                                                                                                              |                                                                                                           |                                                           |                                                                                               |                                                                                                                                                    |                                      |                                                                                                                  |                                                                                                                                                          |                                                                        |
| 36 |                                                                                                                                            |                                                                                                                                |                                            |                                                                                                              |                                                                                                           |                                                           |                                                                                               |                                                                                                                                                    |                                      |                                                                                                                  |                                                                                                                                                          |                                                                        |
| 37 |                                                                                                                                            |                                                                                                                                |                                            |                                                                                                              |                                                                                                           |                                                           |                                                                                               |                                                                                                                                                    |                                      |                                                                                                                  |                                                                                                                                                          |                                                                        |
| 38 |                                                                                                                                            |                                                                                                                                |                                            |                                                                                                              |                                                                                                           |                                                           |                                                                                               |                                                                                                                                                    |                                      |                                                                                                                  |                                                                                                                                                          |                                                                        |
| 39 |                                                                                                                                            |                                                                                                                                |                                            |                                                                                                              |                                                                                                           |                                                           |                                                                                               |                                                                                                                                                    |                                      |                                                                                                                  |                                                                                                                                                          |                                                                        |
| 40 |                                                                                                                                            |                                                                                                                                |                                            |                                                                                                              |                                                                                                           |                                                           |                                                                                               |                                                                                                                                                    |                                      |                                                                                                                  |                                                                                                                                                          |                                                                        |
| 41 |                                                                                                                                            |                                                                                                                                |                                            |                                                                                                              |                                                                                                           |                                                           |                                                                                               |                                                                                                                                                    |                                      |                                                                                                                  |                                                                                                                                                          |                                                                        |
| 42 |                                                                                                                                            |                                                                                                                                |                                            |                                                                                                              |                                                                                                           |                                                           |                                                                                               |                                                                                                                                                    |                                      |                                                                                                                  |                                                                                                                                                          |                                                                        |
| 43 | For peer review only - <a href="http://bmjopen.bmj.com/site/about/guidelines.xhtml">http://bmjopen.bmj.com/site/about/guidelines.xhtml</a> |                                                                                                                                |                                            |                                                                                                              |                                                                                                           |                                                           |                                                                                               |                                                                                                                                                    |                                      |                                                                                                                  |                                                                                                                                                          |                                                                        |
| 44 |                                                                                                                                            |                                                                                                                                |                                            |                                                                                                              |                                                                                                           |                                                           |                                                                                               |                                                                                                                                                    |                                      |                                                                                                                  |                                                                                                                                                          |                                                                        |
| 45 |                                                                                                                                            |                                                                                                                                |                                            |                                                                                                              |                                                                                                           |                                                           |                                                                                               |                                                                                                                                                    |                                      |                                                                                                                  |                                                                                                                                                          |                                                                        |
| 46 |                                                                                                                                            |                                                                                                                                |                                            |                                                                                                              |                                                                                                           |                                                           |                                                                                               |                                                                                                                                                    |                                      |                                                                                                                  |                                                                                                                                                          |                                                                        |



## Summary of findings:

**Social prescribing link workers compared to usual care for people with multimorbidity**

Patient or population: people with multimorbidity

Setting: Primary Care

Intervention: social prescribing link workers

Comparison: usual care

| Outcomes                                                                                                                                   | Impact                                                                                                                                                                                                                                                                                                                                   | № of participants (studies)    | Certainty of the evidence (GRADE) |
|--------------------------------------------------------------------------------------------------------------------------------------------|------------------------------------------------------------------------------------------------------------------------------------------------------------------------------------------------------------------------------------------------------------------------------------------------------------------------------------------|--------------------------------|-----------------------------------|
| Health related quality of life (RCTs) assessed with: SF-12 HRQoL measure follow-up: range 6 months to 9 months                             | Two RCTs reported no difference in the physical health component of the SF-12. One of these trials showed a positive impact on the mental health component of the SF-12 ( 2.3 vs -0.2 p= 0.008. ), but the other showed no difference.                                                                                                   | 894 (2 RCTs)                   | ⊕⊕○○<br>Low <sup>a,b</sup>        |
| Health related quality of life (CBAs) assessed with: EQ-5D and SF-12 HRQoL measures follow-up: range 3 months to 9 months                  | One CBA reported no difference in the MCS or PCS of the SF-12. The same trial reported a small change in the EQ-5D-3L in favour of the control group ( -0.09 (-0.14 to -0.03) p<0.001). The second CBA found no difference in the EQ-5D-5L.                                                                                              | 1292 (2 observational studies) | ⊕○○○<br>Very low <sup>c</sup>     |
| Mental Health (RCTs) assessed with: Mental Health as assessed by the hospital anxiety depression scale follow-up: mean 4 months            | One RCT found an improvement in the anxiety component of the HADS ( -1.9 (-3.0 to -0.7) a p=0.002 ) , but not the depression component (-0.9 (-1.9 to 0.2) p=0.116)                                                                                                                                                                      | 152 (1 RCT)                    | ⊕⊕○○<br>Low <sup>d,e</sup>        |
| Mental Health (CBAs) assessed with: Mental health as assessed by a screening tool for mental illness follow-up: range 3 months to 9 months | One CBA reported no difference in the geriatric depression scale. Two CBAs found no difference in the HADS anxiety or depression scales.                                                                                                                                                                                                 | 1772 (3 observational studies) | ⊕○○○<br>Very low <sup>f,g</sup>   |
| Social support and contacts (RCTs) follow-up: range 4 months to 24 months                                                                  | One RCT of a two year intervention for people aged over 75 found no difference in Tunstalls social contact score. One RCT of a one month intervention found no difference in Dukes Social Support Scale.                                                                                                                                 | 714 (2 RCTs)                   | ⊕⊕○○<br>Low <sup>h,i</sup>        |
| Social contacts and supports (CBAs) follow-up: mean 8 months                                                                               | One CBA looked at social support as measured by the Medical outcomes survey: social support scale and found no difference.                                                                                                                                                                                                               | 392 (1 observational study)    | ⊕○○○<br>Very low <sup>i</sup>     |
| Self rated health (RCTs) follow-up: range 4 months to 24 months                                                                            | Two RCTs examined self rated health. One using a simple scale reported a greater % improved in the intervention (20%) than control group (11%). The other used the WONCA-COOP functional health scale that includes a measure of overall health and found an improvement favouring the intervention group (-0.4 (-0.7 to -0.1) p=0.003). | 734 (2 RCTs)                   | ⊕⊕○○<br>Low <sup>k,l</sup>        |

Summary of findings:

Social prescribing link workers compared to usual care for people with multimorbidity

Patient or population: people with multimorbidity

Setting: Primary Care

Intervention: social prescribing link workers

Comparison: usual care

| Outcomes                                                                                                                                    | Impact                                                                                                                                                                                                                                                                                                                                                                                                                                                                                                                                                                                  | № of participants (studies)    | Certainty of the evidence (GRADE) |
|---------------------------------------------------------------------------------------------------------------------------------------------|-----------------------------------------------------------------------------------------------------------------------------------------------------------------------------------------------------------------------------------------------------------------------------------------------------------------------------------------------------------------------------------------------------------------------------------------------------------------------------------------------------------------------------------------------------------------------------------------|--------------------------------|-----------------------------------|
| Self rated health (CBAs) assessed with: Likert scale from 1 (poorest health) to 5 (best health) follow-up: mean 8 months                    | One CBA examined self rated health and found no difference between groups. ( 0.127 (-0.221, 0.9475) p=not reported )                                                                                                                                                                                                                                                                                                                                                                                                                                                                    | 480 (1 observational study)    | ⊕○○○ Very low <sup>m</sup>        |
| Physical Activities (RCTs) assessed with: Any measurement of daily activities or exercise follow-up: range 4 months to 24 months            | One RCT of 152 adults found an improvement in daily activities (Daily Activities -0.5 (-0.6 to -0.2) p=0.001) but no effect on physical fitness ( -0.3 (-0.6 to 0.05) p=0.98). The other of a 2 year intervention in adults over 75 found no difference in activities of daily living.                                                                                                                                                                                                                                                                                                  | 712 (2 RCTs)                   | ⊕○○○ Very low <sup>n,o,p</sup>    |
| Physical activities (CBAs) assessed with: Any measure of daily activities or exercise follow-up: mean 8.5 months                            | One CBA found no difference in self reported exercise. The other found a decrease in daily activities in the intervention group (-0.897 (-1.729 to -0.065) p=0.035).                                                                                                                                                                                                                                                                                                                                                                                                                    | 1380 (2 observational studies) | ⊕○○○ Very low <sup>q,r,s</sup>    |
| Hospitalisations (RCTs) assessed with: Number of hospital admissions and number of days hospitalised follow-up: range 9 months to 12 months | Two RCTs reported a decrease in hospitalisations in the intervention group. One found a reduction in days in hospital (300 days vs 471 days; absolute event rate reduction,65%) at nine months. The other reported a reduction in hospitalisations and hospital days in the intervention group-68 total hospitalizations (278 hospital days) versus 98 (414 hospital days) in the control group. Neither reached statistical significance.<br><br>A third RCT found no difference between groups for hospitalisations (adjusted IRR 0.97 (0.77, 1.24).<br><br>All trials were US based. | 4053 (3 RCTs)                  | ⊕⊕○○ Low <sup>t,u</sup>           |
| Primary Care Utilisation (RCTs) follow-up: range 4 months to 24 months                                                                      | Two UK RCTs found no difference between groups for contacts with the primary care team and one US RCT found an increase in ambulatory care costsfor the intervention group but not attendances.                                                                                                                                                                                                                                                                                                                                                                                         | 3873 (3 RCTs)                  | ⊕⊕○○ Low <sup>v,w</sup>           |
| Primary Care Utilisation (CBAs) follow-up: mean 8 months                                                                                    | The authors reported a reduction in the number of primary care visits in the intervention group and an increase in the control group, but because of baseline imbalances in the groups it was difficult to attribute this change to the intervention.                                                                                                                                                                                                                                                                                                                                   | 480 (1 observational study)    | ⊕○○○ Very low <sup>x,y</sup>      |



## Summary of findings:

**Social prescribing link workers compared to usual care for people with multimorbidity**

**Patient or population:** people with multimorbidity

**Setting:** Primary Care

**Intervention:** social prescribing link workers

**Comparison:** usual care

| Outcomes | Impact | № of participants (studies) | Certainty of the evidence (GRADE) |
|----------|--------|-----------------------------|-----------------------------------|
|----------|--------|-----------------------------|-----------------------------------|

\*The risk in the intervention group (and its 95% confidence interval) is based on the assumed risk in the comparison group and the **relative effect** of the intervention (and its 95% CI).

CI: confidence interval

**GRADE Working Group grades of evidence**

**High certainty:** we are very confident that the true effect lies close to that of the estimate of the effect.

**Moderate certainty:** we are moderately confident in the effect estimate: the true effect is likely to be close to the estimate of the effect, but there is a possibility that it is substantially different.

**Low certainty:** our confidence in the effect estimate is limited: the true effect may be substantially different from the estimate of the effect.

**Very low certainty:** we have very little confidence in the effect estimate: the true effect is likely to be substantially different from the estimate of effect.

**Explanations**

- a. The two RCTs examined a similar intervention but found different results for the MCS of the SF-12
- b. The two RCTs were conducted in a single health care setting and may not transfer to other healthcare settings
- c. One RCT looked at a deprived population over nine months, the other looked at an older, less deprived population over three months
- d. The population was less deprived than in other studies and the usual target populations for link worker interventions and the intervention was only one month long
- e. The confidence interval for anxiety included a change that was clinically insignificant.
- f. Risk of bias was high in one CBA due to missing data, baseline differences and in all due to blinding
- g. One CBA looked at an older less deprived population over three months, while the other two included a more deprived younger population over eight to nine months
- h. One study looked at a two year intervention in over 75s which would not be typical of link worker interventions. The other study looked at a less deprived population than usually targeted for link worker interventions
- i. One study did not provide confidence intervals and the other had a small sample size.
- j. The CBA looked at a less deprived population than usually targeted for link worker interventions.
- k. One study looked at participants aged over 75 with an intervention duration of 2 years, whereas the other was in a younger, less deprived population and intervention was 4 months.
- l. Studies used different measures, one being a subscale of the WONCA/COOP Functional Health questionnaire. One RCT had a small sample size of 152.

m. There were baseline differences between the intervention and control groups. There was a significant loss to follow up of almost 70%.

n. Studies used slightly different measures and had different findings

o. One study looked at a two year intervention and another at a one month intervention. Populations differed with one being adults over 75, older than the typical social prescribing population targeted and the other less deprived.

p. One study did not report any confidence interval so cannot assess imprecision

q. One CBA had baseline differences between the intervention and control group and significant loss to follow up of almost 70%.

r. Studies used different measures and had slightly different results.

s. One study did not provide confidence intervals so imprecision could not be assessed.

t. The three RCTs were conducted in a US healthcare setting and may not transfer to other settings. The intervention was also longer and more intense than other social prescribing interventions.

u. Neither study found a statistically significant reductions in hospitalisations or days in hospital but there was a trend towards significance. The third study did not find a difference.

v. One RCT looked at a two year intervention for the over 75s. The other looked at a younger less deprived population than usually targeted for social prescribing interventions. The third at a predominantly Black US population.

w. Neither UK RCT reported confidence intervals or results of statistical analysis making it difficult to comment on precision.

x. The CBA had baseline imbalances between groups and almost 70% loss to follow up

y. The baseline attendance rates between the two groups were very different and findings likely reflect regression to the mean.

| Study ID             | Primary Outcomes: Results                                                                                                                                                                                                                         | Secondary Outcomes: Results                                                                                                                                                                                                                                                                                                                                                                                                                                                                                                                                                                                                                                                                                                                                                                                                                                                                                                                            |
|----------------------|---------------------------------------------------------------------------------------------------------------------------------------------------------------------------------------------------------------------------------------------------|--------------------------------------------------------------------------------------------------------------------------------------------------------------------------------------------------------------------------------------------------------------------------------------------------------------------------------------------------------------------------------------------------------------------------------------------------------------------------------------------------------------------------------------------------------------------------------------------------------------------------------------------------------------------------------------------------------------------------------------------------------------------------------------------------------------------------------------------------------------------------------------------------------------------------------------------------------|
| Clarke et al, RCT 19 | Survival (% at 3.5 years) 73% in Intervention vs. 78% in control. Reported as non-significant.                                                                                                                                                    | Activities of daily living, loneliness (Wenger scale), morale (Geriatric Morale Scale), social contact score (Tunstall): no significant changes at 2 years. Information orientation score: not reported. Self-perceived health (% improved): 20% Intervention, 11% Control - reported as significant. HCU: 17% and 12% of both groups had seen GP and PHN respectively in previous month - reported as non-significant.                                                                                                                                                                                                                                                                                                                                                                                                                                                                                                                                |
| Grant et al          | Mental Health: Anxiety (HADS-A) -1.9 (-3.0 to -0.7) <sup>a</sup> p=0.002, Depression (HADS-D) -0.9 (-1.9 to 0.2) p=0.116. Social Support (Dukes Social Support Scale): Confidant -0.9 (-2.4 to 0.6) p=0.221, Affective -0.3 (-1.2 to 0.7) p=0.594 | Quality of life (delighted terrible faces scale): -0.5 (-0.9 to -0.1) p=0.006. Functional health (COOP/WONCA functional health assessment scale): Pain -0.5 (-0.8 to -0.1), Physical fitness -0.3 (-0.6 to 0.05) p=0.98, Feelings -0.5, (-0.8 to -0.2), Daily Activities -0.5 (-0.6 to -0.2) p=0.001, Social Activities -0.3 (-0.6 to 0.1) p=0.196, Change in health -0.3 (-0.6 to -0.03) p=0.03, Overall Health -0.4 (-0.7 to -0.1) p=0.003. HCU: both groups had similar contacts with the PCT, but the intervention group were reported as having more prescriptions, including mental health prescriptions and fewer referrals to general and mental health services, although no statistical analysis was performed.                                                                                                                                                                                                                              |
| Kangovi et al, 2018  | Health Related Quality of Life (HRQoL), Physical Health Component (SF-12-V2 PCS) -0.7 (-2.2 to 0.7) <sup>b</sup> p=0.3                                                                                                                            | HRQoL Mental Health Component (SF-12-V2 MCS) 0.8 (-1.1 to 2.6) <sup>b</sup> p=0.3. Patient Activation (PAM score): 1.9 (-0.1 to 3.8) p=0.06. Chronic disease control: HBA1c -0.2 (-1.3 to 0.9), BMI -0.2 (-0.7 to 0.4), CPD -0.5 (-2.2 to 1.2), SBP -6.3 (-14.3 to 1.8). Patient reported quality of primary care: Intervention group were more likely to report highest rating for quality comprehensive care and supportiveness for self-management - risk difference 0.12 p=<0.001. HCU: Intervention group had fewer repeat admissions -0.24 (-0.40 to -0.07) p=0.02 and 30d readmissions -0.17 (-0.32 to -0.02) p=0.04, fewer total hospital days (300 vs 471) and statistically non significant fewer total hospitalisations -0.3 (-0.6 to 0.0) p=0.07 and shorter length of stay -3.1 (-6.3 to 0.2) p=0.06.                                                                                                                                     |
| Kangovi et al, 2017  | Change in chronic disease control: HBA1C -0.2 (-1.3 to 0.9) <sup>c</sup> , BMI -0.2 (-0.7 to 0.4), CPD -0.5 (-2.2 to 1.2), SBP -6.3 (-14.3 to 1.8) p=0.08                                                                                         | Achievement of chronic disease management goals (% achieved) 18.3% vs 17.2% p=0.81. HRQoL Physical Health Component (change in SF-12-V2 PCS): 0.9 vs 0.5 p=0.67 and HRQoL Mental Health Component (change in SF-12-V2 MCS) 2.3 vs -0.2 p=0.008. Patient activation (change in PAM) 2.2 vs 1.5 p=0.66. Proportion of people reporting high quality of patient centred care that was comprehensive (49.2% vs 39.7% p=0.01) and supportive of disease management (62.9% vs 38% p=0.001). HCU: Intervention group had a total of 68 hospitalisations with 278 hospital days vs 98 hospitalisations and 414 hospital days in the control p=0.17.                                                                                                                                                                                                                                                                                                            |
| Carnes et al         | Not specified                                                                                                                                                                                                                                     | Self rated health (scale 1 to 5): 0.127 (-0.221 to 0.9475) <sup>d</sup> . Mental health, anxiety (HADS-A): -0.119 (-0.847 to 1.609). Mental health, depression (HADS-D): 0.857 (-0.737 to 2.451) Wellbeing (Scale of 0-6 in last week): -0.013 (-0.623 to 0.596). Positive and active engagement in life (HeiQ Scale 0-20): -0.073 (-1.278 to 1.131). Number of regular activities (range 0-6): -0.897 (-1.729 to -0.065) p=0.035. HCU: A&E visits in the previous 3 months (mean (SD): Intervention 0.3 (0.68), Control 0.5 (1.15), but no baseline rate reported for the intervention group. Annual GP consultation rate before referral decreased in the intervention group and slightly increased in the control group, but there were significant baseline differences- Intervention 8.3 to 7.3, p=0.001, Control 2.9 to 3.3 p=0.014 and p=<0.001 for between group differences at baseline and follow up. The intervention group were prescribed |

|                                                                                                                                                                                                                                                                                                                                                                                                                                                                                                                                                                                                                                                                                                                                                                                                                                                                                                                                                                                                                                                                                                                                                                                                                                                                                                                                                                                                                                                                                                                                                                                                                                                                                                                                                                                                                                                                                                                                                                                                                                                                                                                                                                                                                                                                                                                                                                                                                                                                                                                                                                        |                                                                                                  |                                                                                                                                                                                                                                                                                                                                                                                                                                                                                                                                                                                                                                                                          |
|------------------------------------------------------------------------------------------------------------------------------------------------------------------------------------------------------------------------------------------------------------------------------------------------------------------------------------------------------------------------------------------------------------------------------------------------------------------------------------------------------------------------------------------------------------------------------------------------------------------------------------------------------------------------------------------------------------------------------------------------------------------------------------------------------------------------------------------------------------------------------------------------------------------------------------------------------------------------------------------------------------------------------------------------------------------------------------------------------------------------------------------------------------------------------------------------------------------------------------------------------------------------------------------------------------------------------------------------------------------------------------------------------------------------------------------------------------------------------------------------------------------------------------------------------------------------------------------------------------------------------------------------------------------------------------------------------------------------------------------------------------------------------------------------------------------------------------------------------------------------------------------------------------------------------------------------------------------------------------------------------------------------------------------------------------------------------------------------------------------------------------------------------------------------------------------------------------------------------------------------------------------------------------------------------------------------------------------------------------------------------------------------------------------------------------------------------------------------------------------------------------------------------------------------------------------------|--------------------------------------------------------------------------------------------------|--------------------------------------------------------------------------------------------------------------------------------------------------------------------------------------------------------------------------------------------------------------------------------------------------------------------------------------------------------------------------------------------------------------------------------------------------------------------------------------------------------------------------------------------------------------------------------------------------------------------------------------------------------------------------|
|                                                                                                                                                                                                                                                                                                                                                                                                                                                                                                                                                                                                                                                                                                                                                                                                                                                                                                                                                                                                                                                                                                                                                                                                                                                                                                                                                                                                                                                                                                                                                                                                                                                                                                                                                                                                                                                                                                                                                                                                                                                                                                                                                                                                                                                                                                                                                                                                                                                                                                                                                                        |                                                                                                  | significantly more medications at baseline and follow up than control p <0.001.                                                                                                                                                                                                                                                                                                                                                                                                                                                                                                                                                                                          |
| Dickens et al                                                                                                                                                                                                                                                                                                                                                                                                                                                                                                                                                                                                                                                                                                                                                                                                                                                                                                                                                                                                                                                                                                                                                                                                                                                                                                                                                                                                                                                                                                                                                                                                                                                                                                                                                                                                                                                                                                                                                                                                                                                                                                                                                                                                                                                                                                                                                                                                                                                                                                                                                          | Health Related Quality of Life, Mental Health Component (SF-12 MCS) 0.1 (-1.9, 2.1) <sup>e</sup> | HRQoL Physical Health Component (SF-12 PCS): 0.1 (-1.9 to 2.10) p=0.9. HRQoL (EQ-5D-3L): -0.09 (-0.14 to -0.03) p<0.001. Depression (GDS): 0.2 (-0.2 to 0.7) p=0.29. Social Support (MOS-6): 0.03 (-0.2 to 0.2) p=0.75. Social Activities: No significant differences were reported between groups for number of friends/family, club/group membership or frequency of get together with friends/family. The intervention group were less likely to report getting along with others (OR 0.6 (0.4 to 0.9) p<0.01). Social Participation (General Household Survey items on housework, transport, childcare, advice, emotional support) was not different between groups. |
| Mercer et al                                                                                                                                                                                                                                                                                                                                                                                                                                                                                                                                                                                                                                                                                                                                                                                                                                                                                                                                                                                                                                                                                                                                                                                                                                                                                                                                                                                                                                                                                                                                                                                                                                                                                                                                                                                                                                                                                                                                                                                                                                                                                                                                                                                                                                                                                                                                                                                                                                                                                                                                                           | Health Related Quality of Life (EQ-5D-5L) 0.008 (-0.028 to 0.045) <sup>f</sup>                   | Well-being (ICECAP-A): -0.011 (-0.039 to 0.016) p=0.411. Mental health, anxiety (HADS-A): -0.41 (-0.99 to 0.18) p=0.172. Mental health, depression (HADS-D): 0.09 (-0.49 to 0.68) p=0.753. Work and social adjustment scale: 0.05 (-1.37 to 1.48) p=0.940. Self-reported lifestyle activities (smoking, alcohol, exercise): no difference between groups.                                                                                                                                                                                                                                                                                                                |
| <p><sup>a</sup> Mean Difference (95% CI) adjusted for baseline results. <sup>b</sup> Longitudinal estimated difference in difference (95% CI) from 6 to 9 months adjusted for site and chronic disease. <sup>c</sup> Difference in difference (95% CI) controlled for baseline results and any imbalanced baseline variables <sup>d</sup> Mean difference (95% CI) adjusted for age, sex, ethnicity, employment status and living arrangement. <sup>e</sup> Mean difference (95% CI) adjusted for employment status, accommodation type and living circumstances. <sup>f</sup> Mean difference (95% CI) adjusted for age, sex, SIMD, comorbidity, and significant baseline outcome measures as covariates and includes practice identifier as a random effects term.</p> <p>SF-12V2= Short Form Health Survey, is often used as a health related quality of life measure, with Physical (PCS) and Mental (MCS) health components reported separately on a scale of 0-100 with 100 representing maximal health. EQ-5D-5L=a standardized measure of self-reported health-related quality of life that assesses 5 dimensions at 5 levels of severity where 1 is the preferred state of health. EQ-5D-3L=an earlier version of EQ-5D-5L with 3 levels. GDS =Geriatric Depression Scale, a screening tool for depression in older people with a score of 4 or more indicating possible depression. HADS = Hospital Anxiety and Depression Scale measured on a scale of 0-42 where a higher score indicates worse mental health. HADS-A=Hospital Anxiety and Depression Scale, Anxiety, where a score above 10 indicates possible caseness; HADS-D=Hospital Anxiety and Depression Scale, Depression, where a score above 10 indicates possible caseness. Duke UNC Functional Social support scale measures an individual's social network, a higher score indicates stronger supports. MOS-6 Social support (six items from the Medical Outcomes Study Social Support Survey [MOS-SSS] where a higher score on scale of 1-6 indicates more support. ICECAPA= Investigating Choice Experiments for the Preferences of Older People Capability Measure for Adults, a capability based wellbeing measure for adults where 0 is no capability and 1 is full capability; WASAS = Work and Social Adjustment Scale that measures impact of mental health problems on daily life with higher scores denoting a greater impact.</p> <p>BMI=body mass index, CPD= cigarettes per day, SBP=systolic blood pressure, HbA1C=glycosylated haemoglobin, decrease denotes improvement.</p> |                                                                                                  |                                                                                                                                                                                                                                                                                                                                                                                                                                                                                                                                                                                                                                                                          |

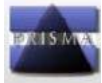

## PRISMA 2020 for Abstracts Checklist

1  
2  
3  
4  
5  
6  
7  
8  
9  
10  
11  
12  
13  
14  
15  
16  
17  
18  
19  
20  
21  
22  
23  
24  
25  
26  
27  
28  
29  
30  
31  
32  
33  
34  
35  
36  
37  
38  
39  
40  
41  
42  
43  
44  
45  
46  
47

| Section and Topic       | Item # | Checklist item                                                                                                                                                                                                                                                                                        | Reported (Yes/No) |
|-------------------------|--------|-------------------------------------------------------------------------------------------------------------------------------------------------------------------------------------------------------------------------------------------------------------------------------------------------------|-------------------|
| <b>TITLE</b>            |        |                                                                                                                                                                                                                                                                                                       |                   |
| Title                   | 1      | Identify the report as a systematic review.                                                                                                                                                                                                                                                           | Yes               |
| <b>BACKGROUND</b>       |        |                                                                                                                                                                                                                                                                                                       |                   |
| Objectives              | 2      | Provide an explicit statement of the main objective(s) or question(s) the review addresses.                                                                                                                                                                                                           | Yes               |
| <b>METHODS</b>          |        |                                                                                                                                                                                                                                                                                                       |                   |
| Eligibility criteria    | 3      | Specify the inclusion and exclusion criteria for the review.                                                                                                                                                                                                                                          | Yes               |
| Information sources     | 4      | Specify the information sources (e.g. databases, registers) used to identify studies and the date when each was last searched.                                                                                                                                                                        | Yes               |
| Risk of bias            | 5      | Specify the methods used to assess risk of bias in the included studies.                                                                                                                                                                                                                              |                   |
| Synthesis of results    | 6      | Specify the methods used to present and synthesise results.                                                                                                                                                                                                                                           | Yes               |
| <b>RESULTS</b>          |        |                                                                                                                                                                                                                                                                                                       |                   |
| Included studies        | 7      | Give the total number of included studies and participants and summarise relevant characteristics of studies.                                                                                                                                                                                         | Yes               |
| Synthesis of results    | 8      | Present results for main outcomes, preferably indicating the number of included studies and participants for each. If meta-analysis was done, report the summary estimate and confidence/credible interval. If comparing groups, indicate the direction of the effect (i.e. which group is favoured). | Yes               |
| <b>DISCUSSION</b>       |        |                                                                                                                                                                                                                                                                                                       |                   |
| Limitations of evidence | 9      | Provide a brief summary of the limitations of the evidence included in the review (e.g. study risk of bias, inconsistency and imprecision).                                                                                                                                                           | Yes               |
| Interpretation          | 10     | Provide a general interpretation of the results and important implications.                                                                                                                                                                                                                           | Yes               |
| <b>OTHER</b>            |        |                                                                                                                                                                                                                                                                                                       |                   |
| Funding                 | 11     | Specify the primary source of funding for the review.                                                                                                                                                                                                                                                 | Yes               |
| Registration            | 12     | Provide the register name and registration number.                                                                                                                                                                                                                                                    | Yes               |

From: Page MJ, McKenzie JE, Bossuyt PM, Boutron I, Hoffmann TC, Mulrow CD, et al. The PRISMA 2020 statement: an updated guideline for reporting systematic reviews. *BMJ* 2021;372:n71. doi: 10.1136/bmj.n71

For more information, visit: <http://www.prisma-statement.org/>
