# Supplementary material for: Effect of social prescribing link workers on health outcomes and costs for adults in primary care and community settings: a systematic review
Source: PubMed Central journal article supplement — BMJ Open. 2022 Sep 14;12(10):e062951. doi: 10.1136/bmjopen-2022-062951 (PMC9644316; doi:10.1136/bmjopen-2022-062951), 2022-09-14
Supplement: bmjopen-2022-062951.reviewer_comments.pdf [file bmjopen-2022-062951.reviewer_comments.pdf]

## PEER REVIEW HISTORY

BMJ Open publishes all reviews undertaken for accepted manuscripts. Reviewers are asked to complete a checklist review form (<http://bmjopen.bmj.com/site/about/resources/checklist.pdf>) and are provided with free text boxes to elaborate on their assessment. These free text comments are reproduced below.

### ARTICLE DETAILS

|                            |                                                                                                                                               |
|----------------------------|-----------------------------------------------------------------------------------------------------------------------------------------------|
| <b>TITLE (PROVISIONAL)</b> | Effect of social prescribing link workers on health outcomes and costs for adults in primary care and community settings: a systematic review |
| <b>AUTHORS</b>             | Kiely, Bridget; Croke, Aisling; O'Shea, Muireann; Boland, Fiona; O'Shea, Eamon; Connolly, Deirdre; Smith, Susan                               |

### VERSION 1 – REVIEW

|                        |                                                                                                |
|------------------------|------------------------------------------------------------------------------------------------|
| <b>REVIEWER</b>        | Stephanie Tierney<br>University of Oxford, Nuffield Department of Primary Care Health Sciences |
| <b>REVIEW RETURNED</b> | 02-May-2022                                                                                    |

|                         |                                                                                                                                                                                                                                                                                                                                                                                                                                                                                                                                                                                                                                                                                                                                                                                                                                                                                                                                                                                                                                                                                                                                                                                                                                                                                                                                                                                                                                                                                                                                                                                                                                                                                                                                                                                                                                                                                                                                                                            |
|-------------------------|----------------------------------------------------------------------------------------------------------------------------------------------------------------------------------------------------------------------------------------------------------------------------------------------------------------------------------------------------------------------------------------------------------------------------------------------------------------------------------------------------------------------------------------------------------------------------------------------------------------------------------------------------------------------------------------------------------------------------------------------------------------------------------------------------------------------------------------------------------------------------------------------------------------------------------------------------------------------------------------------------------------------------------------------------------------------------------------------------------------------------------------------------------------------------------------------------------------------------------------------------------------------------------------------------------------------------------------------------------------------------------------------------------------------------------------------------------------------------------------------------------------------------------------------------------------------------------------------------------------------------------------------------------------------------------------------------------------------------------------------------------------------------------------------------------------------------------------------------------------------------------------------------------------------------------------------------------------------------|
| <b>GENERAL COMMENTS</b> | <p>Thank you for the opportunity to comment on this systematic review of link workers providing social prescribing. There are some comments that I have to make to the authors in relation to the paper:</p> <p>Methods</p> <ul style="list-style-type: none"><li>• The decision to compare services across countries – given the variation in how social prescribing is applied in different countries (there is a new paper on this about to come out in BMJ Global Health), I wonder if this had been an area of consideration by the team? As only two countries were reflected in included papers, this was perhaps not an issue, although it is something to consider when synthesising papers on interventions that are context dependent.</li><li>• It was good to see the range of terms used to try and identify papers. Perhaps there could be a reference to the following paper that highlighted the range of terms used in England (<a href="https://bjgp.org/content/69/687/e675.abstract">https://bjgp.org/content/69/687/e675.abstract</a>).</li><li>• The authors had face-to-face interaction as an inclusion criteria. Perhaps there needs to be some reflection on this in light of how link workers have and continue to work because of the pandemic – remote working has been adopted and continues to be used or is mixed with face-to-face interactions.</li><li>• Data management – how were data that were extracted managed? Excel? Excel and Word?</li><li>• Page 11 – at the start of the section on the review process, what was meant by 'clearly ineligible titles'? Can some examples of what constituted clearly ineligible be given?</li></ul> <p>Results</p> <ul style="list-style-type: none"><li>• I presume that papers also did not give information about how long interactions were between a patient and a link worker (e.g. number of minutes per patient)? Whether the interactions were short or medium or long?</li></ul> |
|-------------------------|----------------------------------------------------------------------------------------------------------------------------------------------------------------------------------------------------------------------------------------------------------------------------------------------------------------------------------------------------------------------------------------------------------------------------------------------------------------------------------------------------------------------------------------------------------------------------------------------------------------------------------------------------------------------------------------------------------------------------------------------------------------------------------------------------------------------------------------------------------------------------------------------------------------------------------------------------------------------------------------------------------------------------------------------------------------------------------------------------------------------------------------------------------------------------------------------------------------------------------------------------------------------------------------------------------------------------------------------------------------------------------------------------------------------------------------------------------------------------------------------------------------------------------------------------------------------------------------------------------------------------------------------------------------------------------------------------------------------------------------------------------------------------------------------------------------------------------------------------------------------------------------------------------------------------------------------------------------------------|

|  |                                                                                                                                                                                                                                                                                                                                                                                                                                                                                                                                                                                                                                                                                                                                                                                                                                                                                                                                                                                                                                                                                                                                                                                                                                                                                                                                                                                                                                                                                                                                                                                                                                                                                                                                                                                                                                                                                                                                                                                                                                                                                                                                                                                                                                                                                                                                                                                                                                                                                                                                 |
|--|---------------------------------------------------------------------------------------------------------------------------------------------------------------------------------------------------------------------------------------------------------------------------------------------------------------------------------------------------------------------------------------------------------------------------------------------------------------------------------------------------------------------------------------------------------------------------------------------------------------------------------------------------------------------------------------------------------------------------------------------------------------------------------------------------------------------------------------------------------------------------------------------------------------------------------------------------------------------------------------------------------------------------------------------------------------------------------------------------------------------------------------------------------------------------------------------------------------------------------------------------------------------------------------------------------------------------------------------------------------------------------------------------------------------------------------------------------------------------------------------------------------------------------------------------------------------------------------------------------------------------------------------------------------------------------------------------------------------------------------------------------------------------------------------------------------------------------------------------------------------------------------------------------------------------------------------------------------------------------------------------------------------------------------------------------------------------------------------------------------------------------------------------------------------------------------------------------------------------------------------------------------------------------------------------------------------------------------------------------------------------------------------------------------------------------------------------------------------------------------------------------------------------------|
|  | <ul style="list-style-type: none"> <li>• Any information on the professional background/prior background of link workers in the studies?</li> <li>• Any information about how many things patients were connected to in the community? Any information in papers about the sorts of things papers were referred on to?</li> <li>• Were Kangovi et al. 2017 and 2018 different studies or just reporting on different elements of the same study?</li> <li>• It was interesting to note a lack of increase in social support in included studies (page 22) – given that social capital development has been proposed as a key component of bringing anticipated benefits in social prescribing (<a href="https://bmcmmedicine.biomedcentral.com/articles/10.1186/s12916-020-1510-7">https://bmcmmedicine.biomedcentral.com/articles/10.1186/s12916-020-1510-7</a>). This would seem to fit with the finding of a lack of improvement in loneliness. Perhaps if this is not addressed sufficiently then benefits in terms of quality of life and cost savings will not arise?</li> </ul> <p>Discussion</p> <ul style="list-style-type: none"> <li>• There could be some reflection here about the difficulties of a trial type design for this type of intervention. What is likely to be happening is that it works for some people, in certain situations for specific reasons – taking a binary approach (works/doesn't work) is probably too blunt for a complex intervention like this – which is shaped by contextual factors and relationships.</li> <li>• Mention of the PAM on page 29 – I am not sure if this is still recommended for use.</li> </ul> <p>Implications for practice</p> <ul style="list-style-type: none"> <li>• Perhaps reflect on changes that may come about due to COVID (e.g. more remote working, shorter appointments) – this may mean there is not enough time to legitimise the link worker role as a credible alternative to medical care from the perspective of patients (as suggested in a previous realist review - <a href="https://bmcmmedicine.biomedcentral.com/articles/10.1186/s12916-020-1510-7">https://bmcmmedicine.biomedcentral.com/articles/10.1186/s12916-020-1510-7</a>).</li> </ul> <p>Conclusion</p> <ul style="list-style-type: none"> <li>• Page 30 – the line about cost savings ('The opportunity costs of investing in social prescribing may be considerable') – perhaps make very clear that there is a lack of evidence to make this claim at present.</li> </ul> |
|--|---------------------------------------------------------------------------------------------------------------------------------------------------------------------------------------------------------------------------------------------------------------------------------------------------------------------------------------------------------------------------------------------------------------------------------------------------------------------------------------------------------------------------------------------------------------------------------------------------------------------------------------------------------------------------------------------------------------------------------------------------------------------------------------------------------------------------------------------------------------------------------------------------------------------------------------------------------------------------------------------------------------------------------------------------------------------------------------------------------------------------------------------------------------------------------------------------------------------------------------------------------------------------------------------------------------------------------------------------------------------------------------------------------------------------------------------------------------------------------------------------------------------------------------------------------------------------------------------------------------------------------------------------------------------------------------------------------------------------------------------------------------------------------------------------------------------------------------------------------------------------------------------------------------------------------------------------------------------------------------------------------------------------------------------------------------------------------------------------------------------------------------------------------------------------------------------------------------------------------------------------------------------------------------------------------------------------------------------------------------------------------------------------------------------------------------------------------------------------------------------------------------------------------|

|                        |                                               |
|------------------------|-----------------------------------------------|
| <b>REVIEWER</b>        | Martin Gulliford<br>King's College London, UK |
| <b>REVIEW RETURNED</b> | 12-May-2022                                   |

|                         |                                                                                                                                                                                                                                                                                                                                                                                                                                                                                                                                                                                                                                                                            |
|-------------------------|----------------------------------------------------------------------------------------------------------------------------------------------------------------------------------------------------------------------------------------------------------------------------------------------------------------------------------------------------------------------------------------------------------------------------------------------------------------------------------------------------------------------------------------------------------------------------------------------------------------------------------------------------------------------------|
| <b>GENERAL COMMENTS</b> | <p>This is a well written paper on a topical subject. There are only minor issues that could be addressed before publication:</p> <ol style="list-style-type: none"> <li>1. In the Asbtract, please comment on the quality of the evidence reviewed.</li> <li>2. In the Abstract Results and Discussion, please adjust the wording to make clear the distinction between absence of evidence and evidence of absence: <a href="https://www.bmj.com/content/311/7003/485">https://www.bmj.com/content/311/7003/485</a></li> <li>3. The included studies might possibly have been naive to think that a link worker would have short term imp[acts on QoL. In the</li> </ol> |
|-------------------------|----------------------------------------------------------------------------------------------------------------------------------------------------------------------------------------------------------------------------------------------------------------------------------------------------------------------------------------------------------------------------------------------------------------------------------------------------------------------------------------------------------------------------------------------------------------------------------------------------------------------------------------------------------------------------|

|  |                                                                                                                                                                                              |
|--|----------------------------------------------------------------------------------------------------------------------------------------------------------------------------------------------|
|  | Discussion, it might be worth suggesting a possible logic model for how the link worker might have effect. This could lead to suggestions for more appropriate process and outcome measures. |
|--|----------------------------------------------------------------------------------------------------------------------------------------------------------------------------------------------|

|                        |                                                                      |
|------------------------|----------------------------------------------------------------------|
| <b>REVIEWER</b>        | Adrienne Sabety<br>University of Notre Dame, Department of Economics |
| <b>REVIEW RETURNED</b> | 18-May-2022                                                          |

|                         |                                                                                                                                                                                                                                                                                                                                                                                                                                                                                                                                                                                                                                                                                                                                                                                                                                                                                                                                                                                                                                                                                                                                                                                                                                                                                                                                                                                                                                                                                                                                                                                                                                                                                                                                                                                                                                                                                                                                                                                                                                                                                                                                                                                                                                                                                                                                                                                                                                                                                                               |
|-------------------------|---------------------------------------------------------------------------------------------------------------------------------------------------------------------------------------------------------------------------------------------------------------------------------------------------------------------------------------------------------------------------------------------------------------------------------------------------------------------------------------------------------------------------------------------------------------------------------------------------------------------------------------------------------------------------------------------------------------------------------------------------------------------------------------------------------------------------------------------------------------------------------------------------------------------------------------------------------------------------------------------------------------------------------------------------------------------------------------------------------------------------------------------------------------------------------------------------------------------------------------------------------------------------------------------------------------------------------------------------------------------------------------------------------------------------------------------------------------------------------------------------------------------------------------------------------------------------------------------------------------------------------------------------------------------------------------------------------------------------------------------------------------------------------------------------------------------------------------------------------------------------------------------------------------------------------------------------------------------------------------------------------------------------------------------------------------------------------------------------------------------------------------------------------------------------------------------------------------------------------------------------------------------------------------------------------------------------------------------------------------------------------------------------------------------------------------------------------------------------------------------------------------|
| <b>GENERAL COMMENTS</b> | <p>This is a systematic review of link workers across UK and US contexts. I believe the work does as it sets out to do, although I have several suggestions to help the clarity of the manuscript.</p> <ul style="list-style-type: none"> <li>- The search is a year old – it should be refreshed</li> <li>- The authors should define link workers up front, ideally in both the abstract and introduction. <ul style="list-style-type: none"> <li>o There are a number of different terms used for these workers (at least given my understanding), e.g. community health workers, patient navigators, case managers, etc. Would suggest making this clear</li> </ul> </li> <li>- I was confused about the relationship btw link workers and social prescribing. The discussion frames around social prescribing, whereas the intro talks about link workers. Neither term was clearly defined, much less the intersection btw the two. <ul style="list-style-type: none"> <li>o I suggest streamlining the terminology around link workers or social prescribing, instead of using the two interchangeably.</li> </ul> </li> <li>- The authors search criteria do not seem all inclusive. E.g. I would think that case manager and social worker should be included.</li> <li>- I would suggest the authors make it clear in the introduction why this is an important topic</li> <li>- There are a number of places where the use of citations would be helpful. E.g. line 39 in the introduction.</li> <li>- The UK and US environments are extremely different, especially for something like link workers. For instance, baseline access issues are quite important in the US context. As a result, the country is extremely important to contextualizing the results in Table 2 and I would suggest adding this information.</li> <li>- Is there a way to report results in Table 1 as well? This would help the reader see and think through the mechanics a bit more. Perhaps you can combine Table 1 with Table 3?</li> <li>- Table 3 only reports adjusted mean differences. In order to interpret across studies, and to have a sense of relative magnitudes, authors should also report means.</li> <li>- I believe Table 3 notes only defines SF12v2, not SF12 PCS. Please make clear what these both are.</li> <li>- I wanted more in the discussion about what we can learn from these studies, as well as what we cannot.</li> <li>- Please make text font consistent throughout</li> </ul> |
|-------------------------|---------------------------------------------------------------------------------------------------------------------------------------------------------------------------------------------------------------------------------------------------------------------------------------------------------------------------------------------------------------------------------------------------------------------------------------------------------------------------------------------------------------------------------------------------------------------------------------------------------------------------------------------------------------------------------------------------------------------------------------------------------------------------------------------------------------------------------------------------------------------------------------------------------------------------------------------------------------------------------------------------------------------------------------------------------------------------------------------------------------------------------------------------------------------------------------------------------------------------------------------------------------------------------------------------------------------------------------------------------------------------------------------------------------------------------------------------------------------------------------------------------------------------------------------------------------------------------------------------------------------------------------------------------------------------------------------------------------------------------------------------------------------------------------------------------------------------------------------------------------------------------------------------------------------------------------------------------------------------------------------------------------------------------------------------------------------------------------------------------------------------------------------------------------------------------------------------------------------------------------------------------------------------------------------------------------------------------------------------------------------------------------------------------------------------------------------------------------------------------------------------------------|

**VERSION 1 – AUTHOR RESPONSE**

| Reviewer 1                                                                                                                                                                                                                                                                                                                                                                                                                                                                      |                                                                                                                                                                                                                                                                                                                                                                                                                                                                                                                                                                                                                                                                                                                                                                                                                                                                                                                                                                                                                                                                                                                                                                                                                                                                                                               |
|---------------------------------------------------------------------------------------------------------------------------------------------------------------------------------------------------------------------------------------------------------------------------------------------------------------------------------------------------------------------------------------------------------------------------------------------------------------------------------|---------------------------------------------------------------------------------------------------------------------------------------------------------------------------------------------------------------------------------------------------------------------------------------------------------------------------------------------------------------------------------------------------------------------------------------------------------------------------------------------------------------------------------------------------------------------------------------------------------------------------------------------------------------------------------------------------------------------------------------------------------------------------------------------------------------------------------------------------------------------------------------------------------------------------------------------------------------------------------------------------------------------------------------------------------------------------------------------------------------------------------------------------------------------------------------------------------------------------------------------------------------------------------------------------------------|
| <p>The decision to compare services across countries –given the variation in how social prescribing is applied in different countries (there is anew paper on this about to come out in BMJ Global Health), I wonder if this had been anarea of consideration by the team? As only two countries were reflected in included papers,this was perhaps not an issue, although it is something to consider when synthesising papers on interventions that arecontext dependent.</p> | <p>Thank you for that relevant reference. We have included it in the Introduction. “Social prescribing is however gaining momentum internationally and while interventions are adapted to the local context,there are similarities and potential to learn from experiences in other countries. (13)” (P7)</p> <p>We agree that context and variation in application of social prescribing, not just in different countries but indifferent boroughs makes it challenging to make direct comparisons, and because of the heterogeneityof the papers identified we did not attempt meta- analysis. We have tried to be as specific as possible around the context of any results and have added country to all tables to help put results in context as per suggestion from Reviewer 3. We also refer to the heterogeneity of interventions in our Discussion</p> <p>“It could be argued that only four of the studies tested interventions that reflect the format of currentsocial prescribing link worker activities in the UK, which are relatively short and tailored to the individual and locality, with a high degree of flexibility(25, 29-31). Even among these, there is variation in terms of the intensity of support and link worker location, with both community and primary care settings”</p> |
| <p>It was good to see the range of terms used to try andidentify papers. Perhaps there could be a reference to the following paper that highlightedthe range of terms used in England (<a href="https://bjgp.org/content/69/687/e675.abstract">https://bjgp.org/content/69/687/e675.abstract</a>).</p>                                                                                                                                                                          | <p>Thank you. Again another useful reference that wehave included in the Methods section.</p> <p>“Inclusion was based on the function of the role, i.e.supporting people to improve their health and wellbeing through connecting them with communityresources and health and social care coordination, recognising that there is a wide range of terms used to describe such roles. (17)” (P8)</p>                                                                                                                                                                                                                                                                                                                                                                                                                                                                                                                                                                                                                                                                                                                                                                                                                                                                                                           |

|                                                                                                                                                                                                                                                                                                                   |                                                                                                                                                                                                                                                                                                                                                                                                                                                                                                                                                                                                                                                                                         |
|-------------------------------------------------------------------------------------------------------------------------------------------------------------------------------------------------------------------------------------------------------------------------------------------------------------------|-----------------------------------------------------------------------------------------------------------------------------------------------------------------------------------------------------------------------------------------------------------------------------------------------------------------------------------------------------------------------------------------------------------------------------------------------------------------------------------------------------------------------------------------------------------------------------------------------------------------------------------------------------------------------------------------|
| <p>The authors had face-to-face interaction as an inclusion criteria. Perhaps there needs to be some reflection on this in light of how link workers have and continue to work because of the pandemic – remote working has been adopted and continues to be used or is mixed with face-to-face interactions.</p> | <p>Yes- the inclusion criteria were developed prior to the pandemic with the intention of distinguishing telephone interventions from link worker interventions, which usually where possible involve at least one face to face interaction. We have clarified in the Methods section that only one meeting needed to be face to face and others could be remote “Participants meeting with a link worker face to face at least once, although additional contacts could be via telephone or other remote methods” (P9).</p> <p>We have also added a line to the Discussion on implications for research acknowledging the change in practice “(45) Since the pandemic link workers</p> |
|-------------------------------------------------------------------------------------------------------------------------------------------------------------------------------------------------------------------------------------------------------------------------------------------------------------------|-----------------------------------------------------------------------------------------------------------------------------------------------------------------------------------------------------------------------------------------------------------------------------------------------------------------------------------------------------------------------------------------------------------------------------------------------------------------------------------------------------------------------------------------------------------------------------------------------------------------------------------------------------------------------------------------|

|                                                                                                                                                                                       |                                                                                                                                                                                                                                                                                                                                                                                                                                                                                                                                                                                                                                                                                                                                                                                                                                                                                     |
|---------------------------------------------------------------------------------------------------------------------------------------------------------------------------------------|-------------------------------------------------------------------------------------------------------------------------------------------------------------------------------------------------------------------------------------------------------------------------------------------------------------------------------------------------------------------------------------------------------------------------------------------------------------------------------------------------------------------------------------------------------------------------------------------------------------------------------------------------------------------------------------------------------------------------------------------------------------------------------------------------------------------------------------------------------------------------------------|
|                                                                                                                                                                                       | <p>have adapted to restrictions and use more remote supports which has impacted participants experience.<br/>(46) The impact of this on outcomes is yet to be evaluated. (P32)</p>                                                                                                                                                                                                                                                                                                                                                                                                                                                                                                                                                                                                                                                                                                  |
| <p>Data management – how were data that were extracted managed? Excel? Excel and Word?</p>                                                                                            | <p>Excel was used to manage extracted data. And this has been added to the Methods on P12 under Data Management “Excel was used to manage extracted data”</p>                                                                                                                                                                                                                                                                                                                                                                                                                                                                                                                                                                                                                                                                                                                       |
| <p>Page 11 – at the start of the section on the review process, what was meant by ‘clearly ineligible titles’? Can some examples of what constituted clearly ineligible be given?</p> | <p>As outlined in response to editors comments, we have added an example and further clarification of this process to the Methods<br/>“The lead author (BK) then did an initial screen to remove clearly ineligible titles. This step was necessary due to the large number of potentially eligible reports returned by our search strategy. Where it was clear from the title that our eligibility criteria on population, intervention or methods were not met the title was excluded. For example, a title clearly reporting a qualitative study of a healthcare intervention delivered by lay people to children, such as a qualitative study of a community health worker intervention for childhood diarrhoea, would have been excluded. Any report where it was not clear from the title if eligibility criteria were met was reviewed by abstract by BK and AC (P12/13)</p> |

|                                                                                                                                                                                                                              |                                                                                                                                                                                                                                                                                                                                                                                                                                                                                                                           |
|------------------------------------------------------------------------------------------------------------------------------------------------------------------------------------------------------------------------------|---------------------------------------------------------------------------------------------------------------------------------------------------------------------------------------------------------------------------------------------------------------------------------------------------------------------------------------------------------------------------------------------------------------------------------------------------------------------------------------------------------------------------|
| <p>I presume that papers also did not give information about how long interactions were between a patient and a link worker (e.g. number of minutes per patient)? Whether the interactions were short or medium or long?</p> | <p>You are correct and we had reported this lack of information. The IMPaCT intervention included duration of time spent with participants- 38.4 hours in total, but there was not any detail on duration of individual contacts in this or other studies. We have added additional comment on this in the Results: Interventions and comparators, for the IMPACT study as follows<br/> “Each link worker worked with 55 clients per year for an average of 38.4 hours suggesting an average of one hour per meeting”</p> |
| <p>Any information on the professional background/prior background of link workers in the studies?</p>                                                                                                                       | <p>Any information available has been included in Table 1 under “Intervention”</p>                                                                                                                                                                                                                                                                                                                                                                                                                                        |
| <p>Any information about how many things patients were connected to in the community?<br/> Any information in papers about the sorts of things papers were referred on to?</p>                                               | <p>There was no information on how many resources or services people were connected to but some additional information on types and uptake of resources has been added to the Results:<br/> Interventions and comparators on page 15<br/> “Resources referred to were tailored to the individual in all interventions with counselling services, social and craft groups, exercises classes, addiction</p>                                                                                                                |
|                                                                                                                                                                                                                              | <p>supports, welfare and employment advice all mentioned as examples of resources. Only one study reported specifically on uptake of community resources with uptake of resources positively associated with number of link worker contacts and ranging from 36% of participants who had met once to 71% of participants who had met 4 times. (29) “</p>                                                                                                                                                                  |
| <p>Were Kangovi et al. 2017 and 2018 different studies or just reporting on different elements of the same study?</p>                                                                                                        | <p>They were different studies. The 2017 paper reported on participants recruited via internal medicine clinics, and the 2018 paper on participants from primary care centres. The intervention was the same. See Table 1.</p>                                                                                                                                                                                                                                                                                            |

|                                                                                                                                                                                                                                                                                                                                                                                                                                                                                                                                                                                                                      |                                                                                                                                                                                                                                                                                                                                                                                                                                                                                                                                                                                   |
|----------------------------------------------------------------------------------------------------------------------------------------------------------------------------------------------------------------------------------------------------------------------------------------------------------------------------------------------------------------------------------------------------------------------------------------------------------------------------------------------------------------------------------------------------------------------------------------------------------------------|-----------------------------------------------------------------------------------------------------------------------------------------------------------------------------------------------------------------------------------------------------------------------------------------------------------------------------------------------------------------------------------------------------------------------------------------------------------------------------------------------------------------------------------------------------------------------------------|
| <p>It was interesting to note a lack of increase in social support in included studies (page 22) – given that social capital development has been proposed as a key component of bringing anticipated benefits in social prescribing (<a href="https://bmcmedicine.biomedcentral.com/articles/10.1186/s12916-020-1510-7">https://bmcmedicine.biomedcentral.com/articles/10.1186/s12916-020-1510-7</a>). This would seem to fit with the finding of a lack of improvement in loneliness. Perhaps if this is not addressed sufficiently then benefits in terms of quality of life and cost savings will not arise?</p> | <p>A comment on this has been added in the Discussion “Improving social connections is one of the key mechanisms by which social prescribing is thought to improve outcomes, (38, 39), but only three studies reported on this. Including this as an outcome in future may help demonstrate interim impact.” (P29)</p> <p>“As mentioned previously social connectedness is another important interim measure to consider.” (P33)</p>                                                                                                                                              |
| <p>There could be some reflection here about the difficulties of a trial type design for this type of intervention. What is likely to be happening is that it works for some people, in certain situations for specific reasons – taking a binary approach (works/doesn’t work) is probably too blunt for a complex intervention like this – which is shaped by contextual factors and relationships.</p>                                                                                                                                                                                                            | <p>We have attempted to address some of the challenges on P32 and added a line to the Discussion: Implications for future research emphasising that the RCT is only part of the picture for complex interventions “RCTs are feasible as shown by the trials in the review. They are of course challenging given the tailored nature of social prescribing link worker interventions, and parallel process evaluations are recommended to evaluate contextual factors and mechanisms of action, (55), which in turn can inform further refining of existing programmes.” (P33)</p> |
| <p>Mention of the PAM on page 29 – I am not sure if this is still recommended for use.</p>                                                                                                                                                                                                                                                                                                                                                                                                                                                                                                                           | <p>It is, but among a range of other measures, so the focus is not so much on PAM so we have removed this reference in the the Discussion: Implications for future research and replaced it with “There are no agreed outcomes or measures for social prescribing. The NHS does not recommend any specific measures in its draft outcomes framework that recommends self management, physical activity and social connectedness as individual outcomes. (3)” (P33)</p>                                                                                                            |
| <p>Perhaps reflect on changes that may come about due to COVID (e.g. more remote working, shorter appointments) – this may mean there is not enough time to legitimise the link worker role as a credible alternative to medical care from the perspective of patients (as suggested in a previous realist review -</p>                                                                                                                                                                                                                                                                                              | <p>A comment on this has been added to the Discussion: Implications for research “Since the pandemic link workers have adapted to restrictions and use more remote supports, which has impacted participants experiences. (46) The impact of this on outcomes is yet to be evaluated.” (P32)</p>                                                                                                                                                                                                                                                                                  |

|                                                                                                                                                                         |  |
|-------------------------------------------------------------------------------------------------------------------------------------------------------------------------|--|
| <p><a href="https://bmcmedicine.biomedcentral.com/articles/10.1186/s12916-020-1510-7">https://bmcmedicine.biomedcentral.com/articles/10.1186/s12916-020-1510-7</a>.</p> |  |
|-------------------------------------------------------------------------------------------------------------------------------------------------------------------------|--|

|                                                                                                                                                                                                                                                                                                                                     |                                                                                                                                                                                                                                                                                                                                                                                                                                                                                                                                                                                                                                                                                                                                                                                                                                                                                                                                                                                                                                                                                                                               |
|-------------------------------------------------------------------------------------------------------------------------------------------------------------------------------------------------------------------------------------------------------------------------------------------------------------------------------------|-------------------------------------------------------------------------------------------------------------------------------------------------------------------------------------------------------------------------------------------------------------------------------------------------------------------------------------------------------------------------------------------------------------------------------------------------------------------------------------------------------------------------------------------------------------------------------------------------------------------------------------------------------------------------------------------------------------------------------------------------------------------------------------------------------------------------------------------------------------------------------------------------------------------------------------------------------------------------------------------------------------------------------------------------------------------------------------------------------------------------------|
| <p>Page 30 – the line about cost savings ('The opportunity costs of investing in social prescribing may be considerable') – perhaps make very clear that there is a lack of evidence to make this claim at present.</p>                                                                                                             | <p>We have replaced this line in the Conclusion with "The opportunity costs of investing in social prescribing link workers are unknown. It is essential that high quality trials determining cost effectiveness are conducted so that the evidence can catch up with the policy and we avoid wasting valuable time and resources. "</p>                                                                                                                                                                                                                                                                                                                                                                                                                                                                                                                                                                                                                                                                                                                                                                                      |
| <p>Reviewer 2</p>                                                                                                                                                                                                                                                                                                                   |                                                                                                                                                                                                                                                                                                                                                                                                                                                                                                                                                                                                                                                                                                                                                                                                                                                                                                                                                                                                                                                                                                                               |
| <p>In the Abstract, please comment on the quality of the evidence reviewed.</p>                                                                                                                                                                                                                                                     | <p>The revised abstract now includes this. "Eight studies (n=6,500 participants), with five randomized controlled trials at low risk of bias and three controlled before after studies at high risk of bias, were included."</p>                                                                                                                                                                                                                                                                                                                                                                                                                                                                                                                                                                                                                                                                                                                                                                                                                                                                                              |
| <p>In the Abstract Results and Discussion, please adjust the wording to make clear the distinction between absence of evidence and evidence of absence</p>                                                                                                                                                                          | <p>Wording has been adjusted to make this clear in the revised Abstract "There is an absence of evidence for social prescribing link workers. "<br/> And in the Conclusion<br/> "The opportunity costs of investing in social prescribing link workers are unknown and it is essential that high quality trials determining cost effectiveness are conducted so that the evidence can catch up with the policy and we avoid wasting valuable time and resources. "</p>                                                                                                                                                                                                                                                                                                                                                                                                                                                                                                                                                                                                                                                        |
| <p>3. The included studies might possibly have been naïve to think that a link worker would have short term impacts on QoL. In the Discussion, it might be worth suggesting a possible logic model for how the link worker might have effect. This could lead to suggestions for more appropriate process and outcome measures.</p> | <p>We have included a comment on the importance of improving social connections as a potential mechanism for improving outcomes in social prescribing in Discussion<br/> "The outcomes chosen, in particular HRQoL may also have been difficult to improve in the short time frame of most studies. Improving social connections is one of the key mechanisms by which social prescribing is thought to improve outcomes, (38, 39), but only three studies reported on this. Including this as an outcome in future may help demonstrate interim impact" (P30)</p> <p>The limitations of HRQoL had been mentioned previously in the Discussion and we have now referred to the potential of social connections as an interim measure.</p> <p>"The EuroQoL HRQoL measure, EQ-5D-5L (50), is one such measure, but it can be difficult to show changes in a relatively short timeframe (51) and is quite health focused whereas social prescribing has potentially wider social benefits. The ICECAP-A (The ICEpop CAPability measure for Adults) is an alternative. (52) It measures capability well-being, can be used in</p> |



|  |                                                 |
|--|-------------------------------------------------|
|  | economic evaluations and is recommended by NICE |
|--|-------------------------------------------------|

|                                                                            |                                                                                                                                                                                                                                                                                                 |
|----------------------------------------------------------------------------|-------------------------------------------------------------------------------------------------------------------------------------------------------------------------------------------------------------------------------------------------------------------------------------------------|
|                                                                            | for use in evaluations of interventions with potential health and social benefits. (53) Future studies should consider its inclusion as an outcome. As mentioned previously social connectedness is another important interim measure to consider” (P33)                                        |
| <p>Reviewer 3</p> <p>The search is a year old – it should be refreshed</p> | <p>It is not within our resources to update the full search, particularly given the volume of citations this search identifies. To address this comment we have updated the forward citation search, resulting in the identification of one more US based RCT, which has now been included.</p> |

|                                                                                                                                                                                                                                                                                                                 |                                                                                                                                                                                                                                                                                                                                                                                                                                                                                                                                                                                                                                                                                                                                                                                                                                                                                                                                                                                                                                                                                                                                                                                                                                                                                                                                                                                                                                                                                                                                                                                                                                                                                                                                                                                                         |
|-----------------------------------------------------------------------------------------------------------------------------------------------------------------------------------------------------------------------------------------------------------------------------------------------------------------|---------------------------------------------------------------------------------------------------------------------------------------------------------------------------------------------------------------------------------------------------------------------------------------------------------------------------------------------------------------------------------------------------------------------------------------------------------------------------------------------------------------------------------------------------------------------------------------------------------------------------------------------------------------------------------------------------------------------------------------------------------------------------------------------------------------------------------------------------------------------------------------------------------------------------------------------------------------------------------------------------------------------------------------------------------------------------------------------------------------------------------------------------------------------------------------------------------------------------------------------------------------------------------------------------------------------------------------------------------------------------------------------------------------------------------------------------------------------------------------------------------------------------------------------------------------------------------------------------------------------------------------------------------------------------------------------------------------------------------------------------------------------------------------------------------|
| <p>The authors should define link workers up front, ideally in both the abstract and introduction. o There are a number of different terms used for these workers (at least given my understanding), e.g. community health workers, patient navigators, case managers, etc. Would suggest making this clear</p> | <p>This is now defined in the Abstract “social prescribing link workers (non-health or social care professionals who connect people to community resources)” and in more detail in the introduction</p> <p>“Social prescribing is a way of linking people with complex needs to non-medical supports in the community. There are different models of social prescribing, ranging from online signposting services to individual support from a link worker to access community resource. The link worker model of social prescribing is most frequently used in the UK.(1) Link workers are non health or social care professionals, usually based in primary care or community organisations, who determine the health and well-being needs of people referred to them (usually by health care professionals), co-produce a health and well-being plan and provide support to connect with community resources to meet these needs.” (P6)</p> <p>The different terminology is referred to in the Methods: Intervention section as follows:</p> <p>“Social prescribing link workers may be known by other terms such as community health workers, patient navigators or health facilitators. While all of these work in the area of health, they are generally considered “lay workers” as they have not completed formal professional health or social care qualifications. Similarly, the process of social prescribing may be known by other terms such as “community referral” or “navigation”. Inclusion was based on the function of the role, i.e. supporting people to improve their health and wellbeing through connecting them with community resources and health and social care coordination, recognising that there is a wide range of terms used to describe such roles. (17)” (P8)</p> |
| <p>I was confused about the relationship btw link workers and social prescribing. The discussion frames around social prescribing, whereas the</p>                                                                                                                                                              | <p>Terminology has now been streamlined to refer to “social prescribing link workers” throughout, to avoid</p>                                                                                                                                                                                                                                                                                                                                                                                                                                                                                                                                                                                                                                                                                                                                                                                                                                                                                                                                                                                                                                                                                                                                                                                                                                                                                                                                                                                                                                                                                                                                                                                                                                                                                          |
| <p>intro talks about link workers. Neither term was clearly defined, much less the intersection btw the two. o I suggest streamlining the terminology around link workers or social prescribing, instead of using the two interchangeably.</p>                                                                  | <p>confusion with the other lighter touch forms of social prescribing mentioned in the introduction.</p>                                                                                                                                                                                                                                                                                                                                                                                                                                                                                                                                                                                                                                                                                                                                                                                                                                                                                                                                                                                                                                                                                                                                                                                                                                                                                                                                                                                                                                                                                                                                                                                                                                                                                                |

|                                                                                                                                                                                                                                                                                                                           |                                                                                                                                                                                                                                                                                                                                                                                                                                                                                                                                                                                                                                                                                                                                                                                                                                                                                        |
|---------------------------------------------------------------------------------------------------------------------------------------------------------------------------------------------------------------------------------------------------------------------------------------------------------------------------|----------------------------------------------------------------------------------------------------------------------------------------------------------------------------------------------------------------------------------------------------------------------------------------------------------------------------------------------------------------------------------------------------------------------------------------------------------------------------------------------------------------------------------------------------------------------------------------------------------------------------------------------------------------------------------------------------------------------------------------------------------------------------------------------------------------------------------------------------------------------------------------|
| <p>The authors search criteria do not seem all inclusive. E.g. I would think that case manager and social worker should be included.</p>                                                                                                                                                                                  | <p>Case managers and social workers would be regarded as health and social care professionals. Link workers are specifically non-health or social care professionals and so these terms were not included in the search criteria.</p>                                                                                                                                                                                                                                                                                                                                                                                                                                                                                                                                                                                                                                                  |
| <p>I would suggest the authors make it clear in the introduction why this is an important topic</p>                                                                                                                                                                                                                       | <p>We have revised the Introduction to reflect this “A recent systematic review however, concluded that there was a lack of evidence for how, for whom and when social prescribing was effective or how much it cost.(10) Previous reviews have only looked at U.K. based interventions and included a broad range of studies including those with uncontrolled designs.(11,12). Social prescribing is however gaining momentum internationally and while interventions are adapted to the local context, there are similarities and potential to learn from experiences in other countries. (13) We aimed to systematically review the evidence of effectiveness and costs of link worker social prescribing link worker interventions internationally and to establish the evidence, if any, for their effectiveness in people with multimorbidity and social deprivation.” (P7)</p> |
| <p>There are a number of places where the use of citations would be helpful. E.g. line 39 in the introduction.</p>                                                                                                                                                                                                        | <p>We have rephrased this line to make it clearer “People experiencing multimorbidity (defined as two or more chronic health conditions) experience fragmented care, poorer health outcomes and more psychological stress and as multimorbidity becomes the norm among an aging population, it poses a significant challenge to health systems.(4)”</p>                                                                                                                                                                                                                                                                                                                                                                                                                                                                                                                                |
| <p>The UK and US environments are extremely different, especially for something like link workers. For instance, baseline access issues are quite important in the US context. As a result, the country is extremely important to contextualizing the results in Table 2 and I would suggest adding this information.</p> | <p>The country location has now been included in all tables.</p>                                                                                                                                                                                                                                                                                                                                                                                                                                                                                                                                                                                                                                                                                                                                                                                                                       |
| <p>Is there a way to report results in Table 1 as well? This would help the reader see and think through the mechanics a bit more. Perhaps you can combine Table 1 with Table 3?</p>                                                                                                                                      | <p>Unfortunately there is a journal limit on length of tables and we also think this volume of information would make the Table very difficult to read.</p>                                                                                                                                                                                                                                                                                                                                                                                                                                                                                                                                                                                                                                                                                                                            |
| <p>Table 3 only reports adjusted mean differences. In order to interpret across studies,</p>                                                                                                                                                                                                                              | <p>Means (SD) are now included in Table 3</p>                                                                                                                                                                                                                                                                                                                                                                                                                                                                                                                                                                                                                                                                                                                                                                                                                                          |
| <p>and to have a sense of relative magnitudes, authors should also report means.</p>                                                                                                                                                                                                                                      |                                                                                                                                                                                                                                                                                                                                                                                                                                                                                                                                                                                                                                                                                                                                                                                                                                                                                        |

|                                                                                                        |                                                                                                                                                                                                                                                                                                                                |
|--------------------------------------------------------------------------------------------------------|--------------------------------------------------------------------------------------------------------------------------------------------------------------------------------------------------------------------------------------------------------------------------------------------------------------------------------|
| I believe Table 3 notes only defines SF12v2, not SF12 PCS. Please make clear what these both are.      | SF12 PCS would have been the original score and V2 an updated version, but we double checked Dickens et al and they used V2, so this has been updated in the table.                                                                                                                                                            |
| I wanted more in the discussion about what we can learn from these studies, as well as what we cannot. | We have now included this in the Discussion "These findings demonstrate that it is possible to conduct RCTs of social prescribing link worker interventions, but for those with complex needs more intense interventions delivered alongside chronic disease management programmes may be required to improve outcomes." (P29) |
| Please make text font consistent throughout                                                            | Font size in Table 1 was smaller to meet journal requirements for Tables fitting onto 2 pages. It is now Calibri 10 in all Tables for consistency and Times New Roman 12 in main text.                                                                                                                                         |

#### VERSION 2 – REVIEW

|                        |                                                                                                |
|------------------------|------------------------------------------------------------------------------------------------|
| <b>REVIEWER</b>        | Stephanie Tierney<br>University of Oxford, Nuffield Department of Primary Care Health Sciences |
| <b>REVIEW RETURNED</b> | 15-Aug-2022                                                                                    |

|                         |                                                                      |
|-------------------------|----------------------------------------------------------------------|
| <b>GENERAL COMMENTS</b> | I am happy with the revisions and responses provided by the authors. |
|-------------------------|----------------------------------------------------------------------|

|                        |                                                                      |
|------------------------|----------------------------------------------------------------------|
| <b>REVIEWER</b>        | Adrienne Sabety<br>University of Notre Dame, Department of Economics |
| <b>REVIEW RETURNED</b> | 18-Aug-2022                                                          |

|                         |                                                                    |
|-------------------------|--------------------------------------------------------------------|
| <b>GENERAL COMMENTS</b> | The reviewer completed the checklist but made no further comments. |
|-------------------------|--------------------------------------------------------------------|
